# Supplementary material for: Chronic wounds in a multiethnic Asian population: a cost of illness study
Source: PubMed Central journal article supplement — BMJ Open. 2023 Sep 18;13(9):e065692. doi: 10.1136/bmjopen-2022-065692 (PMC10510887; doi:10.1136/bmjopen-2022-065692), 2023-09-18
Supplement: bmjopen-2022-065692.draft_revisions.pdf [file bmjopen-2022-065692.draft_revisions.pdf]

# BMJ Open

BMJ Open is committed to open peer review. As part of this commitment we make the peer review history of every article we publish publicly available.

When an article is published we post the peer reviewers' comments and the authors' responses online. We also post the versions of the paper that were used during peer review. These are the versions that the peer review comments apply to.

The versions of the paper that follow are the versions that were submitted during the peer review process. They are not the versions of record or the final published versions. They should not be cited or distributed as the published version of this manuscript.

BMJ Open is an open access journal and the full, final, typeset and author-corrected version of record of the manuscript is available on our site with no access controls, subscription charges or pay-per-view fees (<http://bmjopen.bmj.com>).

If you have any questions on BMJ Open's open peer review process please email [info.bmjopen@bmj.com](mailto:info.bmjopen@bmj.com)

# BMJ Open

## Chronic Wounds in a Multi-Ethnic Asian Population. A Cost of Illness Study.

|                               |                                                                                                                                                                                                                                                                                                                                                                                                                                                                                                                                                                                                                                                                                                                                                                                                                                               |
|-------------------------------|-----------------------------------------------------------------------------------------------------------------------------------------------------------------------------------------------------------------------------------------------------------------------------------------------------------------------------------------------------------------------------------------------------------------------------------------------------------------------------------------------------------------------------------------------------------------------------------------------------------------------------------------------------------------------------------------------------------------------------------------------------------------------------------------------------------------------------------------------|
| Journal:                      | <i>BMJ Open</i>                                                                                                                                                                                                                                                                                                                                                                                                                                                                                                                                                                                                                                                                                                                                                                                                                               |
| Manuscript ID                 | bmjopen-2022-065692                                                                                                                                                                                                                                                                                                                                                                                                                                                                                                                                                                                                                                                                                                                                                                                                                           |
| Article Type:                 | Original research                                                                                                                                                                                                                                                                                                                                                                                                                                                                                                                                                                                                                                                                                                                                                                                                                             |
| Date Submitted by the Author: | 17-Jun-2022                                                                                                                                                                                                                                                                                                                                                                                                                                                                                                                                                                                                                                                                                                                                                                                                                                   |
| Complete List of Authors:     | Graves, Nicholas; Duke-NUS Medical School<br>Ganesan, Ganga; Ministry of Health Singapore<br>Tan, Kelvin; Ministry of Health Singapore, Policy Research & Evaluation Division<br>Goh , Orlanda Qi Mei; Singapore General Hospital, Department of Internal Medicine<br>Ho, Jackie; National University of Singapore<br>Chong, Tze; Singapore General Hospital,<br>Bishnoi, Priya; A*STAR,<br>Carmody, David; Singapore General Hospital, Department of Internal Medicine<br>Yuh, Ang Shin; Singapore General Hospital<br>Ng, Yi Zhen; Skin Research Institute of Singapore,<br>Lo, Zhiwen; National Healthcare Group Woodlands Health Campus<br>Enming, Yong; Tan Tock Seng Hospital<br>Abu Bakar Aloweni, Fazila; Singapore General Hospital, Nursing Division<br>Zifei, Wang; Skin Research Institute of Singapore<br>Harding, Keith; A*STAR |
| Keywords:                     | GENERAL MEDICINE (see Internal Medicine), HEALTH ECONOMICS, HEALTH SERVICES ADMINISTRATION & MANAGEMENT                                                                                                                                                                                                                                                                                                                                                                                                                                                                                                                                                                                                                                                                                                                                       |
|                               |                                                                                                                                                                                                                                                                                                                                                                                                                                                                                                                                                                                                                                                                                                                                                                                                                                               |

SCHOLARONE™  
Manuscripts

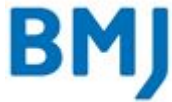

I, the Submitting Author has the right to grant and does grant on behalf of all authors of the Work (as defined in the below author licence), an exclusive licence and/or a non-exclusive licence for contributions from authors who are: i) UK Crown employees; ii) where BMJ has agreed a CC-BY licence shall apply, and/or iii) in accordance with the terms applicable for US Federal Government officers or employees acting as part of their official duties; on a worldwide, perpetual, irrevocable, royalty-free basis to BMJ Publishing Group Ltd ("BMJ") its licensees and where the relevant Journal is co-owned by BMJ to the co-owners of the Journal, to publish the Work in this journal and any other BMJ products and to exploit all rights, as set out in our [licence](#).

The Submitting Author accepts and understands that any supply made under these terms is made by BMJ to the Submitting Author unless you are acting as an employee on behalf of your employer or a postgraduate student of an affiliated institution which is paying any applicable article publishing charge ("APC") for Open Access articles. Where the Submitting Author wishes to make the Work available on an Open Access basis (and intends to pay the relevant APC), the terms of reuse of such Open Access shall be governed by a Creative Commons licence – details of these licences and which [Creative Commons](#) licence will apply to this Work are set out in our licence referred to above.

Other than as permitted in any relevant BMJ Author's Self Archiving Policies, I confirm this Work has not been accepted for publication elsewhere, is not being considered for publication elsewhere and does not duplicate material already published. I confirm all authors consent to publication of this Work and authorise the granting of this licence.

## Chronic Wounds in a Multi-Ethnic Asian Population. A Cost of Illness Study.

Nicholas Graves. Health Services & Systems Research, Duke-NUS Medical School, Singapore.

Ganga Ganesan. Policy and Research Division, Ministry of Health, Singapore.

Kelvin Tan. Policy and Research Division, Ministry of Health, Singapore.

Orlanda Qi Mei Goh. Department of Internal Medicine, Singapore General Hospital, Singapore.

Jackie Ho. Department of Cardiac, Thoracic and Vascular Surgery, National University Health System, Singapore, Singapore.

Chong Tze Tec. Department of Vascular Surgery, Singapore General Hospital.

Priya Bishnoi. Wound Care Innovation for the Tropics Programme, Skin Research Institute of Singapore, A\*STAR, Singapore.

David Carmody. Department of Internal Medicine, Singapore General Hospital, Singapore.

Ang Shin Yuh. Singapore General Hospital, Singapore.

Ng Yi Zhen. Wound Care Innovation for the Tropics Programme, Skin Research Institute of Singapore, A\*STAR, Singapore.

Zhiwen Lo. Vascular Surgery Service, Tan Tock Seng Hospital, Singapore.

Yong Enming. Vascular Surgery Service, Tan Tock Seng Hospital, Singapore.

Fazila Binte Abu Bakar. Aloweni Singapore General Hospital, Singapore.

Wang Zifei. Wound Care Innovation for the Tropics Programme, Skin Research Institute of Singapore, A\*STAR, Singapore.

Keith Harding. Wound Care Innovation for the Tropics Programme, Skin Research Institute of Singapore, A\*STAR, Singapore.

Corresponding. Nicholas Graves Professor of Health Economics | Deputy Director Health Services & Systems Research, Duke-NUS Medical School | 8 College Road, Singapore 169857 | +65 8333 5906 | n.graves@duke-nus.edu.sg | www.duke-nus.edu.sg

Words. 2620

## Abstract

Objective. To estimate the 'cost of illness' arising from chronic wounds in Singapore.

Design. Incidence based cost of illness study using evidence from a range of sources.

Setting: Singapore health services.

Participants. We consider 3.49 million Singapore citizens and permanent residents. There are 16,752 new individuals with a chronic wound in 2017, with 598 venous ulcers, 2,206 arterial insufficiency ulcers, 6,680 diabetic ulcers and 7,268 pressure injuries.

Outcome measures: number of acute care bed days used; costs of acute care bed days; costs of non-acute health care services; costs of outpatients services; reduced health related quality of life as measured by Quality Adjusted Life Years; value of lost Quality Adjusted Life Years.

Results: Total annual cost of illness was \$350 million (range \$78 to 1,479 million). With 168,419 acute bed days used annually (range 144,050 to 196,789) that incurred costs of \$138 million (range 118 to 162 million). Total costs to health services were \$185 million (range \$121 to \$991). Total annual costs of lost health were 2,071 QALYS (range -2,296 to 26,656) valued at \$166 million (range -184 to 2,052 million).

Conclusions. The costs of chronic wounds are large to Singapore, but many of them could be avoided by making positive investments in integrated and comprehensive wound prevention and treatment programmes.

### Strengths and limitations of this study

- Reliable and relevant data sources were used to update the results
- First study to quantify the national cost of chronic wounds in a multi-ethnic Asian population
- Some important costs were excluded as no data were available
- The sample size for the preference based utility weights for QALYS were small
- Some outcomes were not adjusted for co-morbidities and so likely overstate the true costs.

## 1 Introduction

2  
3  
4 Chronic wounds are those that fail to heal in a time sufficient for normal healing. They tend to present as a  
5 co-morbid rather than primary condition among older individuals. Other risk factors are diabetes, poor  
6 nutrition, incontinence and reduced mobility [1]. They have been described as causing a ‘silent epidemic’  
7 that affects a large proportion of the world’s population [2]. Chronic wounds are prevalent among vulnerable  
8 individuals living at home and residents of long-term care facilities. They are commonly associated with  
9 extended hospital stays yet patient safety programmes have reduced nosocomial events [3].  
10  
11  
12  
13  
14

15 The burden of cost is particularly large [4] with 3% of the total NHS budget [5] and 4% of health care  
16 expenditure in Scandinavian countries used to manage the consequences of chronic wounds [6]. Evidence  
17 from the United States suggests the annual healthcare cost of diabetic foot ulcer alone approximates the  
18 costs of treating cancer [7]. Yet, the goal of reducing the prevalence of chronic wounds has failed to attract  
19 sustained investment from those who pay for health services [8]. This contrasts with other major diseases,  
20 where payers are prepared to invest in ‘cancer moonshots’ for example [9], that will hopefully lead to better  
21 outcomes the future. This inequity is irrational as the technology for reducing chronic wounds is available  
22 now, saves more than it costs to implement [10] and will cause large and certain gains in health outcomes.  
23  
24  
25  
26  
27  
28  
29

30 Ulcers of the skin are the most common type of chronic wounds and include venous ulcers, arterial ulcers,  
31 diabetic foot ulcers and pressure ulcers or injuries. There are associated with a wide range of economic costs  
32 [2]. Affected individuals require frequent evidence-based treatments and if the condition becomes  
33 overwhelming an admission to hospital is inevitable. Many patients will be admitted for other reasons, and  
34 the wound may independently prolong hospital stay [11]. Debridement, minor amputations, and major  
35 amputations are very common among higher risk groups [12, 13]. Chronic wounds are prevalent in aged  
36 care facilities and will incur additional costs for staff time and consumables. Home nursing services as well  
37 as charities and volunteer groups that support the frail and elderly in their homes will also have to manage  
38 many patients [14]. Out of pocket expenditures will arise for patients and family members who travel to  
39 access services and purchase consumable items [15]. Productivity losses will arise as the patients are unable  
40 to perform their normal activities, be they paid or unpaid, and family members will have to take time from  
41 economically productive activity. Health-related quality of life - which has monetary value [16] - will be  
42 reduced. All these relevant costs can be structured by a ‘cost of illness’ method [17]. Estimates arise from  
43 information on the incidence and prevalence of the disease.  
44  
45  
46  
47  
48  
49  
50  
51  
52  
53  
54

55 The aim of this study is to estimate the ‘cost of illness’ arising from chronic wounds in Singapore. Our  
56 results could be used to encourage decision makers to invest in known prevention and management  
57 programmes. The findings will also aid researchers who wish to model the cost savings or the cost-  
58 effectiveness of specific interventions.  
59  
60

## Method

### Scope of the analysis

We include all resident Singapore Citizens and Permanent Residents (n=3.49M), excluding resident foreign nationals and long-term employment pass holders (n=526,000) in 2017 [18]. Singapore has a multi-ethnic Asian population comprising of residents who are 76% Chinese, 15% Malay and 7.5% Indian descent [19].

### Incident cases of chronic wounds

We used published incidence rates for 2017 from a population-based study of wounds among those admitted to acute care hospitals from 2000 to 2017 [20]. For this work the authors identified relevant ICD-10 codes for occurrences of venous ulcers, arterial insufficiency ulcers, diabetic ulcers, and pressure ulcers or injuries, see Appendix 1, and applied them to the Singapore Ministry of Health central claims database, which includes records of all admissions to public and private acute care hospitals. The incidence rates by age band are reported alongside the at-risk population enabling the number of incident cases to be estimated, see Appendix 2.

### Reduced health related quality of life

We used EQ-5D-5L data to estimate the impact of chronic wounds on health-related quality of life. This instrument includes preference based valuations of health states expressed as 'health utilities' on a scale between zero, the worst possible health state, and one, the best possible health state [21]. Multiplying the relevant health utility score by the time individuals spend in that health state provides an estimate of the number of quality adjusted life years (QALYs). QALYs are a recognised outcome measure that reveal the health benefits of new innovations and therapies [22]. Many governments are willing to pay money for services that increase the number of QALYs in a population, given a programme achieves a marginal QALY below a designated cost [23].

We used EQ-5D-5L data from 799 individuals with relevant wounds from the Singapore national wound care registry. Responses were recorded at entry into the registry, when the wound was first assessed in the hospital setting and then at 1, 3 and 6 months, see Appendix 3. We used a Singapore EQ-5D-3L value set [24] that was then mapped onto the EQ-5D-5L version using the SAS code in Appendix 1A. The utility outcomes for the wound patients were compared to population norms for the EQ-5D index informed by Singapore preference weights for appropriate age bands [25] to estimate a decrement to health utility from the wound.

The mean duration of wounds in days for the specific wound types was extracted from the Singapore Wound Registry, see Appendix 4. The economic value of one QALY was set at the mean gross domestic product per

1 capita for Singapore, which is USD \$59,798 or approximately SGD \$80,000 [26]. This approach assumes  
2 one year of perfect quality of life does not exceed the per capita gross domestic product [27].  
3  
4

#### 5 Admissions to hospitals 6 7

8 A population cohort of all inpatient admissions to acute hospitals in Singapore between 2012 and 2019 was  
9 obtained from the Singapore Ministry of Health. We identified all inpatient episodes with any occurrences of  
10 Venous ulcers, Arterial insufficiency ulcers, Diabetic ulcers and Pressure injury or any combination of these  
11 wounds as a primary or secondary diagnosis using the ICD-9 codes in Appendix 1. We extracted the length  
12 of hospital stay and relevant co-variate information that could be used to explain variation in the length of  
13 stay, see Appendix 5.  
14  
15  
16  
17  
18  
19

20 A parsimonious multivariable generalised linear model (GLM) with a gamma link function was used to  
21 accommodate the skew typical of lengths of stay data [28]. The outcome of interest was the excess length of  
22 stay associated with chronic wound management in the inpatient setting. Other covariates included were age,  
23 gender, race, and comorbid chronic diseases. The statistical model generated a coefficient for ‘wound type’  
24 expressed as a rate ratio, that showed the amount of increase in length of stay associated with the presence of  
25 wound, given that other factors that predicted length of stay had been accounted for. This rate ratio was used  
26 to moderate the mean length of stay for the entire sample and an excess length of stay associated with the  
27 wound was estimated, see Appendix 6. The cost per bed-day in 2017 was estimated to be \$823 (95% CI  
28 \$817 to 829) based on information from Singapore’s Ministry of Health.  
29  
30  
31  
32  
33  
34  
35

#### 36 Other Health Services 37 38

39 The same population cohort for 2012 to 2019 who were admitted as inpatients was used to identify their use  
40 of ‘other’ health services in Singapore. Information was available for attendances at the Emergency  
41 Departments of acute hospitals, visits to community-based Polyclinics and use of community health assist  
42 scheme (CHAS). CHAS is a mechanism for funding all Singapore Citizens to attend medical and/or dental  
43 care at participating General Practitioner (GP) and dental clinics. CHAS is particularly designed to support  
44 the management of chronic diseases.  
45  
46  
47  
48  
49  
50

51 We sought to estimate the excess use of these services associated with any chronic wound. For the analysis  
52 each patient is counted only once, and those with wounds are only counted when they first appear with any  
53 wound, and the number of 12-month visits from the incidence date is the outcome variable. For those  
54 without wounds, their 12-month use starts from the first visit during the study period. A parsimonious  
55 generalised linear model with a log link Poisson function was used for all regressions. The outcome of  
56 interest was a count of the use of the services. Other covariates included were age, gender, race Charlson  
57 comorbidity index and presence of comorbid conditions, see Appendix 7. The ensuing statistical models  
58  
59  
60



generated a coefficient for 'any wound' expressed as a rate ratio, that showed the change in the number of visits associated with the presence of wound, given that other factors that predicted variation in these outcomes. As before, the rate ratio was used to moderate the mean counts for the entire sample and an excess number of visits was estimated for all wounds, see Appendix 8. For the costs of health services, we use estimates before any subsidies were paid, from the Singapore Ministry of Health, see Table 1.

## Use of outpatient services

The Singapore national wound care registry was interrogated to identify the annual number of visits for those with chronic wounds and the costs incurred per visits, this information was available by wound type. There were 573 individuals for whom these data were reported. Visits were for specialist consultations specifically for their wound, and for podiatry visit or medical tests. See Appendix 6a.

## Parameters, Uncertainty & Model Evaluation

The parameters used for the cost of illness model estimations are shown in Table 1.

**Table 1. All parameters used for modelling cost of illness of chronic wounds**

| Parameter                           | Estimate | Distribution used for uncertainty | Source |
|-------------------------------------|----------|-----------------------------------|--------|
| Number admissions to hospital       |          |                                   |        |
| Arterial                            | 14,536   | fixed                             | [20]   |
| Venous                              | 19,210   | fixed                             |        |
| Diabetic                            | 16,999   | fixed                             |        |
| Pressure injury                     | 49,879   | fixed                             |        |
| Utility outcomes (baseline)         |          |                                   |        |
| Arterial                            | 0.44     | Beta (0.24:0.30)                  | +      |
| Venous                              | 0.57     | Beta (0.60:0.46)                  |        |
| Diabetic                            | 0.64     | Beta (0.21:0.12)                  |        |
| Pressure                            | -0.18    | Normal (-0.18:0.50)               |        |
| Utility outcomes (month 1)          |          |                                   |        |
| Arterial                            | 0.52     | Beta (0.23:0.21)                  |        |
| Venous                              | 0.68     | Beta (0.89:0.41)                  |        |
| Diabetic                            | 0.71     | Beta (0.04:0.02)                  |        |
| Pressure                            | 0.00     | Normal (0.00:0.56)                |        |
| Utility outcomes (month 3)          |          |                                   |        |
| Arterial                            | 0.54     | Beta (0.13:0.11)                  |        |
| Venous                              | 0.74     | Beta (0.81:0.28)                  |        |
| Diabetic                            | 0.72     | Beta (0.28:0.11)                  |        |
| Pressure                            | 0.18     | Normal (0.18:0.54)                |        |
| Utility outcomes (month 6)          |          |                                   |        |
| Arterial                            | 0.58     | Beta (0.16:0.12)                  |        |
| Venous                              | 0.74     | Beta (0.83:0.28)                  |        |
| Diabetic                            | 0.74     | Beta (0.05:0.02)                  |        |
| Pressure                            | 0.11     | Normal (0.11:0.59)                |        |
| Durations of Arterial wounds (days) |          |                                   | +      |
| <40                                 | 133      | Normal(133,92)                    |        |
| 40-49                               | 129      | Normal(129,109)                   |        |
| 50-59                               | 331      | Normal(331,394)                   |        |
| 60-69                               | 223      | Normal(223,269)                   |        |
| 70-79                               | 307      | Normal(307,438)                   |        |
| ≥80                                 | 205      | Normal(205,153)                   |        |
| Durations of Venous wounds (days)   |          |                                   |        |
| <40                                 | 133      | Normal(133,92)                    |        |

|    |                                                     |          |                     |            |
|----|-----------------------------------------------------|----------|---------------------|------------|
| 1  | 40-49                                               | 129      | Normal(129,109)     | +          |
| 2  | 50-59                                               | 331      | Normal(331,394)     |            |
| 3  | 60-69                                               | 223      | Normal(223,269)     |            |
| 4  | 70-79                                               | 307      | Normal(307,438)     |            |
| 5  | ≥80                                                 | 205      | Normal(205,153)     |            |
| 6  | Durations of Diabetic wounds (days)                 |          |                     |            |
| 7  | <40                                                 | 177      | Normal(177,88)      | +          |
| 8  | 40-49                                               | 325      | Normal(325,550)     |            |
| 9  | 50-59                                               | 224      | Normal(224,216)     |            |
| 10 | 60-69                                               | 314      | Normal(314,430)     |            |
| 11 | 70-79                                               | 256      | Normal(256,305)     |            |
| 12 | ≥80                                                 | 160      | Normal(160,138)     |            |
| 13 | Durations of Pressure injury (days)                 |          |                     |            |
| 14 | <40                                                 | 55       | Normal(55,11)       | +          |
| 15 | 40-49                                               | 86       | Normal(86,24)       |            |
| 16 | 50-59                                               | 115      | Normal(115,1)       |            |
| 17 | 60-69                                               | 103      | Normal(103,59)      |            |
| 18 | 70-79                                               | 105      | Normal(105,115)     |            |
| 19 | ≥80                                                 | 62       | Normal(62,52)       |            |
| 20 | Excess length of acute hospital stay admission      |          |                     |            |
| 21 | Arterial                                            | 2.365    | Gamma(757,0.003)    | Appendix 6 |
| 22 | Venous                                              | 0.788    | Gamma(84,0.009)     |            |
| 23 | Diabetic                                            | 2.259    | Gamma(742,0.003)    |            |
| 24 | Pressure injury                                     | 1.613    | Gamma(724,0.002)    |            |
| 25 | Excess use of Poly clinic visit                     | 0.91     | Gamma(24161,0.05)   |            |
| 26 | Excess use of CHAS services                         | 3.54     | Gamma(157196,0.092) |            |
| 27 | Excess use of ED visit                              | 0.63     | Gamma(35860,0.15)   |            |
| 28 | Outpatient visits number (with consult)             |          |                     | #          |
| 29 | Arterial                                            | 8.2      | Gamma (1.82:4.52)   |            |
| 30 | Venous                                              | 5.9      | Gamma (0.98:5.99)   |            |
| 31 | Diabetic                                            | 8.1      | Gamma (1.70:4.76)   |            |
| 32 | Pressure                                            | 6.5      | Gamma (1.93:3.37)   |            |
| 33 | Outpatient visits number (without consult)          |          |                     |            |
| 34 | Arterial                                            | 8.5      | Gamma (1.77:4.79)   |            |
| 35 | Venous                                              | 23.6     | Gamma (1.55:15.25)  |            |
| 36 | Diabetic                                            | 14.2     | Gamma (0.08:185.15) |            |
| 37 | Pressure                                            | 9.7      | Gamma (0.81:12.00)  |            |
| 38 | Outpatient visits costs per visit (with consult)    |          |                     |            |
| 39 | Arterial                                            | 110.4    | Gamma (5.60:19.74)  |            |
| 40 | Venous                                              | 133.2    | Gamma (2.70:49.30)  |            |
| 41 | Diabetic                                            | 112.0    | Gamma (2.86:39.20)  |            |
| 42 | Pressure                                            | 111.0    | Gamma (4.05:27.43)  |            |
| 43 | Outpatient visits costs per visit (without consult) |          |                     |            |
| 44 | Arterial                                            | 117.3    | Gamma (5.60:19.74)  |            |
| 45 | Venous                                              | 106.8    | Gamma (2.70:49.30)  |            |
| 46 | Diabetic                                            | 114.9    | Gamma (2.86:39.20)  |            |
| 47 | Pressure                                            | 124.1    | Gamma (4.05:27.43)  |            |
| 48 | Economic value per QALY                             | \$80,000 | Fixed               | [26]       |
| 49 | Cost per bed day                                    | \$823    | Normal(823,0.78)    | #          |
| 50 | Cost per Poly clinic visit                          | \$147    | Normal(147,2.5)     |            |
| 51 | Cost per CHAS use                                   | \$56     | Normal(56,1.14)     |            |
| 52 | Cost per ED visit                                   | \$352    | Normal(352,.14)     |            |

+ Skin Research Institute of Singapore, *Singapore Wound Registry, Agency for Science Technology and Research*. Accessed in 2021

# Ministry of Health, *Administrative database*, Ministry of Health (MOH). Accessed in 2021.

Uncertainty for the outcomes was assessed by taking 5,000 random resamples from all prior distributions. Model evaluation was completed by combining the stated parameters to estimate: the number and costs of the excess bed days used for all wound types; the observed annual number of outpatients' consultations; the number and costs of excess visits to polyclinics, CHAS services and ED; the number and value of QALYS foregone.

## Patient and Public Involvement

The data came from the Singapore Wound Registry and from the Ministry of Health. It was routinely reported data collected for the purpose of managing and planning health services. It was not possible to develop the research question or outcome measures based on the priorities, experience, and preferences of the patients. Patients were not involved patients in the design, recruitment and conduct of the study. Patients who are interested will be able to read the paper.

## Results

There are 16,752 new cases for 2017, with 598 venous ulcers, 2,206 arterial insufficiency ulcers, 6,680 diabetic ulcers and 7,268 pressure injuries. The mean and minimum and maximum values obtained from the model parameters for these incident cases are shown in Table 2.

**Table 2. Annual cost outcomes for incident cases (n=16,752), Singapore dollars**

|                             | mean (min:max)                                |
|-----------------------------|-----------------------------------------------|
| Bed days arterial           | 34,397 (30385:38,632)                         |
| Bed days venous             | 15,150 (9,632:22,590)                         |
| Bed days diabetic           | 38,403 (33,829:42,930)                        |
| Bed days pressure           | 80,470 (70,203:92,637)                        |
| Costs bed days arterial     | \$28,308,066 (\$24,932,371:\$31,821,962)      |
| Costs bed days venous       | \$12,468,507 (\$7,941,748:\$18,655,204)       |
| Costs bed days diabetic     | \$31,605,197 (\$27,722,430:\$35,350,126)      |
| Costs bed days pressure     | \$66,225,760 (\$57,852,994:\$76,198,768)      |
| Costs Polyclinic visits     | \$2,249,594 (\$711,389:\$5,127,710)           |
| Costs CHAS episodes of care | \$3,301,201 (\$1,653,310:\$5,815,975)         |
| Costs Outpatients arterial  | \$4,150,483 (\$25,476:\$40,260,866)           |
| Costs Outpatients venous    | \$1,997,965 (\$9,318:\$22,903,331)            |
| Costs Outpatients diabetic  | \$16,333,239 (\$11,130:\$563,220,045)         |
| Costs Outpatients pressure  | \$14,297,952 (\$124,731:\$177,747,006)        |
| Costs ED visits             | \$3,721,208 (\$301,938:\$13,612,955)          |
| QALYS arterial              | 537 (-361:5,802)                              |
| QALYS venous                | 77 (-135:1,119)                               |
| QALYS diabetic              | 854 (-1239:13,177)                            |
| QALYS pressure              | 602 (-560:5,557)                              |
| Value QALYS arterial        | \$42,994,791 (-\$28,897,531:\$464,173,798)    |
| Value QALYS venous          | \$6,187,275 (-\$10,822,288:\$89,547,619)      |
| Value QALYS diabetic        | \$68,316,063 (-\$99,119,920:\$1,054,186,965)  |
| Value QALYS pressure        | \$48,199,106 (-\$44,839,589:\$444,575,871)    |
| Total Costs - Arterial      | \$76,674,669 (\$4,460,814:\$497,501,523)      |
| Total Costs - Venous        | \$20,984,759 (\$1,890,303:\$105,689,456)      |
| Total Costs - Diabetic      | \$119,951,394 (-\$60,215,105:\$1,089,348,943) |
| Total Costs - Pressure      | \$132,745,584 (\$27,551,116:\$531,071,502)    |
| Total Cost of Illness       | \$350,356,406 (\$77,685,675:\$1,478,865,185)  |

Based on our estimates pressure injuries account for 48% of the 168,415 bed days lost to chronic wounds and 39% of the outpatients costs. For the non-hospital sector, the costs of CHAS services and ED visits account for most of the burden. The QALY burdens are large for diabetic foot, arterial and pressure injury with venous having smaller impact. Box plots for all the outcomes except for 'Total Costs' are shown in Appendix 9. Box plots for the 'Total Costs' outcomes are shown in Figure 1.

1 FIGURE 1 HERE  
2  
3

4 There is a large probability that the costs of chronic wounds are positive with the most likely value  
5 suggesting an annual cost of Singapore \$350 million. The findings are uncertainty with the range of total  
6 costs between \$78 million and \$1.48 billion. More than half of the total costs arise from use of health  
7 services (\$185 million, 53%) with outpatients accounting for \$37 million (10%) and the use of acute bed  
8 days accounting for \$139 million (40%). The value of the lost health by QALYs is substantial at \$165  
9 million, 47% of the total burden.  
10  
11  
12  
13

## 14 **Discussion**

15  
16  
17  
18 Our findings reveal the costs of chronic wounds to Singapore are extensive. The total cost burden accounts  
19 for 3.14% of the 2019 Government Health Expenditure on services [29] and 2.3% of total economy-wide  
20 expenditure on services. Our estimates align findings from other countries. In Australia 2% of the total  
21 national health expenditure is allocated to chronic wounds, 3% of the total national health expenditure in the  
22 UK [5] is used, 2% of the European health budget [30]; and, for Scandinavian countries, the costs were 2 to  
23 4% of the total health care expenditure [6]. While the findings are lower than the expected annual costs of  
24 diabetes, estimated to be US \$787 million in 2010 [31], the policy response to diabetes has been  
25 considerable with a 'War on Diabetes' declared in 2016, to mobilise a national programme to reduce the  
26 problem of diabetes [32].  
27  
28  
29  
30  
31  
32  
33

34  
35 This study likely underestimates the extent of the costs of chronic wounds as relevant information was not  
36 available for many costs we suspect are present. Our data came primarily from patients who were admitted  
37 to the hospital for their wounds. Thus patients with less serious wounds managed in the community are  
38 excluded. We were also unable to identify and include estimates of the private costs incurred by patients and  
39 family members. Other studies have found that such costs can be substantial. For the German setting  
40 Purwins et al. [33] found patients with leg ulcers in a given year spent €424 on topical treatments and drugs,  
41 €486 on out of pocket incidentals, €254 on drug prescriptions and €740 on non-drug treatments. Although  
42 no data were available on the time away from work and other production losses, we addressed this by  
43 estimating and valuing lost quality adjusted life years (QALYs). We assume that time in reduced health  
44 states has a relationship with an ability to be economically productive. Thus, the dollar valuations of the lost  
45 QALYs can be thought of as representing lost production from chronic wounds. Importantly we did not  
46 consider the costs of lost production for informal carers, which we expect to be substantial.  
47  
48  
49  
50  
51  
52  
53  
54  
55

56  
57 This recurring and unnecessary cost burden is a deadweight loss to Singapore health services, and society in  
58 general. It could be reduced if evidence-based and relatively simple prevention and management  
59 programmes were implemented. The international evidence [10] reveals that using optimal prevention  
60 practices for diabetic foot ulcers [34] was likely to be cost-saving in Peru [35], Australia [36], Thailand [37]

1 and China [38]. For the prevention of pressure injury nursing led interventions, a quality improvement  
2 collaborative and the standardised use of pressure injury bundles were found to be cost-saving in Denmark  
3 [39], the US and UK [40-43]. And for the prevention of venous leg ulcers, compression therapy, clinical  
4 assessments and use of guidelines were found to be cost-saving in the UK [44, 45] and US [46, 47].  
5  
6  
7

8  
9 There are several limitations to our study. Regarding the estimation of QALY losses, the sample sizes for  
10 EQ5D were quite small for Pressure injury with only 51 patients providing data. It is possible the estimate  
11 would change with a larger and more representative sample. It should be noted that the lowest health utilities  
12 arise from this sample; for example, the values for baseline were -0.18 indicating a health state valued worse  
13 than death, and a value of 0.00, the worst possible health state, was observed for month 1. Values remained  
14 low at 0.18 and 0.11 for the 3 month and 6 month follow-ups. We assumed that the observed decrement  
15 between the population norms for health utility and the estimates from the wound registry were wholly  
16 attributable to the presence of a wound. These QALY estimates did not adjust for the other health conditions  
17 that patients may have, and as such may overstate the QALY losses.  
18  
19  
20  
21  
22  
23  
24

25  
26 Despite these limitations, our findings serve an important purpose of providing baseline information for  
27 researchers who wish to model the cost-effectiveness of programmes that will improve wound outcomes in  
28 the future. Understanding the baseline of costs and QALY outcomes form a useful start-point for evaluation  
29 of intervention studies. These can reveal the potential cost effectiveness of increasing investment in good  
30 quality wound prevention programmes, and can also help bolster arguments for greater investments in these  
31 interventions.  
32  
33  
34  
35  
36

### 37 **Conclusions.**

38  
39  
40 The costs of chronic wounds are large to Singapore, but many of them could be avoided by making positive  
41 investments in integrated and comprehensive wound prevention and treatment programmes.  
42  
43

44  
45 **Authors contributions.** Substantial contributions to the conception or design of the work; or the acquisition,  
46 analysis, or interpretation of data for the work. Drafting the work or revising it critically for important  
47 intellectual content. Final approval of the version to be published. Agreement to be accountable for all  
48 aspects of the work in ensuring that questions related to the accuracy or integrity of any part of the work are  
49 appropriately investigated and resolved. NG; GG; KB; OG; HP; TC; PB; DC; SA; JL; EY; FB; WZ; KH.  
50  
51  
52  
53

54 **A competing interests statement.** None  
55

56  
57 **Funding.** We would like to acknowledge the funding supported from the Agency for Science, Technology  
58 and Research (A\*STAR) under its Industry Alignment Fund-Pre-Positioning Programme (IAF-PP) grant  
59 number H1901a00Y9/ and H17/01/a0/0CC9 as part of the Wound Care Innovation for the Tropics (WCIT)  
60 Programme.

**Data availability statement.** No data from the wound registry or MoH administrative databases are available. This is due to the privacy considerations of the Singapore MOH and the Singapore wound registry.

## Ethics Approval

This research study has been approved by the NHG Domain Specific Review Board (DSRB 2019/00917).

## References

1. Raeder, K., et al., *Prevalence and risk factors of chronic wounds in nursing homes in Germany: A Cross-Sectional Study*. *Int Wound J*, 2020. **17**(5): p. 1128-1134.
2. Graves, N., C.J. Phillips, and K. Harding, *A narrative review of the epidemiology and economics of chronic wounds*. *British Journal of Dermatology*. n/a(n/a).
3. Dávila Torres, J., [To err is human, but to not put processes in place to avoid errors from becoming fatal is inhumane. 5th International Summit of the Patient Safety Movement (PSM), California, USA, 2017]. *Cir Cir*, 2017. **85**(2): p. 101-103.
4. Järbrink, K., et al., *The humanistic and economic burden of chronic wounds: a protocol for a systematic review*. *Syst Rev*, 2017. **6**(1): p. 15.
5. Posnett, J. and P.J. Franks, *The costs of skin breakdown and ulceration in the UK*, in *Skin Breakdown: The Silent Epidemic*, M. Pownett, Editor. 2007, Hull: Smith & Nephew Foundation.
6. Gottrup, F., et al., *A new concept of a multidisciplinary wound healing center and a national expert function of wound healing*. *Archives Of Surgery (Chicago, Ill.: 1960)*, 2001. **136**(7): p. 765-772.
7. Armstrong, D.G., et al., *Five year mortality and direct costs of care for people with diabetic foot complications are comparable to cancer*. *J Foot Ankle Res*, 2020. **13**(1): p. 16.
8. Pacella, R.E., et al., *Reimbursement for the cost of compression therapy for the management of venous leg ulcers in Australia*. *Int Wound J*, 2019. **16**(4): p. 1069-1072.
9. Gyawali, B., R. Sullivan, and C.M. Booth, *Cancer groundshot: going global before going to the moon*. *Lancet Oncol*, 2018. **19**(3): p. 288-290.
10. Cheng, Q., N. Graves, and R.E. Pacella, *Economic Evaluations of Guideline-Based Care for Chronic Wounds: a Systematic Review*. *Appl Health Econ Health Policy*, 2018. **16**(5): p. 633-651.
11. Lo, Z.J., et al., *Clinical and economic burden of wound care in the tropics: a 5-year institutional population health review*. *Int Wound J*, 2020. **17**(3): p. 790-803.
12. Fitridge, R., G. Pena, and J.L. Mills, *The patient presenting with chronic limb-threatening ischaemia. Does diabetes influence presentation, limb outcomes and survival?* *Diabetes Metab Res Rev*, 2020. **36** Suppl 1: p. e3242.
13. Sorber, R. and C.J. Abularrage, *Diabetic foot ulcers: Epidemiology and the role of multidisciplinary care teams*. *Semin Vasc Surg*, 2021. **34**(1): p. 47-53.
14. Martinengo, L., et al., *Prevalence of chronic wounds in the general population: systematic review and meta-analysis of observational studies*. *Ann Epidemiol*, 2019. **29**: p. 8-15.
15. Kapp, S. and N. Santamaria, *The financial and quality-of-life cost to patients living with a chronic wound in the community*. *Int Wound J*, 2017. **14**(6): p. 1108-1119.
16. McCabe, C., K. Claxton, and A.J. Culyer, *The NICE cost-effectiveness threshold: what it is and what that means*. *Pharmacoeconomics*, 2008. **26**(9): p. 733-44.
17. Jo, C., *Cost-of-illness studies: concepts, scopes, and methods*. *Clin Mol Hepatol*, 2014. **20**(4): p. 327-37.
18. Ministry of Health *Population in Brief*. Available at <https://www.population.gov.sg/images/PublicationImages/population-in-brief-2017.pdf>. 2022.
19. Department of Statistics, M.o.T.I., Republic of Singapore,, *Census of Population 2020 Statistical Release 1: Demographic Characteristics, Education, Language and Religion*. Available here <https://www.singstat.gov.sg/-/media/files/publications/cop2020/sr1/cop2020sr1.ashx>. 2020.
20. Goh, O.Q., et al., *Incidence of chronic wounds in Singapore, a multiethnic Asian country, between 2000 and 2017: a retrospective cohort study using a nationwide claims database*. *BMJ Open*, 2020. **10**(9): p. e039411.
21. Devlin N, P.D., Janssen B,, *Methods for Analysing and Reporting EQ-5D Data*. Available here <https://link.springer.com/content/pdf/10.1007%2F978-3-030-47622-9.pdf>. 2020: Springer.

- 1 22. Weinstein, M.C., G. Torrance, and A. McGuire, *QALYs: the basics*. Value Health, 2009. **12 Suppl 1**: p. S5-9.
- 2 23. Rawlins, M.D. and A.J. Culyer, *National Institute for Clinical Excellence and its value judgments*. Bmj, 2004. **329**(7459): p. 224-7.
- 3
- 4 24. Luo, N., et al., *Valuation of EQ-5D-3L health states in Singapore: modeling of time trade-off values for 80 empirically observed health states*. Pharmacoeconomics, 2014. **32**(5): p. 495-507.
- 5
- 6 25. Abdin, E., et al., *Population norms for the EQ-5D index scores using Singapore preference weights*. Qual Life Res, 2015. **24**(6): p. 1545-53.
- 7
- 8 26. World Bank *GDP per capita (current US\$) - Singapore*, available at <https://data.worldbank.org/indicator/NY.GDP.PCAP.CD?locations=SG>. Accessed June 2021. 2018.
- 9
- 10 27. Williams A, *What Could be Nicer than NICE? OHE Annual Lecture*. Available here [file:///C:/Users/gmsgnic/Downloads/292%20-%202004\\_What\\_Could\\_Be\\_Nicer\\_Williams.pdf](file:///C:/Users/gmsgnic/Downloads/292%20-%202004_What_Could_Be_Nicer_Williams.pdf), ed. O.o.H. Economics. 2004, London.
- 11
- 12 28. Dodd, S., et al., *A comparison of multivariable regression models to analyse cost data*. J Eval Clin Pract, 2006. **12**(1): p. 76-86.
- 13
- 14 29. Ministry of Health Singapore, *GOVERNMENT HEALTH EXPENDITURE AND HEALTHCARE FINANCING*. Available here <https://www.moh.gov.sg/resources-statistics/singapore-health-facts/government-health-expenditure-and-healthcare-financing>. 2022.
- 15
- 16 30. Böttrich, J.G. *Challenges in chronic wound care: the need for interdisciplinary collaboration* [cited 2013 Mach 2]; Available from: <http://www.eucomed.be/blog/108/59/blog/2012/02/23/Challenges-in-chronic-wound-care-the-need-for-interdisciplinary-collaboration>.
- 17
- 18 31. Png, M.E., et al., *Current and future economic burden of diabetes among working-age adults in Asia: conservative estimates for Singapore from 2010-2050*. BMC Public Health, 2016. **16**: p. 153.
- 19
- 20 32. Ministry of Health, *WAR ON DIABETES*. Available here <https://www.moh.gov.sg/wodcj>. 2022.
- 21
- 22 33. Purwins, S., et al., *Cost-of-illness of chronic leg ulcers in Germany*. Int Wound J, 2010. **7**(2): p. 97-102.
- 23
- 24 34. Foot., I.W.G.o.t.D., *International consensus on the diabetic foot*. Amsterdam: International Working Group on the Diabetic Foot. 1999.
- 25
- 26 35. Cárdenas, M.K., et al., *The cost of illness attributable to diabetic foot and cost-effectiveness of secondary prevention in Peru*. BMC Health Services Research, 2015. **15**(1): p. 483.
- 27
- 28 36. Cheng, Q., et al., *A cost-effectiveness analysis of optimal care for diabetic foot ulcers in Australia*. Int Wound J, 2017. **14**(4): p. 616-628.
- 29
- 30 37. Rerkasem, K., et al., *A multidisciplinary diabetic foot protocol at Chiang Mai University Hospital: cost and quality of life*. Int J Low Extrem Wounds, 2009. **8**(3): p. 153-6.
- 31
- 32 38. Wu, B., X. Wan, and J. Ma, *Cost-effectiveness of prevention and management of diabetic foot ulcer and amputation in a health resource-limited setting*. J Diabetes, 2018. **10**(4): p. 320-327.
- 33
- 34 39. Mathiesen, A.S.M., et al., *Are labour-intensive efforts to prevent pressure ulcers cost-effective?* Journal of Medical Economics, 2013. **16**(10): p. 1238-1245.
- 35
- 36 40. Padula, W.V., et al., *Improving the quality of pressure ulcer care with prevention: a cost-effectiveness analysis*. Med Care, 2011. **49**(4): p. 385-92.
- 37
- 38 41. Thomson, J.S. and R.G. Brooks, *The economics of preventing and treating pressure ulcers: a pilot study*. J Wound Care, 1999. **8**(6): p. 312-6.
- 39
- 40 42. Xakellis, G.C. and R.A. Frantz, *The Cost-Effectiveness of Interventions for Preventing Pressure Ulcers*. The Journal of the American Board of Family Practice, 1996. **9**(2): p. 79-85.
- 41
- 42 43. Xakellis, G.C., Jr., et al., *Cost-effectiveness of an intensive pressure ulcer prevention protocol in long-term care*. Adv Wound Care, 1998. **11**(1): p. 22-9.
- 43
- 44 44. Bosanquet, N., et al., *Community leg ulcer clinics: cost-effectiveness*. Health Trends, 1993. **25**(4): p. 146-8.
- 45
- 46 45. Simon, D.A., et al., *Community leg ulcer clinics: a comparative study in two health authorities*. Bmj, 1996. **312**(7047): p. 1648-51.
- 47
- 48 46. Korn, P., et al., *Why insurers should reimburse for compression stockings in patients with chronic venous stasis*. J Vasc Surg, 2002. **35**(5): p. 950-7.
- 49
- 50 47. McGuckin, M., et al., *Validation of venous leg ulcer guidelines in the United States and United Kingdom*. Am J Surg, 2002. **183**(2): p. 132-7.
- 51
- 52
- 53
- 54
- 55
- 56
- 57
- 58
- 59
- 60

1 **Figure 1. Total cost outcomes for the cost of Illness by wound type**  
2  
3  
4  
5  
6  
7  
8  
9  
10  
11  
12  
13  
14  
15  
16  
17  
18  
19  
20  
21  
22  
23  
24  
25  
26  
27  
28  
29  
30  
31  
32  
33  
34  
35  
36  
37  
38  
39  
40  
41  
42  
43  
44  
45  
46  
47  
48  
49  
50  
51  
52  
53  
54  
55  
56  
57  
58  
59  
60

For peer review only



1  
2  
3  
4  
5  
6  
7  
8  
9  
10  
11  
12  
13  
14  
15  
16  
17  
18  
19  
20  
21  
22  
23  
24  
25  
26  
27  
28  
29  
30  
31  
32  
33  
34  
35  
36  
37  
38  
39  
40  
41  
42  
43  
44  
45  
46  
47

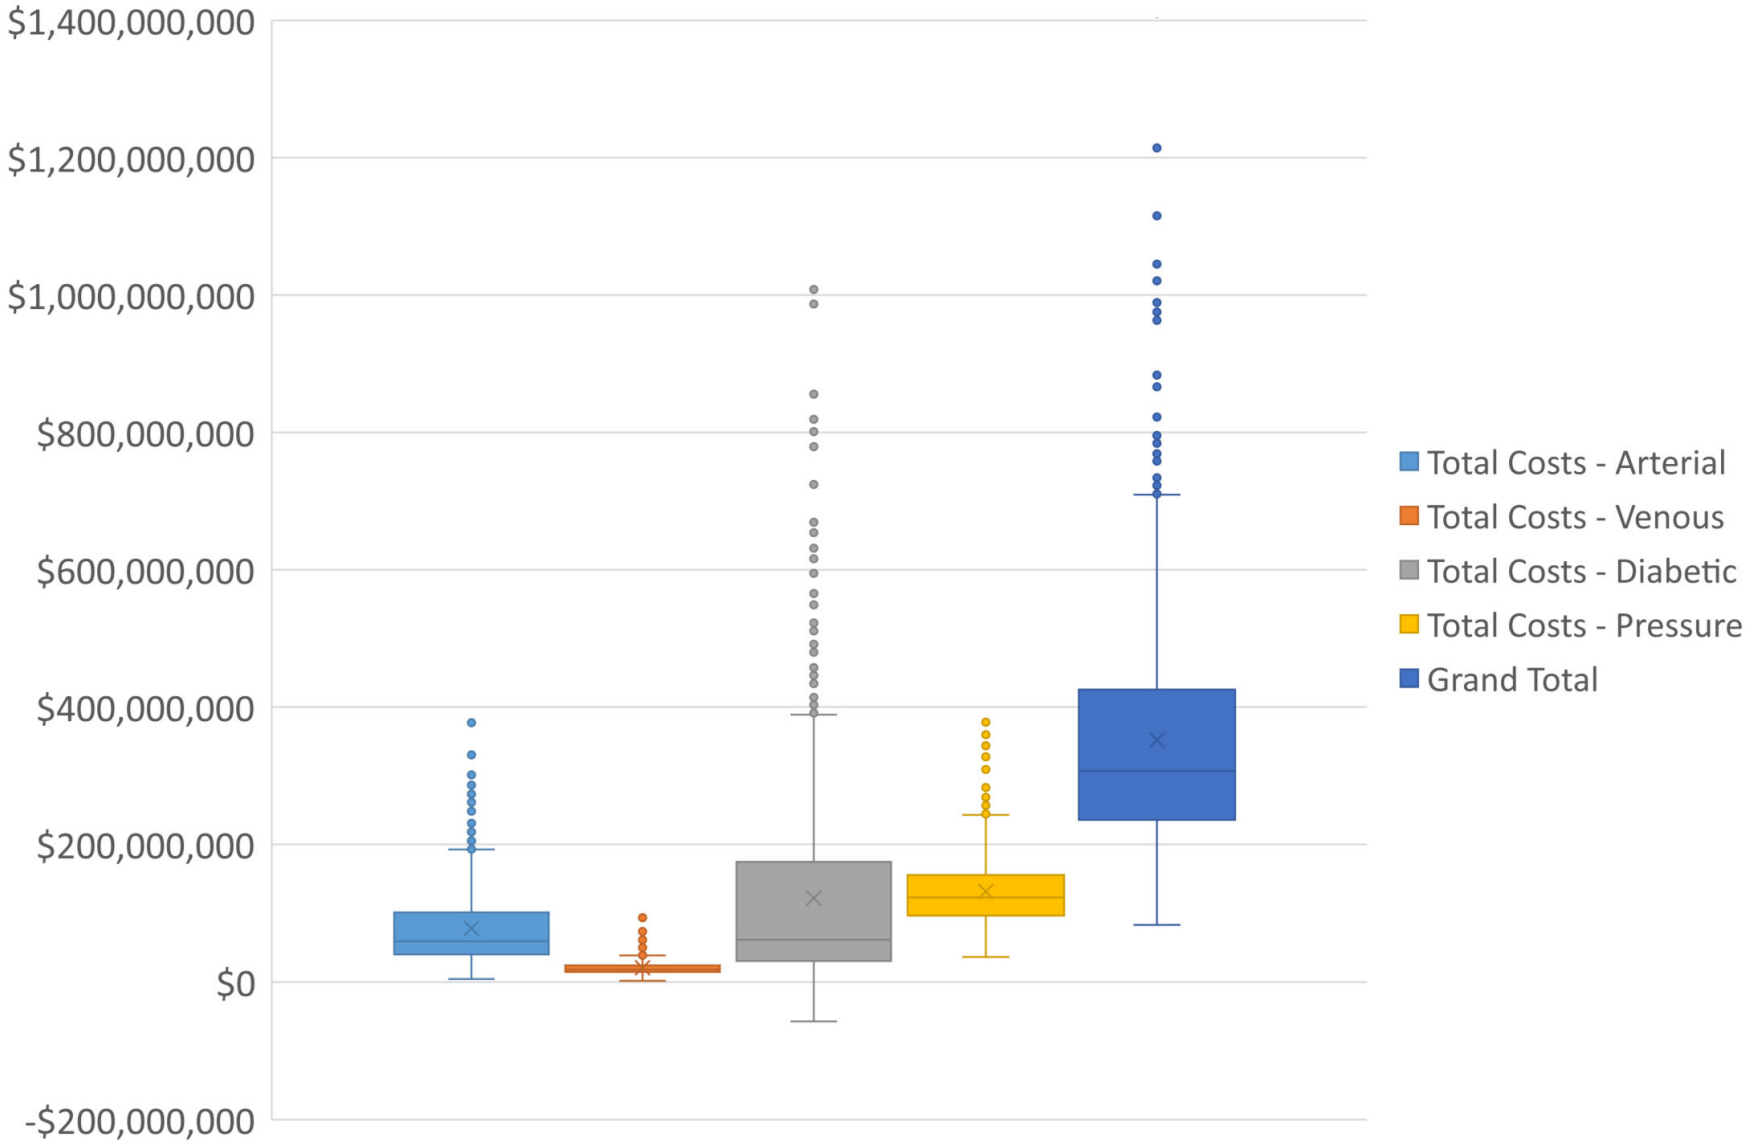

## Appendix 1. ICD-9 codes used to identify chronic wounds from national claims dataset

Venous ulcers – ICD-9-AM: 4540, 4532, 4591; ICD-10-AM: I83.0, I83.2, I87.0.

Arterial insufficiency ulcers – ICD-9-AM: 44023, 44024; ICD-10-AM: I70.23, I70.24

Diabetic ulcers – ICD-9-AM: 7071, 7078, 7079, 7854 & one of 25070, 25071, 25072 or 25073; ICD-10-AM: E10.73, E11.73, E13.73, E14.73, E10.52, E11.52, E13.52, E14.52, E09.02, E09.52, E10.69, E11.69, E13.69, E14.69

Pressure ulcers – ICD-9-AM: 7070; ICD-10-AM: L89.0, L89.1, L89.2, L89.3, L89.4, L89.5, L89.6, L89.7, L89.8, L89.9

## Appendix 1A - SAS code for calculating the local EQ-5D index score from EQ-5D-3L

\*\*\* coding of EQ-5D data: 1 = no problems, 2 = some/moderate problems, 3 = extreme problems;

\*\*\* mo = mobility, sc = self-care, ua = usual activity, pd = pain/discomfort, ad = anxiety/depression;

data new; set new;

if mo=2 then m2=1; else m2=0;

if mo=3 then m3=1; else m3=0;

if sc=2 then s2=1; else s2=0;

if sc=3 then s3=1; else s3=0;

if ua=2 then u2=1; else u2=0;

if ua=3 then u3=1; else u3=0;

if pd=2 then p2=1; else p2=0;

if pd=3 then p3=1; else p3=0;

if ad=2 then a2=1; else a2=0;

if ad=3 then a3=1; else a3=0;

if mo=3 or sc=3 or ua=3 or pd=3 or ad=3 then n3=1; else n3=0;

EQ\_index = 1 - 0.1678\*m2 - 0.3040\*m3 - 0.1615\*s2 - 0.3465\*s3 - 0.2555\*u2 - 0.3209\*u3 - 0.1462\*p2 - 0.2291\*p3 - 0.1501\*a2 - 0.2784\*a3 - 0.2905\*n3;

if mo=. or sc=. or ua=. or pd=. or ad=. then EQ\_index =. ;

drop m2 m3 s2 s3 u2 u3 p2 p3 a2 a3 n3; run;

**Appendix 2. The incidence rates by age band, at risk population and incident cases**

|          | age band | at risk population | incidence rate per 100,000 | annual incident cases |
|----------|----------|--------------------|----------------------------|-----------------------|
| Venous   | <40      | 1,957,020          | 1.2                        | 23                    |
|          | 40-49    | 614,941            | 7                          | 43                    |
|          | 50-59    | 614,492            | 19.9                       | 122                   |
|          | 60-69    | 466,620            | 37.5                       | 175                   |
|          | 70-79    | 211,447            | 66.7                       | 141                   |
|          | ≥80      | 101,276            | 91.8                       | 93                    |
|          | total    | 3,965,796          |                            | 598                   |
| Arterial | <40      | 1,957,020          | 1.1                        | 22                    |
|          | 40-49    | 614,941            | 15.6                       | 96                    |
|          | 50-59    | 614,492            | 67.5                       | 415                   |
|          | 60-69    | 466,620            | 143.4                      | 669                   |
|          | 70-79    | 211,447            | 246.4                      | 521                   |
|          | ≥80      | 101,276            | 477.9                      | 484                   |
|          | total    | 3,965,796          |                            | 2,206                 |
| Diabetic | <40      | 1,957,020          | 5.8                        | 114                   |
|          | 40-49    | 614,941            | 56.6                       | 348                   |
|          | 50-59    | 614,492            | 175.8                      | 1,080                 |
|          | 60-69    | 466,620            | 368.6                      | 1,720                 |
|          | 70-79    | 211,447            | 758.6                      | 1,604                 |
|          | ≥80      | 101,276            | 1791.1                     | 1,814                 |
|          | total    | 3,965,796          |                            | 6,680                 |
| Pressure | <40      | 1,957,020          | 4.8                        | 94                    |
|          | 40-49    | 614,941            | 22                         | 135                   |
|          | 50-59    | 614,492            | 74.4                       | 457                   |
|          | 60-69    | 466,620            | 236.4                      | 1,103                 |
|          | 70-79    | 211,447            | 844.2                      | 1,785                 |
|          | ≥80      | 101,276            | 3646.5                     | 3,693                 |
|          | total    | 3,965,796          |                            | 7,268                 |

**Appendix 3. EQ-5D scores by type of wound and time from Singapore Wound Registry**

| Mean (Std. Dev.) | Baseline            | month 1             | month 3             | month 6             |
|------------------|---------------------|---------------------|---------------------|---------------------|
| Venous           | 0.57 (0.34) (n=255) | 0.68 (0.31) (n=235) | 0.74 (0.30) (n=242) | 0.74 (0.30) (n=243) |
| Arterial         | 0.44 (0.40) (n=354) | 0.52 (0.42) (n=311) | 0.54 (0.45) (n=303) | 0.58 (0.44) (n=291) |
| Diabetic         | 0.64 (0.42) (n=139) | 0.71 (0.44) (n=128) | 0.72 (0.38) (n=129) | 0.74 (0.43) (n=126) |
| Pressure         | -0.18 (0.50) (n=51) | 0.00 (0.56) (n=43)  | 0.18 (0.54) (n=38)  | 0.11 (0.59) (n=40)  |

**Appendix 4. Mean duration of wounds in days, by age band; Mean (Standard Deviation)**

| Age Band | Venous (n=150) | Diabetic (n=245) | Pressure (n=24) |
|----------|----------------|------------------|-----------------|
| <40      | 133 (92)       | 177 (88)         | 55 (11)         |
| 40-49    | 129 (109)      | 325 (550)        | 86 (24)         |
| 50-59    | 331 (394)      | 224 (216)        | 115 (1)         |
| 60-69    | 223 (269)      | 314 (430)        | 103 (59)        |
| 70-79    | 307 (438)      | 256 (305)        | 105 (115)       |
| ≥80      | 205 (153)      | 160 (138)        | 62 (52)         |

# values for Diabetic were used to proxy 'Arterial' wounds

## Appendix 5. Cohort of all hospital admissions for a relevant chronic wound 2012 to 2019

|                               | All         | No wound    | Arterial    | Venous      | Diabetic    | Pressure    |
|-------------------------------|-------------|-------------|-------------|-------------|-------------|-------------|
| Number                        | 5,196,899   | 5,047,162   | 14,536      | 19,210      | 16,999      | 49,879      |
| Age, mean (st dev)            | 50.4 (26.9) | 49.6 (26.8) | 75 (13.3)   | 72.1 (17.1) | 72.4 (15.7) | 81.7 (13)   |
| Male                          | 49%         | 48%         | 56%         | 57%         | 58%         | 50%         |
| CCI score (mean)              | 4.1         | 4.1         | 6.1         | 4.7         | 5.9         | 4.4         |
| Chinese                       | 64%         | 64%         | 63%         | 60%         | 54%         | 71%         |
| Malay                         | 14%         | 14%         | 17%         | 16%         | 21%         | 13%         |
| Indian                        | 10%         | 10%         | 11%         | 13%         | 13%         | 6%          |
| Others                        | 12%         | 12%         | 9%          | 11%         | 12%         | 10%         |
| COPD                          | 7%          | 7%          | 6%          | 5%          | 5%          | 8%          |
| Diabetes Mellitus             | 42%         | 42%         | 82%         | 57%         | 100%        | 40%         |
| Hypertension                  | 69%         | 68%         | 92%         | 77%         | 88%         | 76%         |
| Dyslipidemia                  | 61%         | 61%         | 84%         | 67%         | 86%         | 59%         |
| Heart Failure                 | 14%         | 14%         | 33%         | 21%         | 27%         | 14%         |
| Renal Failure                 | 24%         | 23%         | 49%         | 30%         | 44%         | 21%         |
| Stroke                        | 17%         | 17%         | 27%         | 19%         | 20%         | 40%         |
| Dementia                      | 6%          | 6%          | 7%          | 5%          | 4%          | 33%         |
| Major Depression              | 6%          | 6%          | 5%          | 5%          | 6%          | 8%          |
| Parkinson                     | 3%          | 3%          | 2%          | 2%          | 1%          | 17%         |
| Schizophrenia                 | 4%          | 4%          | 1%          | 3%          | 2%          | 4%          |
| Length of Stay, mean (st dev) | 6.5(17)     | 6.3 (16.7)  | 16.2 (20.2) | 9.8 (16)    | 14 (18.6)   | 16.8 (25.2) |

Appendix 6. Results of generalised linear model (GLM) with a gamma link function to estimate excess length of stay

|                                        | All       | No wound   | Arterial            | Venous              | Diabetic            | Pressure            |
|----------------------------------------|-----------|------------|---------------------|---------------------|---------------------|---------------------|
| Number                                 | 5,196,899 | 5,054,937  | 14,536              | 19,210              | 16,999              | 49,879              |
| Length of Stay, mean (st dev)          | 6.5 (17)  | 6.3 (16.7) | 16.2 (20.2)         | 9.8 (16)            | 14 (18.6)           | 16.8 (25.2)         |
| Coefficient (95% CI)                   | -         | -          | 0.722 (0.690,0.754) | 0.303 (0.272,0.333) | 0.701 (0.669,0.733) | 0.543 (0.516,0.570) |
| Rate ratio of length of stay (95% CI)  | -         | -          | 2.059 (1.993,2.126) | 1.353 (1.993,2.126) | 2.015 (1.952,2.081) | 1.722 (1.676,1.769) |
| Estimated mean length of stay (95% CI) | -         | -          | 2.233 (2.215,2.252) | 2.232 (2.215,2.252) | 2.226 (2.208,2.245) | 2.234 (2.216,2.253) |
| Expected length of stay (95% CI)       | -         | -          | 4.598 (4.414,4.788) | 3.02 (4.414,4.788)  | 4.485 (4.31,4.672)  | 3.847 (3.714,3.986) |
| Excess length of stay (95% CI)         | -         | -          | 2.365 (2.199,2.536) | 0.788 (2.199,2.536) | 2.259 (2.102,2.427) | 1.613 (1.498,1.733) |

## Appendix 6a – usage and costs of outpatient services for patients with chronic wounds

|                                                       | with consult        |                       | without consult       |                        |
|-------------------------------------------------------|---------------------|-----------------------|-----------------------|------------------------|
|                                                       | mean (sd)           | 95% CI                | mean (sd)             | 95% CI                 |
| Total annual costs                                    |                     |                       |                       |                        |
| Costs of Outpatient with Consult - Arterial           | \$908.13 (\$778.27) | (\$815.39, \$1000.86) | \$992.01 (\$1241.53)  | (\$844.08, \$1139.94)  |
| Costs of Outpatient with Consult - Venous             | \$685.73 (\$575.30) | (\$603.62, \$767.84)  | \$2381.98 (\$2449.41) | (\$2024.72, \$2739.24) |
| Costs of Outpatient with Consult - Diabetic           | \$918.06 (\$823.40) | (\$752.11, \$1084.01) | \$1068.85 (\$905.06)  | (\$888.33, \$1249.36)  |
| Costs of Outpatient with Consult - Pressure           | \$702.40 (\$525.63) | (\$368.43, \$1036.37) | \$1111.98 (\$1330.34) | (-\$118.38, \$2342.34) |
| Annual visits                                         | mean (sd)           | 95% CI                | mean (sd)             | 95% CI                 |
| No. of Visits of Outpatient with Consult - Arterial   | 8.249 (6.107)       | (7.521, 8.977)        | 8.454 (6.362)         | (7.696, 9.212)         |
| No. of Visits of Outpatient with Consult - Venous     | 5.874 (5.932)       | (5.028, 6.721)        | 23.639 (18.989)       | (20.870, 26.409)       |
| No. of Visits of Outpatient with Consult - Diabetic   | 8.102 (6.209)       | (6.857, 9.347)        | 14.172 (51.225)       | (4.008, 24.336)        |
| No. of Visits of Outpatient with Consult - Pressure   | 6.5 (4.681)         | (3.526, 9.474)        | 9.714 (10.797)        | (-0.271, 19.700)       |
| Cost per Visit                                        | mean (sd)           | 95% CI                | mean (sd)             | 95% CI                 |
| Costs per Visit of Outpatient with Consult - Arterial | \$110.44 (\$46.69)  | (\$104.88, \$116.01)  | \$117.28 (\$87.66)    | (\$106.84, \$127.73)   |
| Costs per Visit of Outpatient with Consult - Venous   | \$133.24 (\$81.05)  | (\$121.67, \$144.80)  | \$106.81 (\$105.11)   | (\$91.48, \$122.14)    |
| Costs per Visit of Outpatient with Consult - Diabetic | \$112.00 (\$66.26)  | (\$98.64, \$125.35)   | \$114.93 (\$39.31)    | (\$107.08, \$122.77)   |
| Costs per Visit of Outpatient with Consult - Pressure | \$111.04 (\$55.19)  | (\$75.97, \$146.10)   | \$124.14 (\$38.92)    | (\$88.14, \$160.13)    |

## Appendix 7. Cohort of all patients who accessed CHAS, Polyclinic or Emergency departments (ED) 2012 to 2019

|                                                             | CHAS      |           | Polyclinic |           | ED        |           |
|-------------------------------------------------------------|-----------|-----------|------------|-----------|-----------|-----------|
|                                                             | No Wound  | Any Wound | No Wound   | Any Wound | No Wound  | Any Wound |
| Number                                                      | 1,013,104 | 3,463     | 2,600,153  | 1,441     | 2,964,540 | 7,403     |
| Age                                                         | 49.4      | 67.9      | 37         | 65        | 36        | 68        |
| Male                                                        | 46%       | 45%       | 51%        | 57%       | 56%       | 52%       |
| CCI score                                                   | 2.6       | 4.0       | 2.1        | 4.3       | 2.0       | 5.0       |
| Chinese                                                     | 72%       | 78%       | 64%        | 61%       | 52%       | 61%       |
| Malay                                                       | 14%       | 10%       | 12%        | 13%       | 10%       | 17%       |
| Indian                                                      | 6%        | 8%        | 10%        | 20%       | 9%        | 13%       |
| Others                                                      | 9%        | 5%        | 14%        | 6%        | 30%       | 9%        |
| COPD                                                        | 3%        | 4%        | 2%         | 5%        | 3%        | 5%        |
| Diabetes Mellitus                                           | 32%       | 55%       | 28%        | 68%       | 30%       | 70%       |
| Hypertension                                                | 64%       | 82%       | 55%        | 81%       | 56%       | 83%       |
| Dyslipidemia                                                | 61%       | 72%       | 50%        | 78%       | 51%       | 77%       |
| Heart Failure                                               | 4%        | 13%       | 3%         | 15%       | 4%        | 22%       |
| Renal Failure                                               | 10%       | 24%       | 7%         | 26%       | 8%        | 39%       |
| Stroke                                                      | 8%        | 16%       | 7%         | 17%       | 8%        | 26%       |
| Dementia                                                    | 2%        | 6%        | 1%         | 6%        | 2%        | 16%       |
| Major Depression                                            | 3%        | 3%        | 2%         | 4%        | 2%        | 7%        |
| Parkinson                                                   | 1%        | 3%        | 1%         | 2%        | 1%        | 6%        |
| Schizophrenia                                               | 2%        | 2%        | 2%         | 3%        | 2%        | 3%        |
| Average no. of episodes in 12 months from wound/first visit | 3.1       | 6.2       | 1.8        | 2.8       | 1.4       | 2.6       |



**Appendix 8. Results of generalised linear model (GLM) with a Poisson link function to estimate excess use of poly-clinic services, CHAS and ED.**

|                                       |             |             |                       |
|---------------------------------------|-------------|-------------|-----------------------|
| <i>Polyclinic</i>                     | All         | No wound    | Any wound             |
| Number                                | 2601594     | 2600153     | 1441                  |
| Mean no. of episodes in 12 months, SD | 1.85(1.78)  | 1.85(1.77)  | 1.85(1.78)            |
| Median 12 month utilisation, IQR      | 1 (1-2)     | 1 (1-2)     | 2 (1-3)               |
| Coefficient                           |             |             | 0.352 (0.288,0.416)   |
| Rate ratio of Episodes, CI            |             |             | 1.423 (1.333,1.513 )  |
| Estimated mean Episodes, CI           |             |             | 2.157 (2.13,2.184 )   |
| Expected Episodes, CI                 |             |             | 3.069 (3.031 ,3.108 ) |
| Excess Episodes, CI                   |             |             | 0.912 (0.901 ,0.924 ) |
| <i>CHAS</i>                           | All         | No wound    | Any wound             |
| Number                                | 1016567     | 1013104     | 3463                  |
| Mean no. of episodes in 12 months, SD | 3.13 (3.75) | 3.12 (3.73) | 6.18 (7.30)           |
| Median 12 month utilisation, IQR      | 2 (1 - 4)   | 2 (1 - 4)   | 4(2 -8)               |
| Coefficient                           |             |             | 0.685 (0.669 , 0.701) |
| Rate ratio of Episodes, CI            |             |             | 1.984 (1.952 , 2.016) |
| Estimated mean Episodes, CI           |             |             | 3.596 (3.578 , 3.614) |
| Expected Episodes, CI                 |             |             | 7.134 (7.099 , 7.169) |
| Excess Episodes, CI                   |             |             | 3.538 (3.521 , 3.556) |
| <i>ED</i>                             | All         | No wound    | Any wound             |
| Number                                | 2971943     | 2964540     | 7403                  |
| Mean no. of episodes in 12 months, SD | 1.38(1.17)  | 1.38(1.16)  | 1.38(1.17)            |
| Median 12 month utilisation, IQR      | 1 (1-1)     | 1 (1-1)     | 2 (1-3)               |
| Coefficient                           |             |             | 0.343 (0.319 ,0.367 ) |
| Rate ratio of Episodes, CI            |             |             | 1.410 (1.376 ,1.444 ) |
| Estimated mean Episodes, CI           |             |             | 1.531 (1.515 ,1.547 ) |
| Expected Episodes, CI                 |             |             | 2.159 (2.136 ,2.181 ) |
| Excess Episodes, CI                   |             |             | 0.628 (0.621 ,0.634 ) |

Appendix 9 Boxplots of all outcomes estimated from COI model

### number of bed days used

■ bed days arterial 
 ■ bed days venous 
 ■ bed days diabetic 
 ■ bed days pressure

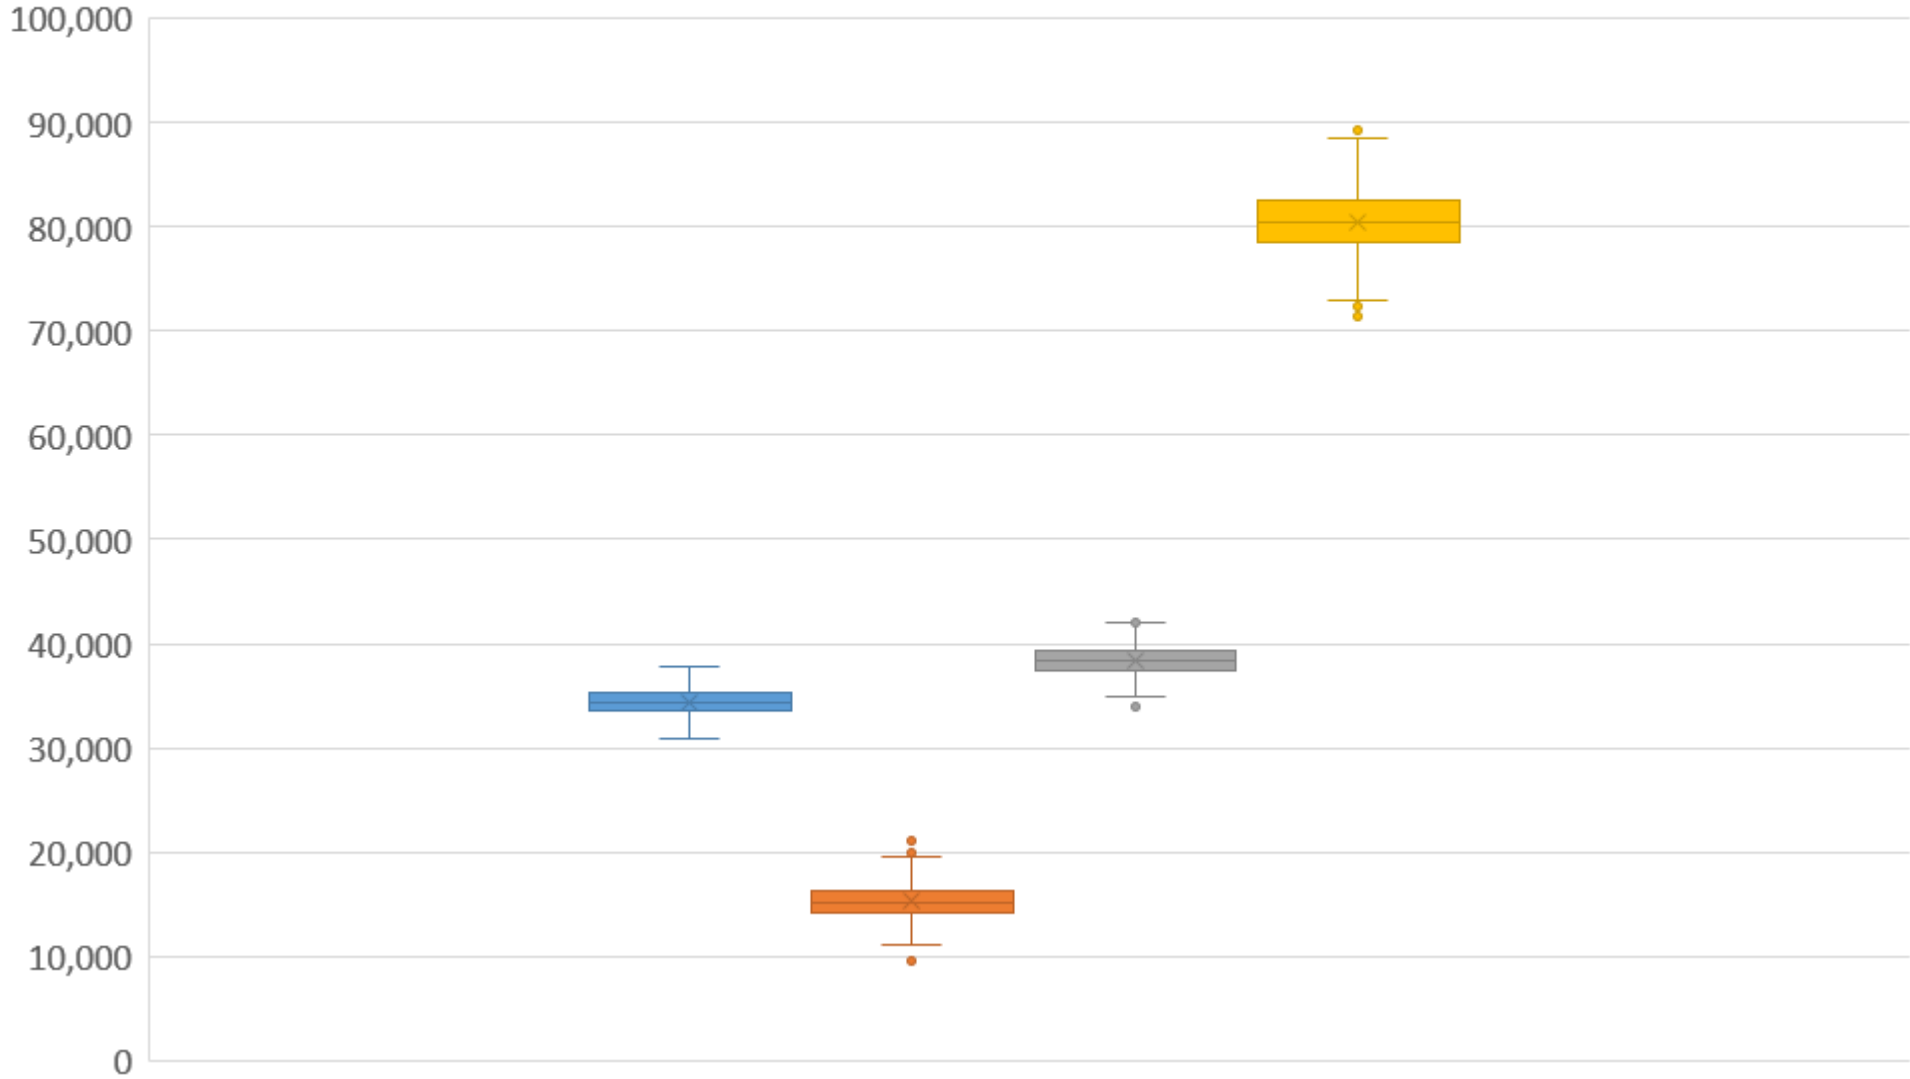

### costs of bed days used

■ costs bed days arterial ■ costs bed days venous ■ costs bed days diabetic ■ costs bed days pressure

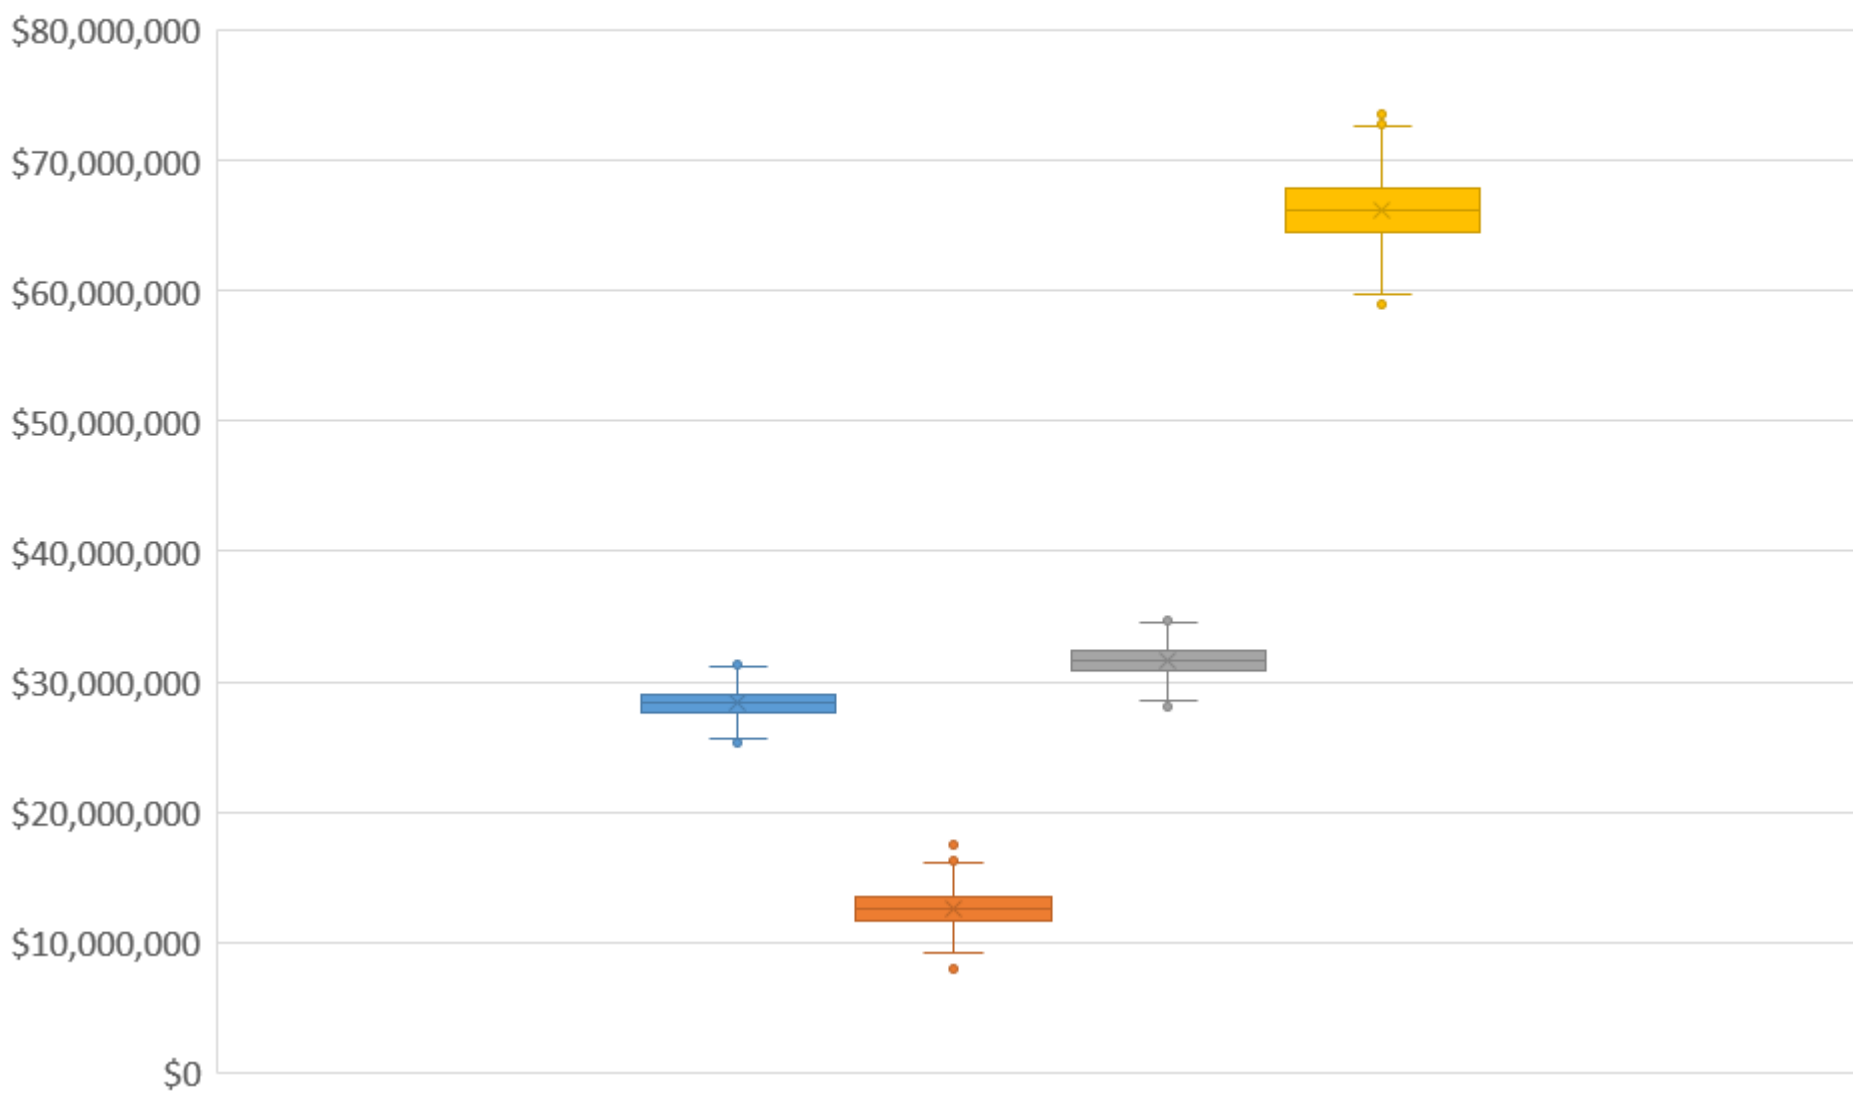

### costs of outpatients services used

■ OP venous ■ OP diabetic ■ OP pressure ■ ED visits

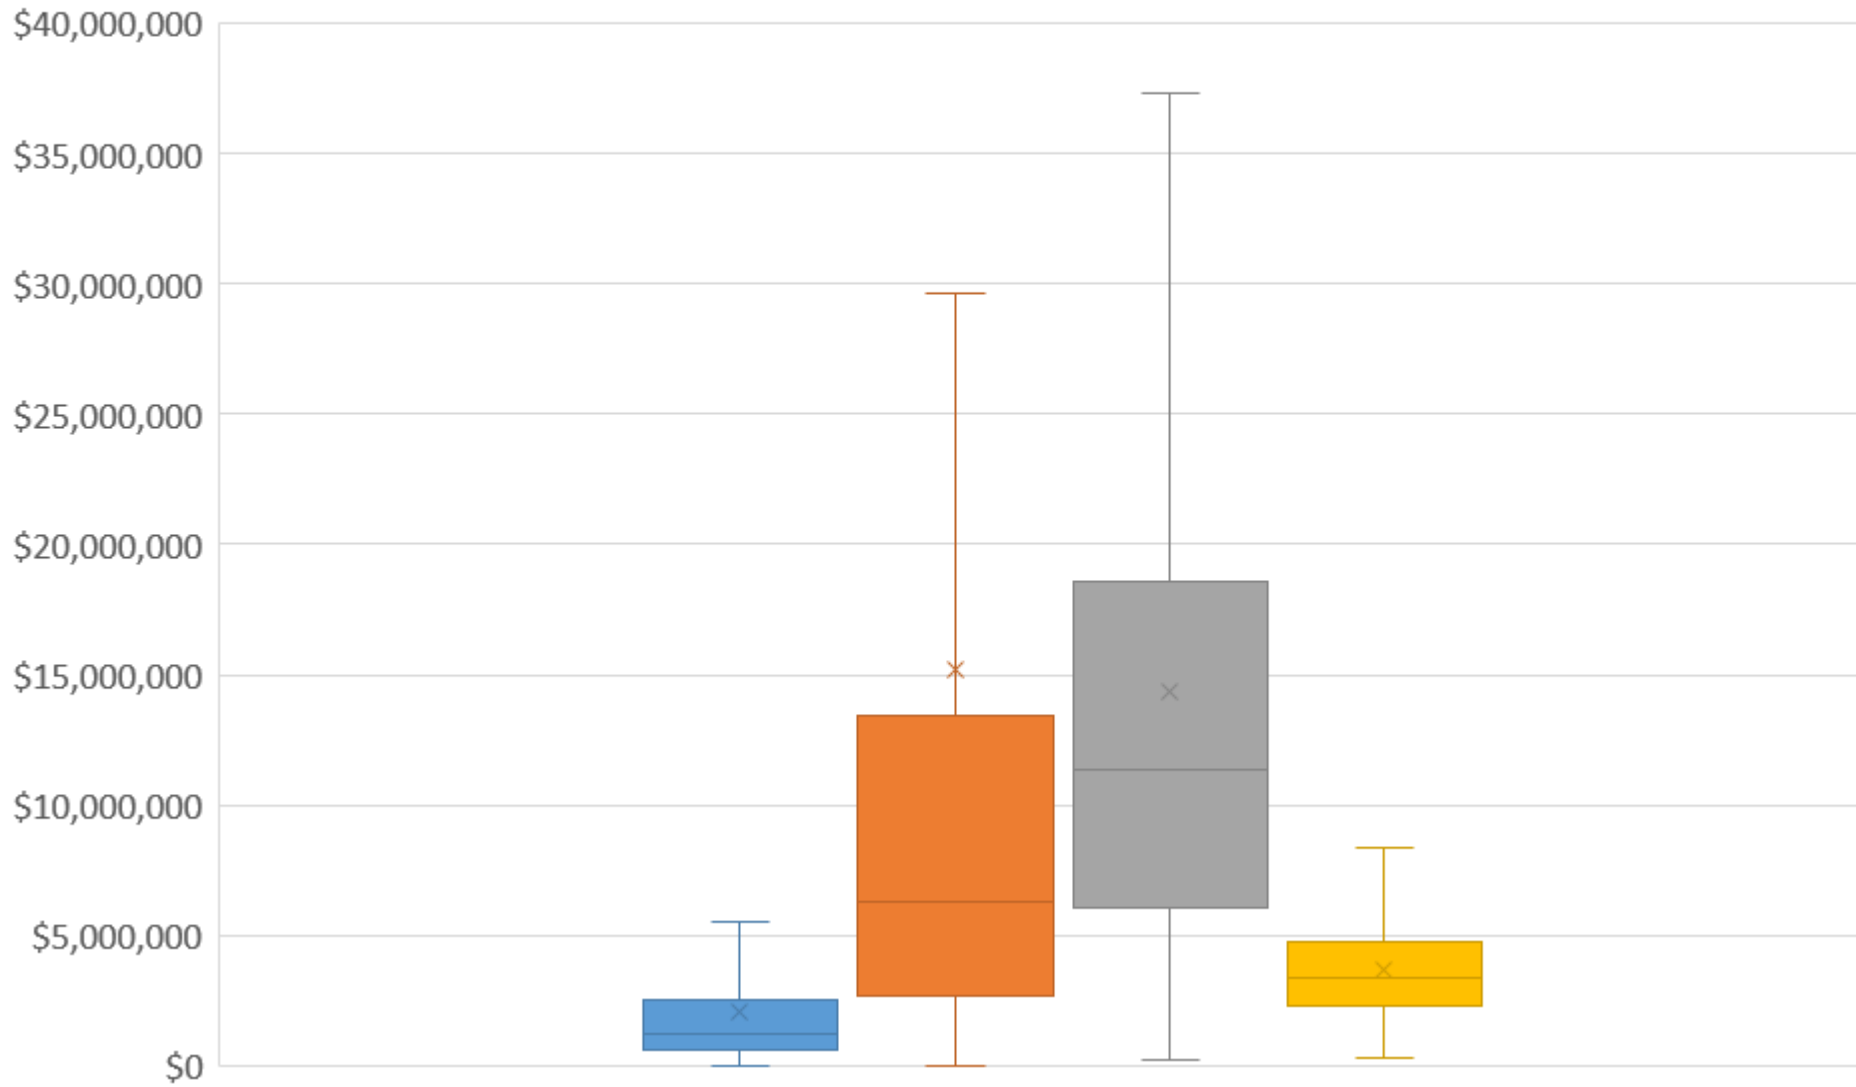

1  
2  
3  
4  
5  
6  
7  
8  
9  
10  
11  
12  
13  
14  
15  
16  
17  
18  
19  
20  
21  
22  
23  
24  
25  
26  
27  
28  
29  
30  
31  
32  
33  
34  
35  
36  
37  
38  
39  
40  
41  
42  
43  
44  
45  
46

### costs of GP, POLY & CHAS

■ CHAS episodes of care ■ Poly clinic visits ■ ED visits

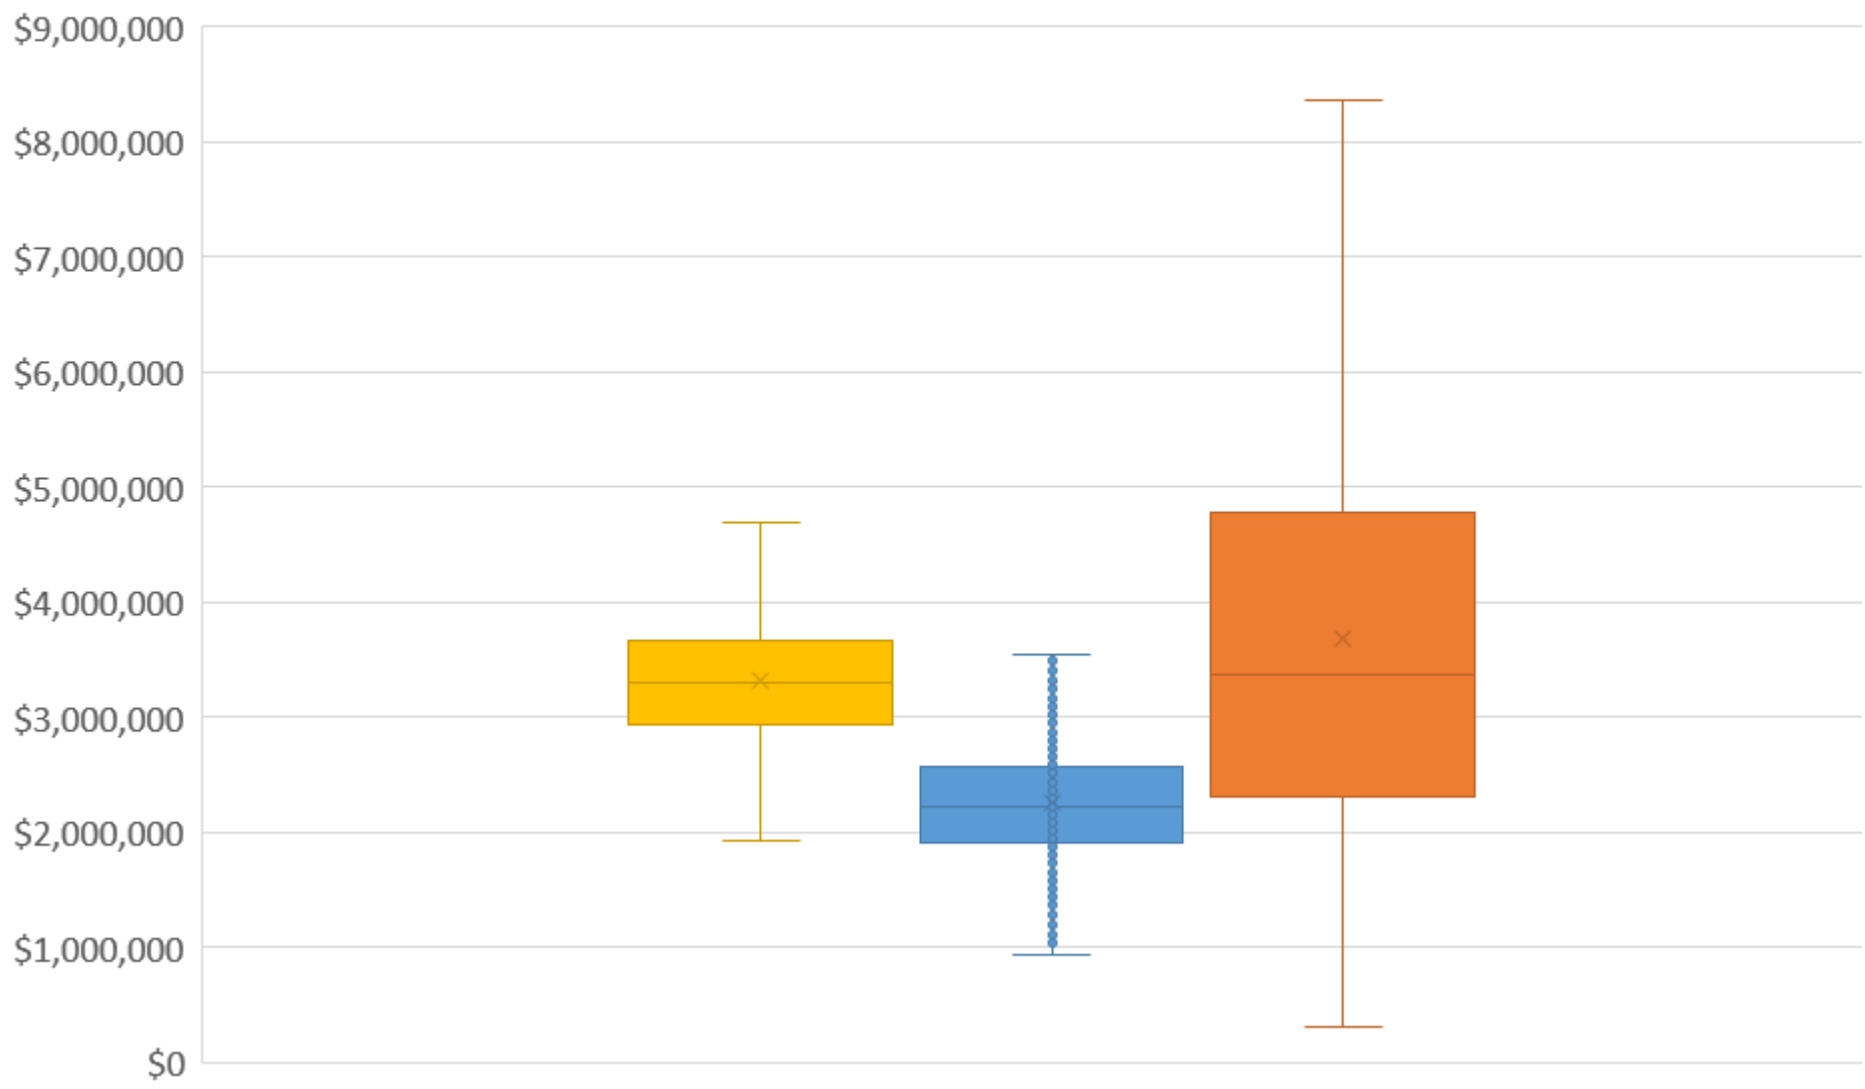

# Number of QALYs foregone

■ QALYS arterial ■ QALYS venous ■ QALYS diabetic ■ QALYS pressure

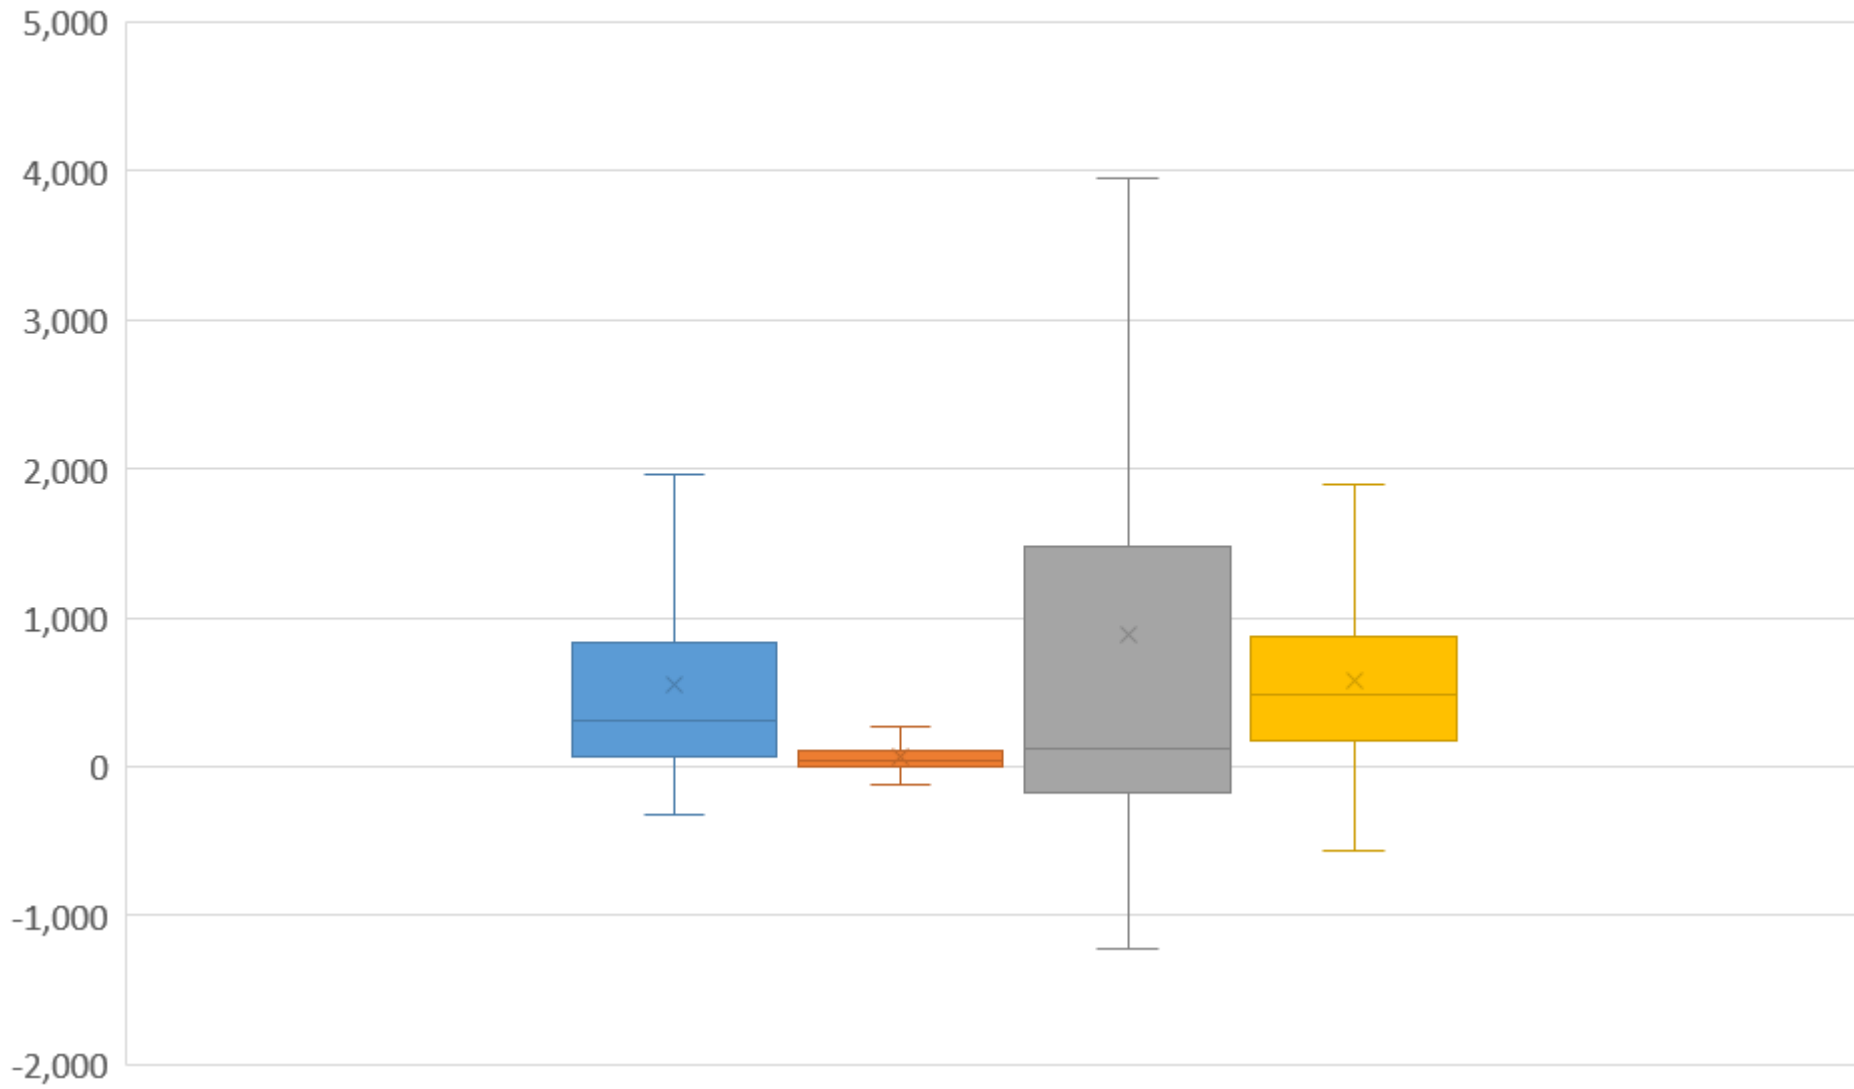

# Value of QALYs foregone

■ value QALYS arterial ■ value QALYS venous ■ value QALYS diabetic ■ value QALYS pressure

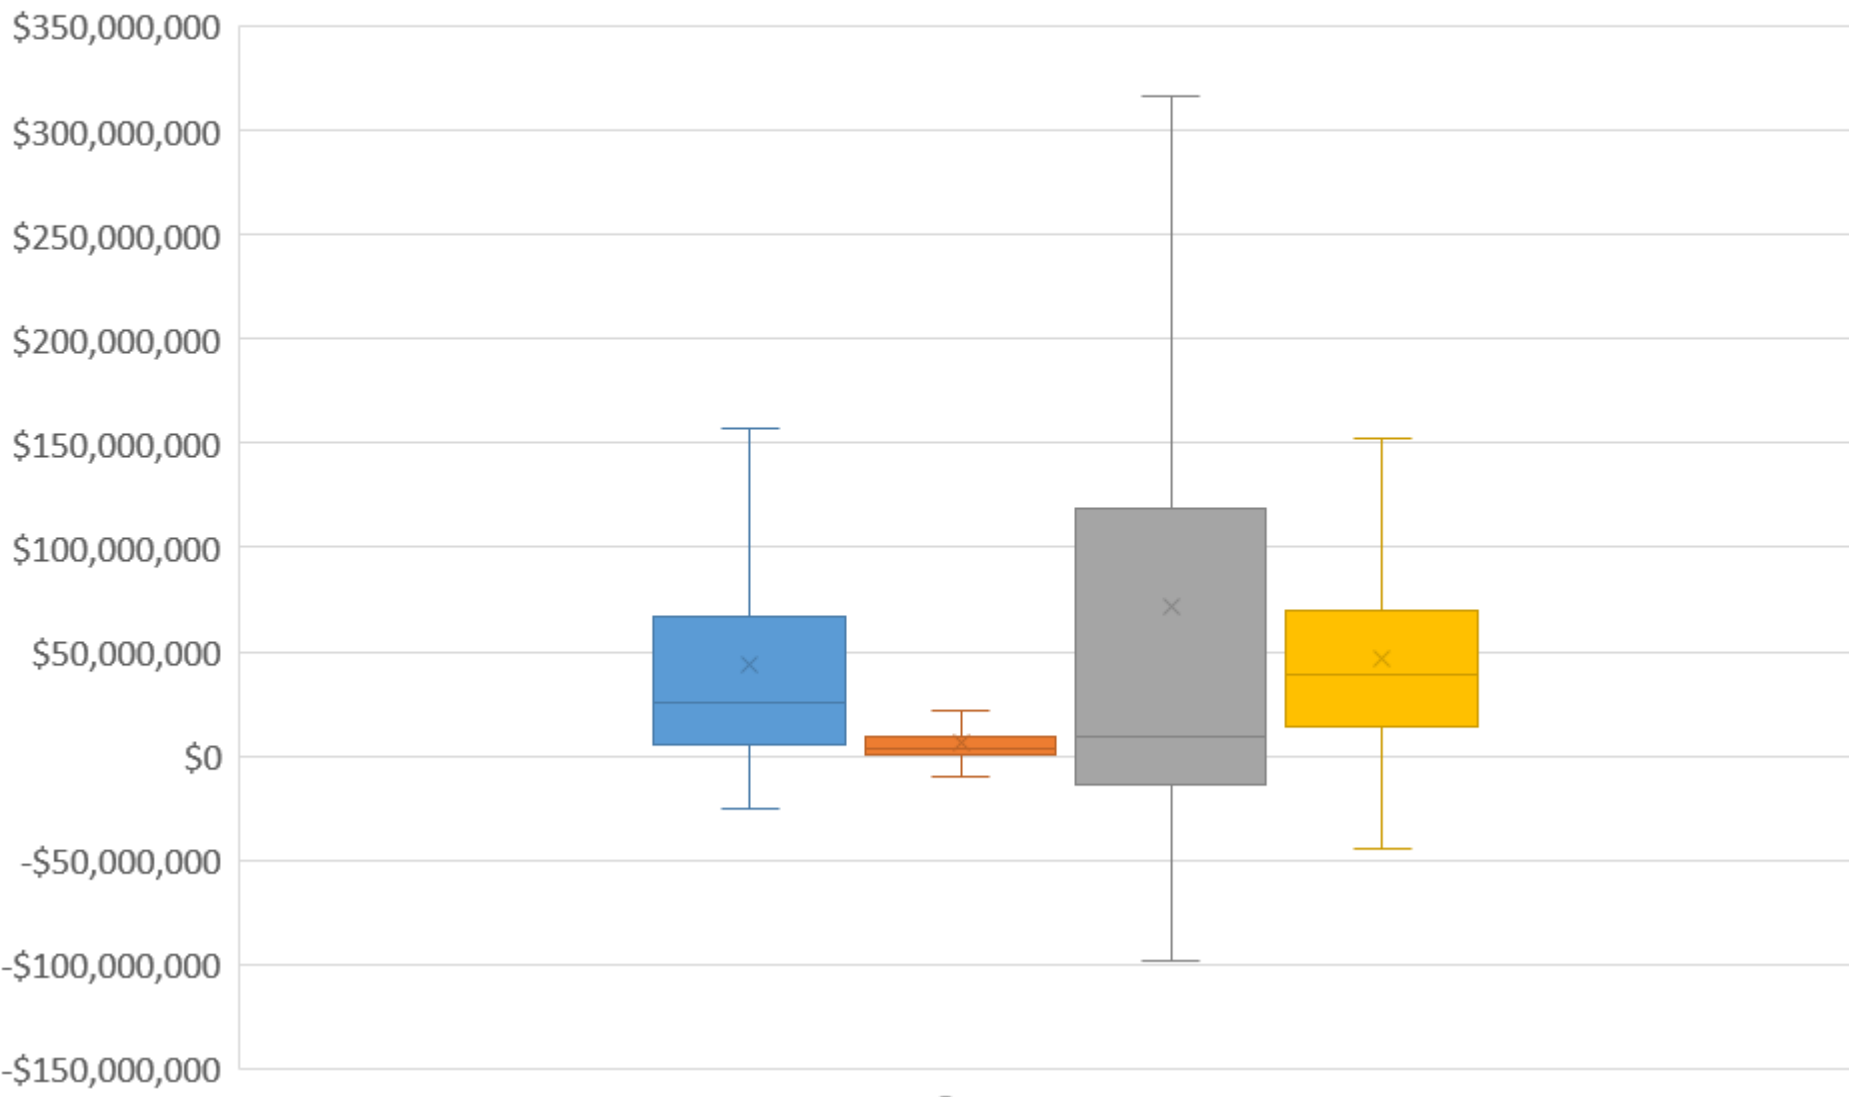

# BMJ Open

## Chronic Wounds in a Multi-Ethnic Asian Population. A Cost of Illness Study.

|                                 |                                                                                                                                                                                                                                                                                                                                                                                                                                                                                                                                                                                                                                                                                                                                                                                                                                       |
|---------------------------------|---------------------------------------------------------------------------------------------------------------------------------------------------------------------------------------------------------------------------------------------------------------------------------------------------------------------------------------------------------------------------------------------------------------------------------------------------------------------------------------------------------------------------------------------------------------------------------------------------------------------------------------------------------------------------------------------------------------------------------------------------------------------------------------------------------------------------------------|
| Journal:                        | <i>BMJ Open</i>                                                                                                                                                                                                                                                                                                                                                                                                                                                                                                                                                                                                                                                                                                                                                                                                                       |
| Manuscript ID                   | bmjopen-2022-065692.R1                                                                                                                                                                                                                                                                                                                                                                                                                                                                                                                                                                                                                                                                                                                                                                                                                |
| Article Type:                   | Original research                                                                                                                                                                                                                                                                                                                                                                                                                                                                                                                                                                                                                                                                                                                                                                                                                     |
| Date Submitted by the Author:   | 05-Jan-2023                                                                                                                                                                                                                                                                                                                                                                                                                                                                                                                                                                                                                                                                                                                                                                                                                           |
| Complete List of Authors:       | Graves, Nicholas; Duke-NUS Medical School<br>Ganesan, Ganga; Ministry of Health Singapore<br>Tan, Kelvin; Ministry of Health Singapore, Policy Research & Evaluation Division<br>Goh, Orlanda; Singapore General Hospital, Department of Internal Medicine<br>Ho, Jackie; National University of Singapore<br>Chong, Tze; Singapore General Hospital,<br>Bishnoi, Priya; A*STAR,<br>Carmody, David; Singapore General Hospital, Department of Internal Medicine<br>Yuh, Ang Shin; Singapore General Hospital<br>Ng, Yi Zhen; Skin Research Institute of Singapore,<br>Lo, Zhiwen; National Healthcare Group Woodlands Health Campus<br>Enming, Yong; Tan Tock Seng Hospital<br>Abu Bakar Aloweni, Fazila; Singapore General Hospital, Nursing Division<br>Zifei, Wang; Skin Research Institute of Singapore<br>Harding, Keith; A*STAR |
| <b>Primary Subject Heading</b>: | Health economics                                                                                                                                                                                                                                                                                                                                                                                                                                                                                                                                                                                                                                                                                                                                                                                                                      |
| Secondary Subject Heading:      | Health policy, Health services research, Epidemiology                                                                                                                                                                                                                                                                                                                                                                                                                                                                                                                                                                                                                                                                                                                                                                                 |
| Keywords:                       | GENERAL MEDICINE (see Internal Medicine), HEALTH ECONOMICS, HEALTH SERVICES ADMINISTRATION & MANAGEMENT, WOUND MANAGEMENT                                                                                                                                                                                                                                                                                                                                                                                                                                                                                                                                                                                                                                                                                                             |
|                                 |                                                                                                                                                                                                                                                                                                                                                                                                                                                                                                                                                                                                                                                                                                                                                                                                                                       |

SCHOLARONE™  
Manuscripts





I, the Submitting Author has the right to grant and does grant on behalf of all authors of the Work (as defined in the below author licence), an exclusive licence and/or a non-exclusive licence for contributions from authors who are: i) UK Crown employees; ii) where BMJ has agreed a CC-BY licence shall apply, and/or iii) in accordance with the terms applicable for US Federal Government officers or employees acting as part of their official duties; on a worldwide, perpetual, irrevocable, royalty-free basis to BMJ Publishing Group Ltd ("BMJ") its licensees and where the relevant Journal is co-owned by BMJ to the co-owners of the Journal, to publish the Work in this journal and any other BMJ products and to exploit all rights, as set out in our [licence](#).

The Submitting Author accepts and understands that any supply made under these terms is made by BMJ to the Submitting Author unless you are acting as an employee on behalf of your employer or a postgraduate student of an affiliated institution which is paying any applicable article publishing charge ("APC") for Open Access articles. Where the Submitting Author wishes to make the Work available on an Open Access basis (and intends to pay the relevant APC), the terms of reuse of such Open Access shall be governed by a Creative Commons licence – details of these licences and which [Creative Commons](#) licence will apply to this Work are set out in our licence referred to above.

Other than as permitted in any relevant BMJ Author's Self Archiving Policies, I confirm this Work has not been accepted for publication elsewhere, is not being considered for publication elsewhere and does not duplicate material already published. I confirm all authors consent to publication of this Work and authorise the granting of this licence.

1 **Chronic Wounds in a Multi-Ethnic Asian Population. A Cost of Illness Study.**

2  
3  
4 Nicholas Graves. Health Services & Systems Research, Duke-NUS Medical School, Singapore.

5  
6 Ganga Ganesan. Policy and Research Division, Ministry of Health, Singapore.

7  
8  
9 Kelvin Tan. Policy and Research Division, Ministry of Health, Singapore.

10  
11  
12 Orlanda Qi Mei Goh. Department of Internal Medicine, Singapore General Hospital, Singapore.

13  
14 Jackie Ho. Department of Cardiac, Thoracic and Vascular Surgery, National University Health System,  
15 Singapore, Singapore.

16  
17  
18 Chong Tze Tec. Department of Vascular Surgery, Singapore General Hospital.

19  
20  
21 Priya Bishnoi. Wound Care Innovation for the Tropics Programme, Skin Research Institute of Singapore,  
22 A\*STAR, Singapore.

23  
24  
25 David Carmody. Department of Internal Medicine, Singapore General Hospital, Singapore.

26  
27  
28 Ang Shin Yuh. Singapore General Hospital, Singapore.

29  
30  
31 Ng Yi Zhen. Wound Care Innovation for the Tropics Programme, Skin Research Institute of Singapore,  
32 A\*STAR, Singapore.

33  
34  
35 Zhiwen Lo. Vascular Surgery Service, Tan Tock Seng Hospital, Singapore.

36  
37  
38 Yong Enming. Vascular Surgery Service, Tan Tock Seng Hospital, Singapore.

39  
40  
41 Fazila Binte Abu Bakar. Aloweni Singapore General Hospital, Singapore.

42  
43 Wang Zifei. Wound Care Innovation for the Tropics Programme, Skin Research Institute of Singapore,  
44 A\*STAR, Singapore.

45  
46  
47 Keith Harding. Wound Care Innovation for the Tropics Programme, Skin Research Institute of Singapore,  
48 A\*STAR, Singapore.

49  
50  
51 Corresponding. Nicholas Graves Professor of Health Economics | Deputy Director Health Services &  
52 Systems Research, Duke-NUS Medical School | 8 College Road, Singapore 169857 | +65 8333  
53 5906 | n.graves@duke-nus.edu.sg | www.duke-nus.edu.sg

54  
55  
56 Words. 3500

## Abstract

Objective. To estimate the 'cost of illness' arising from chronic wounds in Singapore.

Design. Incidence based cost of illness study using evidence from a range of sources.

Setting: Singapore health services.

Participants. We consider 3.49 million Singapore citizens and permanent residents. There are 16,752 new individuals with a chronic wound in 2017, with 598 venous ulcers, 2,206 arterial insufficiency ulcers, 6,680 diabetic ulcers and 7,268 pressure injuries.

Primary outcome measures expressed in monetary terms are the: value of all hospital bed days lost for the population; monetary value of QALYs lost in the population; costs of all outpatient visits; and, costs of all poly clinic, use of community health assist scheme (CHAS) and emergency departments (ED) visits. Intermediate outcomes that inform the primary outcomes are also estimated.

Results: Total annual cost of illness was \$350 million (range \$72 to 1,779 million). With 168,503 acute bed days taken up annually (range 141,966 to 196,032) that incurred costs of \$139 million (range 117 to 161 million). Total costs to health services were \$184 million (range \$120 to \$1,179 million). Total annual costs of lost health were 2,077 QALYS (range -2,657 to 29,029) valued at \$166 million (range -212 to 2,399 million).

Conclusions. The costs of chronic wounds are large to Singapore. Many of them could be avoided by making positive investments in integrated and comprehensive wound prevention and treatment programmes.

### Strengths and limitations of this study

- Reliable and relevant data sources were used to update the results
- First study to quantify the national cost of chronic wounds in a multi-ethnic Asian population
- Some important costs were excluded as no information was available
- The sample size for the preference based utility weights for QALYS were small
- Some outcomes were not adjusted for co-morbidities and so might overstate the true costs.

## 1 Introduction

2  
3  
4 Chronic wounds are those that fail to heal in a time sufficient for 'normal' healing. They tend to present as a  
5 co-morbid rather than primary condition among older individuals. Other risk factors are diabetes, poor  
6 nutrition, incontinence and reduced mobility [1]. They have been described as causing a 'silent epidemic'  
7 that affects a large proportion of the world's population [2]. Chronic wounds are prevalent among vulnerable  
8 individuals living at home and residents of long-term care facilities. They are commonly associated with  
9 extended hospital stays but patient safety programmes have reduced healthcare associated events [3].  
10  
11  
12  
13  
14

15 The burden of cost is particularly large [4] with 3% of the total NHS budget [5] and 4% of health care  
16 expenditure in Scandinavian countries used to manage the consequences of chronic wounds [6]. The goal of  
17 reducing the prevalence of chronic wounds has failed to attract sustained investment from those who pay for  
18 health services [7]. This contrasts with other major diseases, where payers are prepared to invest in 'cancer  
19 moonshots' for example [8], that will hopefully lead to better outcomes the future. This inequity is puzzling  
20 as the technology for reducing chronic wounds is available now, saves more than it costs to implement [9],  
21 and will cause large and certain gains in health outcomes.  
22  
23  
24  
25  
26  
27

28 Ulcers of the skin are the most common type of chronic wounds and include venous ulcers, arterial ulcers,  
29 diabetic foot ulcers and pressure ulcers or injuries. There are associated with a wide range of economic costs  
30 [2]. Affected individuals require frequent evidence-based treatments and if the condition becomes  
31 overwhelming an admission to hospital is inevitable. Many patients will be admitted for other reasons, and  
32 the wound may independently prolong hospital stay [10]. Debridement, minor amputations, and major  
33 amputations are common among higher risk groups [11, 12]. Chronic wounds are prevalent among residents  
34 of aged care facilities and will incur additional costs for staff time and consumables. Home nursing services  
35 as well as charities and volunteer groups that support the frail and elderly in their homes also manage  
36 patients [13]. Out of pocket expenditures will arise for patients and family members who travel to access  
37 services and purchase consumable items [14]. Productivity losses will arise as the patients are unable to  
38 perform their normal activities, be they paid or unpaid, and family members will have to take time from  
39 waged and unwaged productive activity. Health-related quality of life, which has monetary value [15], will  
40 be reduced. All these costs can be structured by a 'cost of illness' method [16].  
41  
42  
43  
44  
45  
46  
47  
48  
49  
50  
51

52 The aim of this study is to estimate the 'cost of illness' arising from chronic wounds in Singapore. Our  
53 results could be used to stimulate decision makers to invest in known prevention and management  
54 programmes. The findings will also aid researchers who wish to model the cost savings or the cost-  
55 effectiveness of specific interventions.  
56  
57  
58  
59  
60

## Method

### Scope of the Analyses

We include all resident Singapore Citizens and Permanent Residents (n=3.49M) and exclude resident foreign nationals and long-term employment pass holders (n=526,000) in 2017 [17]. Singapore has a multi-ethnic Asian population comprising of residents who are 76% Chinese, 15% Malay and 7.5% Indian descent [18]. The perspective for this analysis includes the costs incurred by health services and the losses to health benefits, expressed as QALYs foregone. We do not represent the ‘societal’ perspective as there are no data on private out of pocket costs, but we do review this omission in the Discussion. We estimate the expected annual costs arising from incident cases of venous ulcers, arterial insufficiency ulcers, diabetic ulcers and pressure injury.

### Scope of the Modelling

We use statistical models to estimate four primary outcomes for the year 2017, see Figure 1.

#### FIGURE 1 HERE

First, are the monetary ‘*value of all hospital bed days lost for the population*’. The information used is summarised in Part A of Figure 1 and is labelled Inpatient ‘Acute Sector Costs’. Second, are the ‘*monetary value of QALYs lost in the population*’. The information used is summarised in Part B of Figure 1 and is labelled ‘Lost Health Outcomes’. Third, are the ‘*costs of all outpatient visits*’. The information used is summarised in Part C of Figure 1 and is labelled ‘Outpatient Clinics Costs’. Fourth, are the ‘*costs of all poly clinic, use of community health assist scheme (CHAS) and emergency departments (ED) visits*’. The information used is summarised in Part D of Figure 1 and is labelled ‘Primary Care and ED costs’. CHAS is a mechanism for funding all Singapore Citizens to attend medical and or dental care at participating General Practitioner (GP) and dental clinics. CHAS is particularly designed to support the management of chronic diseases.

### Data, Parameters and Assumptions

#### A. Inpatient Acute Sector Costs

Two outcomes, shown by blue boxes in Figure 1, are estimated: ‘*Number of bed days lost per case*’ and ‘*Value of all hospital bed days lost for population (\$)*’. To estimate the ‘*Number of bed days lost per case*’ we combined information on the ‘*Number of admissions to hospital with wounds*’ with information on ‘*Excess acute hospital stay due to a wound*’. To estimate the ‘*Number of admissions to hospital with wounds*’ we retrieved a population cohort of all inpatient admissions to acute hospitals in Singapore between 2012 and 2019 from the Singapore Ministry of Health, and applied the cases from 2017. From the entire

dataset we identified all inpatient episodes with any occurrence of Venous ulcers, Arterial insufficiency ulcers, Diabetic ulcers and Pressure injury or any combination of these wounds as a primary or secondary diagnosis based on the ICD-9 codes in Appendix 1.

To estimate '*Excess acute hospital stay due to wound*' we extracted the length of hospital stay and relevant co-variate information that could be used to explain variation in the length of stay, see Appendix 2. A parsimonious multivariable generalised linear model (GLM) with a gamma link function was used to accommodate the skew typical of lengths of stay data [19]. The outcome of interest was the length of stay associated with chronic wound management in the inpatient setting. Other covariates included were age, gender, race, and comorbid chronic diseases. The statistical model generated a coefficient for 'wound type' expressed as a rate ratio, that showed the amount of increase in length of stay associated with the presence of wound, given that other factors that predicted length of stay had been accounted for. This rate ratio was used to moderate the mean length of stay for the entire sample and an excess length of stay associated with the wound was estimated. In Appendix 3 we show a summary of the results of the multivariable generalised linear model and in Appendix 4 we show the full model results.

To estimate the '*Value of all hospital bed days lost for population (\$)*' we combined the '*Number of bed days lost per case*' with the '*Cost per bed day (\$)*'.

All the data inputs used for this part of the model are shown in Table 1.

**Table 1. Data inputs used to estimate the outcomes for the 'Inpatient Acute Sector Costs'**

| Parameter                                      | Estimate | Distribution used for uncertainty |                                                     |
|------------------------------------------------|----------|-----------------------------------|-----------------------------------------------------|
| Excess acute hospital stay due to wound (days) |          |                                   |                                                     |
| Arterial                                       | 2.37     | Gamma (757, 0.0031)               | Estimated by multivariable generalised linear model |
| Venous                                         | 0.79     | Gamma (84, 0.0094)                |                                                     |
| Diabetic                                       | 2.26     | Gamma (742, 0.003)                |                                                     |
| Pressure                                       | 1.61     | Gamma (724, 0.0022)               |                                                     |
| Number of admissions to hospital with wounds   |          |                                   |                                                     |
| Arterial                                       | 14,536   | Fixed                             | #                                                   |
| Venous                                         | 19,210   | Fixed                             |                                                     |
| Diabetic                                       | 16,999   | Fixed                             |                                                     |
| Pressure                                       | 49,879   | Fixed                             |                                                     |
| Cost per bed day (\$)                          | 823      | Normal(823, 2.78)                 | #                                                   |

# Ministry of Health, *Administrative database*, Ministry of Health (MOH). Accessed in 2021.

## B. Lost Health Outcomes

Five outcomes, shown by blue boxes in Figure 1, are estimated: *Annual cases by wound type*; *Number of QALYs lost per case (by age group)*; *Utility decrement*; *Number of QALYS lost in population*; and, *Monetary value of QALYS lost in the population (\$)*. The first four are intermediate outcomes that contribute information to the primary outcome of '*Monetary value of QALYS lost in the population (\$)*'.

1 To estimate '*Annual cases by wound type*' we apply the incidence rates for each wound type to the '*Total at*  
2 *risk population*'. We used published incidence rates for 2017 from a population-based study of wounds  
3 among those admitted to Singapore acute care hospitals from 2000 to 2017 [20]. For this work the authors  
4 identified relevant ICD-10 codes for occurrences of venous ulcers, arterial insufficiency ulcers, diabetic  
5 ulcers, and pressure ulcers or injuries, see Appendix 1, and applied them to the Singapore Ministry of Health  
6 central claims database, which includes records of all admissions to public and private acute care hospitals.  
7 The incidence rates by age band are reported alongside the at-risk population enabling the number of  
8 incident cases to be estimated, see Appendix 5 for more detail.  
9  
10  
11  
12  
13  
14

15 To estimate the '*Number of QALYs lost per case (by age group)*' we use EQ-5D-5L data. This instrument  
16 includes preference based valuations of health states expressed as 'health utilities' on a scale between zero,  
17 the worst possible health state, and one, the best possible health state [21]. We used EQ-5D-5L data from  
18 799 individuals with relevant wounds from the Singapore wound care registry to inform the '*Health utility*  
19 *for cases with specific wound type*'. Responses were recorded at entry into the registry, when the wound was  
20 first assessed in the hospital setting and then at 1, 3 and 6 months, see Appendix 6. We used a Singapore  
21 EQ-5D-3L value set [22] that was then mapped onto the EQ-5D-5L version using the SAS code in Appendix  
22 7. The utility outcomes for the wound patients are compared to population norms for the EQ-5D index  
23 informed by Singapore preference weights for appropriate age bands [23], this informs the '*Population*  
24 *normal Utility (by age)*'. Using the information described above we are able to estimate the '*Utility*  
25 *Decrement*' from having a wound. The '*Duration of Wound*' was informed by the mean durations of wounds  
26 in days for the specific wound types from the Singapore Wound Registry, see Appendix 8. The '*Number of*  
27 *QALYs lost in population*' is the product of the '*Number of QALYs lost per case*' and the '*Annual cases by*  
28 *wound type*'. The '*Monetary value of QALYs lost in the population*' is the product of the '*Number of QALYs*  
29 *lost in population*' and the '*Value of one QALY*', which is set at the mean gross domestic product per capita  
30 for Singapore of SGD \$80,000 [24]. This approach assumes the value of one year of perfect quality of life  
31 does not exceed the per capita gross domestic product [25].  
32  
33  
34  
35  
36  
37  
38  
39  
40  
41  
42  
43  
44  
45

46 All the data inputs used for this part of the model are shown in Table 2.  
47  
48  
49  
50  
51  
52  
53  
54  
55  
56  
57  
58  
59  
60

**Table 2. Data inputs used to estimate the outcomes for the ‘Lost Health Outcomes’**

| Parameter                                                  | Estimate | Distribution used for uncertainty |                          |  |
|------------------------------------------------------------|----------|-----------------------------------|--------------------------|--|
| <i>Health utility for cases with specific wound type</i>   |          |                                   |                          |  |
| Arterial – baseline                                        | 0.44     | Beta (0.24, 0.30)                 | Singapore Wound Registry |  |
| Venous – baseline                                          | 0.57     | Beta (0.60, 0.46)                 |                          |  |
| Diabetic – baseline                                        | 0.64     | Beta (0.21, 0.12)                 |                          |  |
| Pressure – baseline                                        | -0.18    | Normal (-0.18, 0.50)              |                          |  |
| Arterial – month 1                                         | 0.52     | Beta (0.23, 0.21)                 |                          |  |
| Venous – month 1                                           | 0.68     | Beta (0.89, 0.41)                 |                          |  |
| Diabetic – month 1                                         | 0.71     | Beta (0.04, 0.02)                 |                          |  |
| Pressure – month 1                                         | 0.00     | Normal (0.00, 0.56)               |                          |  |
| Arterial – month 3                                         | 0.54     | Beta (0.13, 0.11)                 |                          |  |
| Venous – month 3                                           | 0.74     | Beta (0.81, 0.28)                 |                          |  |
| Diabetic – month 3                                         | 0.72     | Beta (0.28, 0.11)                 |                          |  |
| Pressure – month 3                                         | 0.18     | Normal (0.18, 0.54)               |                          |  |
| Arterial – month 6                                         | 0.58     | Beta (0.16, 0.12)                 |                          |  |
| Venous – month 6                                           | 0.74     | Beta (0.83, 0.28)                 |                          |  |
| Diabetic – month 6                                         | 0.74     | Beta (0.05, 0.02)                 |                          |  |
| Pressure – month 6                                         | 0.11     | Normal (0.11, 0.59)               |                          |  |
| <i>Population normal utility (by age group)</i>            |          |                                   |                          |  |
| <40                                                        | 0.980    | Beta (350, 7)                     | [23]                     |  |
| 40-49                                                      | 0.950    | Beta (636, 33)                    |                          |  |
| 50-59                                                      | 0.940    | Beta (535, 34)                    |                          |  |
| 60-69                                                      | 0.960    | Beta (193, 8)                     |                          |  |
| 70-79                                                      | 0.890    | Beta (189, 23)                    |                          |  |
| ≥80                                                        | 0.890    | Beta (189, 23)                    |                          |  |
| <i>Value of one QALY (\$)</i>                              | 80,000   | Fixed                             | [24]                     |  |
| <i>Durations of Arterial wounds in days (by age group)</i> |          |                                   |                          |  |
| <40                                                        | 133      | Normal(133,92)                    | Singapore Wound Registry |  |
| 40-49                                                      | 129      | Normal(129,109)                   |                          |  |
| 50-59                                                      | 331      | Normal(331,394)                   |                          |  |
| 60-69                                                      | 223      | Normal(223,269)                   |                          |  |
| 70-79                                                      | 307      | Normal(307,438)                   |                          |  |
| ≥80                                                        | 205      | Normal(205,153)                   |                          |  |
| <i>Durations of Venous wounds in days (by age group)</i>   |          |                                   |                          |  |
| <40                                                        | 133      | Normal(133,92)                    |                          |  |
| 40-49                                                      | 129      | Normal(129,109)                   |                          |  |
| 50-59                                                      | 331      | Normal(331,394)                   |                          |  |
| 60-69                                                      | 223      | Normal(223,269)                   |                          |  |
| 70-79                                                      | 307      | Normal(307,438)                   |                          |  |
| ≥80                                                        | 205      | Normal(205,153)                   |                          |  |
| <i>Durations of Diabetic wounds in days (by age group)</i> |          |                                   |                          |  |
| <40                                                        | 177      | Normal(177,88)                    |                          |  |
| 40-49                                                      | 325      | Normal(325,550)                   |                          |  |
| 50-59                                                      | 224      | Normal(224,216)                   |                          |  |
| 60-69                                                      | 314      | Normal(314,430)                   |                          |  |
| 70-79                                                      | 256      | Normal(256,305)                   |                          |  |
| ≥80                                                        | 160      | Normal(160,138)                   |                          |  |
| <i>Durations of Pressure injury in days (by age group)</i> |          |                                   |                          |  |
| <40                                                        | 55       | Normal(55,11)                     |                          |  |
| 40-49                                                      | 86       | Normal(86,24)                     |                          |  |
| 50-59                                                      | 115      | Normal(115,1)                     |                          |  |
| 60-69                                                      | 103      | Normal(103,59)                    |                          |  |
| 70-79                                                      | 105      | Normal(105,115)                   |                          |  |
| ≥80                                                        | 62       | Normal(62,52)                     |                          |  |

**C. Outpatient Clinics costs**

Only one outcome, ‘Costs of all outpatient visit (\$)’, was estimated. Information was used for the ‘Annual cases by wound type’, ‘Cost per outpatient visit (\$)’ and ‘Outpatient visits per case’



To estimate 'Cost per outpatient visit (\$)' we interrogated the Singapore wound care registry to identify the annual number of visits for those with chronic wounds and the reported costs per visits, this information was available by wound type. There were 573 individuals for whom these data were reported. Visits were for specialist consultations specifically for their wound, and for podiatry visit or medical tests, see Appendix 9. All the data inputs used for this part of the model are shown in Table 3.

**Table 3. Data inputs used to estimate the outcomes for the 'Outpatient Clinic Costs'**

|                                                  | Estimate | Distribution used for uncertainty | Source                   |
|--------------------------------------------------|----------|-----------------------------------|--------------------------|
| Outpatient visits per case (with consult)        |          |                                   | Singapore Wound Registry |
| Arterial                                         | 8.2      | Gamma (1.82:4.52)                 |                          |
| Venous                                           | 5.9      | Gamma (0.98:5.99)                 |                          |
| Diabetic                                         | 8.1      | Gamma (1.70:4.76)                 |                          |
| Pressure                                         | 6.5      | Gamma (1.93:3.37)                 |                          |
| Outpatient visits per case (without consult)     |          |                                   |                          |
| Arterial                                         | 8.5      | Gamma (1.77:4.79)                 |                          |
| Venous                                           | 23.6     | Gamma (1.55:15.25)                |                          |
| Diabetic                                         | 14.2     | Gamma (0.08:185.15)               |                          |
| Pressure                                         | 9.7      | Gamma (0.81:12.00)                |                          |
| Cost per outpatient visit (with consult) (\$)    |          |                                   |                          |
| Arterial                                         | 110      | Gamma (5.60:19.74)                |                          |
| Venous                                           | 133      | Gamma (2.70:49.30)                |                          |
| Diabetic                                         | 112      | Gamma (2.86:39.20)                |                          |
| Pressure                                         | 111      | Gamma (4.05:27.43)                |                          |
| Cost per outpatient visit (without consult) (\$) |          |                                   |                          |
| Arterial                                         | 117      | Gamma (5.60:19.74)                |                          |
| Venous                                           | 106      | Gamma (2.70:49.30)                |                          |
| Diabetic                                         | 114      | Gamma (2.86:39.20)                |                          |
| Pressure                                         | 124      | Gamma (4.05:27.43)                |                          |

#### D. Primary Care and ED costs

Only one outcome 'Costs of all POLY, CHAS & ED visits (\$)' was estimated. Information was used for the 'Annual cases by wound type', 'Cost per POLY, CHAS & ED visit (\$)' and 'Excess POLY, CHAS & ED visits per case due to wound'.

For the 'Cost per POLY, CHAS & ED visit (\$)' we use estimates reported by the Singapore Ministry of Health. To estimate 'Excess POLY, CHAS & ED visits per case due to wound' the same population cohort for 2012 to 2019 who were admitted as inpatients were interrogated. We identify the use of the Emergency Departments (ED) of acute hospitals and all visits to community-based Polyclinics (POLY) and use of community health assist scheme (CHAS).

We sought to estimate the excess use of these services associated with any chronic wound. For the analysis each patient is counted only once, and those with wounds are only counted when they first appear with any wound, and the number of 12-month visits from the incidence date is the outcome variable. For those without wounds, their 12-month use starts from the first visit during the study period. A parsimonious generalised linear model with a log link Poisson function was used for all regressions. The Poisson distribution was chosen over the negative binomial distribution based on fitting the model then doing model

checks with diagnostic plots and relevant statistics. The outcome of interest was a count of the use of the services. Other covariates included were age, gender, race, Charlson comorbidity index and presence of comorbid conditions, see Appendix 10. The ensuing statistical models generated a coefficient for ‘any wound’ expressed as a rate ratio, that showed the change in the number of visits associated with the presence of wound, given that other factors that predicted variation in these outcomes. As before, the rate ratio was used to moderate the mean counts for the entire sample and an excess number of visits was estimated for all wounds, see Appendix 11. All the data inputs used for this part of the model are shown in Table 4.

**Table 4. Data inputs used to estimate the outcomes for the ‘Primary care and ED Costs’**

| Parameter                                  | Estimate | Distribution used for uncertainty | Source                                                                                  |
|--------------------------------------------|----------|-----------------------------------|-----------------------------------------------------------------------------------------|
| Excess visits for Polyclinics (all wounds) | 0.91     | Gamma (18.33, 0.049)              | Estimated by multivariable generalised linear model                                     |
| Excess visits for CHAS (all wounds)        | 3.54     | Gamma (38.51, 0.091)              |                                                                                         |
| Excess visits for ED (all wounds)          | 0.63     | Gamma (4.18, 0.15)                |                                                                                         |
| Cost per Poly clinic visit                 | \$147    | Normal(147,2.5)                   | Ministry of Health, Administrative database, Ministry of Health (MOH). Accessed in 2021 |
| Cost per CHAS use                          | \$56     | Normal(56,1.14)                   |                                                                                         |
| Cost per ED visit                          | \$352    | Normal(352,.14)                   |                                                                                         |

## Uncertainty & Model Evaluation

Uncertainty for all the outcomes shown in Figure 1 was assessed by probabilistic sensitivity analysis. We take 5,000 Monte Carlo resamples from all the parameters described in Tables 1 to 4. We report the number of ‘acute care bed days lost’ and the number of ‘QALYs lost to chronic wounds’. We then report the findings from the resamples for the primary model outcomes: *Value of all bed days lost for population; Monetary value of QALYS lost in the population; Costs of all outpatient visit; and, Costs of all POLY, CHAS & ED visits.* We sum these four primary outcomes to report the ‘*Total Costs of Illness for each wound type*’. These processes are shown in Figure 1.

## Patient and Public Involvement

The data came from the Singapore Wound Registry and from the Ministry of Health. It was routinely reported data collected for the purpose of managing and planning health services. It was not possible to develop the research question or outcome measures based on the priorities, experience, and preferences of the patients. Patients were not involved patients in the design, recruitment and conduct of the study. Patients who are interested will be able to read the paper.

## Results

There were 16,752 ‘new’ or ‘incident’ cases for 2017, with 598 venous ulcers, 2,206 arterial insufficiency ulcers, 6,680 diabetic ulcers and 7,268 pressure injuries. The values obtained from the model for ‘acute care bed days lost’ and the number of ‘QALYs lost to chronic wounds’ are shown in Table 5.

**Table 5. Annual outcomes for bed days lost and QALYs lost for incident cases (n=16,752)**

| Number of QALYS lost    | mean (min:max)         |
|-------------------------|------------------------|
| Arterial                | 544 (-340:5,436)       |
| Venous                  | 75 (-127:0,971)        |
| Diabetic                | 856 (-1670:16,962)     |
| Pressure                | 602 (-520:6,631)       |
| Number of Bed days lost |                        |
| Arterial                | 34,389 (29269:38,674)  |
| Venous                  | 15,161 (10,044:22,166) |
| Diabetic                | 38,423 (33,445:43,573) |
| Pressure                | 80,530 (69,208:91,619) |

The values obtained from the model for the four primary outcomes are shown in Table 6.

**Table 6. Annual cost outcomes for the primary outcomes (n=16,752)**

| Value of all bed days lost for population      | mean (min:max)                                |
|------------------------------------------------|-----------------------------------------------|
| Arterial                                       | \$28,302,139 (\$24,148,856:\$31,912,933)      |
| Venous                                         | \$12,477,776 (\$8,243,954:\$18,212,629)       |
| Diabetic                                       | \$31,622,397 (\$27,431,880:\$35,693,113)      |
| Pressure                                       | \$66,276,250 (\$57,237,092:\$75,718,807)      |
| Monetary value of QALYS lost in the population |                                               |
| Arterial                                       | \$43,491,588 (-\$27,170,499:\$434,890,646)    |
| Venous                                         | \$5,975,553 (-\$10,153,391:\$77,645,170)      |
| Diabetic                                       | \$68,498,429 (-\$133,624,494:\$1,356,989,736) |
| Pressure                                       | \$48,199,291 (-\$41,617,890:\$530,453,557)    |
| Costs of all outpatient visit                  |                                               |
| Arterial                                       | \$4,233,236 (\$84,899:\$35,360,192)           |
| Venous                                         | \$2,017,189 (\$8,957:\$27,539,296)            |
| Diabetic                                       | \$16,337,217 (\$3,058:\$785,613,392)          |
| Pressure                                       | \$13,859,689 (\$42,824:\$142,991,574)         |
| Primary care & ED costs                        |                                               |
| Costs Polyclinic visits - all wounds           | \$2,245,437 (\$877,197:\$5,715,449)           |
| Costs CHAS episodes of care - all wounds       | \$3,296,040 (\$1,849,062:\$5,930,304)         |
| Costs ED visits - all wounds                   | \$3,730,682 (\$235,741:\$14,456,940)          |

The aggregate of these cost outcomes are the 'Total Costs of Illness for each wound type' and are shown in Table 7.

**Table 7. Annual total costs of illness for each wound type (n=16,752)**

| Total Costs of Illness for each wound type | mean (min:max)                                |
|--------------------------------------------|-----------------------------------------------|
| Arterial                                   | \$77,247,993 (\$6,047,354:\$469,696,045)      |
| Venous                                     | \$20,801,577 (\$5,388,353:\$91,673,830)       |
| Diabetic                                   | \$120,155,304 (-\$97,359,748:\$1,395,843,120) |
| Pressure                                   | \$132,358,039 (\$42,035,656:\$624,864,715)    |
| Total Cost of Illness                      | \$350,562,913 (\$72,814,108:\$1,779,366,924)  |

Based on our estimates pressure injuries account for 48% of the 168,503 bed days lost to chronic wounds and 38% of the \$28.4M outpatients costs. For the non-hospital sector, the costs of CHAS services and ED visits account for most of the burden. The QALY burdens are large for diabetic foot, arterial and pressure injury with venous ulcers having lesser impact. Box plots for the 'Total Costs' outcomes are shown in Figure 2.

FIGURE 2 HERE

There is a 100% probability that the costs of chronic wounds are positive with the most likely value suggesting an annual cost to Singapore of \$350 million. The findings are uncertain with the range of total costs between \$79 million and \$1.78 billion. More than half of the total costs arise from use of health services (\$185 million, 53%) with outpatients accounting for \$37 million (10%) and the use of acute bed days accounting for \$139 million (40%). The value of the lost health by QALYs is substantial at \$165 million, 47% of the total burden.

## Discussion

These findings suggest the costs of chronic wounds to Singapore are large. The total cost burden accounts for 3.14% of the 2019 Government Health Expenditure on services [26] and 2.3% of total economy-wide expenditure on services. Our estimates roughly align with those from other countries. In Australia 2% of the total national health expenditure is used for chronic wounds and in the UK 3% of the national health expenditure is taken up [27]. Two percent of the European health budget [28] is for care of chronic wounds and for Scandinavian countries the costs were found to be 2 to 4% of the total health care expenditure [6].

While the findings are lower than the annual costs of diabetes in Singapore, estimated to be US \$787 million in 2010 [29], the policy response to diabetes has been considerable with a 'War on Diabetes' declared in 2016 to mobilise a national programme to reduce the problem of diabetes [30]. We found two other studies reporting costs of chronic venous leg and neuro-ischemic ulcers in Singapore, but neither study were at a population level instead focusing on average costs per patient [31, 32].

1 This study likely underestimates the extent of the costs of chronic wounds as relevant information was not  
2 available for many costs we suspect are present. Our data came primarily from patients who were admitted  
3 to the hospital for their wounds. Thus patients with less serious wounds managed in the community are  
4 excluded. We were also unable to identify and include estimates of the private costs incurred by patients and  
5 family members. Other studies have found that such costs can be substantial. For the German setting  
6 Purwins et al. [33] found patients with leg ulcers in a given year spent €424 on topical treatments and drugs,  
7 €486 on out of pocket incidentals, €254 on drug prescriptions and €740 on non-drug treatments.  
8  
9

10  
11  
12  
13  
14 Although no data were available on the time away from work and other production losses, we addressed this  
15 by estimating and valuing lost quality adjusted life years (QALYs). We assume that time in reduced health  
16 states has a relationship with an ability to be economically productive. Thus, the dollar valuations of the lost  
17 QALYs can be thought of as representing lost production from chronic wounds. Most governments are  
18 willing to pay money for services that increase the number of QALYs in a population, given a programme  
19 achieves a marginal QALY below a designated cost [34]. Importantly we did not consider the costs of lost  
20 production for informal carers, which we expect are substantial.  
21  
22  
23  
24  
25

26  
27 There are further limitations to our study. Regarding the estimation of QALY losses, the sample sizes for  
28 EQ5D were quite small for Pressure injury with only 51 patients providing data. It is possible the estimate  
29 would change with a larger and more representative sample. It should be noted that the lowest health utilities  
30 arise from this sample. For example, the values for baseline were -0.18 indicating a health state valued  
31 worse than death, and a value of 0.00, the worst possible health state, was observed for month 1. Values  
32 remained low at 0.18 and 0.11 for the 3 month and 6 month follow-ups. We assumed that the observed  
33 decrement between the population norms for health utility and the estimates from the wound registry were  
34 wholly attributable to the presence of a wound. These QALY estimates did not adjust for the other health  
35 conditions that patients may have, and as such may overstate the QALY losses.  
36  
37  
38  
39  
40  
41  
42  
43

44 To attribute excess acute bed days to the presence of a chronic wound we developed generalised linear  
45 regression models with the outcome of length of stay. While did not have an exhaustive list of control  
46 variables we did find that factors such as race, age, gender, myocardial infarction, cancer, liver disease,  
47 peptic ulcer disease, peripheral vascular disease, renal disease, COPD, dementia, diabetes, heart failure,  
48 hyperlipidemia, lymphoproliferative disease, major depression, Parkinson's, schizophrenia and stroke all  
49 played a role in explaining variation in the observed length of stay. We fitted the best models possible, but  
50 acknowledge there may be some covariate information missing.  
51  
52  
53  
54  
55  
56

57 In summary, this recurring and unnecessary cost burden is a deadweight loss to Singapore health services,  
58 and society in general. It could be reduced if evidence-based and relatively simple prevention and  
59 management programmes were implemented. International evidence [9] reveals that using optimal  
60 prevention practices for diabetic foot ulcers [35] was cost-saving in Peru [36], Australia [37], Thailand [38]

1 and China [39]. For the prevention of pressure injury nursing led interventions, a quality improvement  
2 collaborative and the standardised use of pressure injury bundles were found to be cost-saving in Denmark  
3 [40], the US and UK [41-44]. And for the prevention of venous leg ulcers, compression therapy, clinical  
4 assessments and use of guidelines were found to be cost-saving in the UK [45, 46] and US [47, 48].  
5  
6  
7

8  
9 Our findings provide fundamental information for researchers who wish to model the cost-effectiveness of  
10 programmes that will improve wound outcomes in the future. Understanding the baseline of costs and  
11 QALY outcomes form a useful start-point for any evaluation of interventions.  
12  
13  
14

## 15 **Conclusions.**

16  
17  
18 The costs of chronic wounds are large to Singapore, but many of them could be avoided by making positive  
19 investments in integrated and comprehensive wound prevention and treatment programmes.  
20  
21  
22

## 23 **Authors contributions.**

24  
25 Nicholas Graves, Ganga Ganesan, Kelvin Tan, Orlanda Qi Mei Goh, Jackie Ho, Chong Tze Tec, Priya  
26 Bishnoi, David Carmody, Ang Shin Yuh, Ng Yi Zhen, Zhiwen Lo, Yong Enming, Fazila Binte, Abu Bakar  
27 Aloweni, Wang Zifei and Keith Harding made substantial contributions to the: conception and design of the  
28 paper, the acquisition, analysis, and interpretation of data; drafting and reviewing versions of the  
29 manuscript; and, final approval of the version submitted. All authors are accountable for all aspects of the  
30 work.  
31  
32  
33  
34  
35  
36

37 **A competing interests statement.** None  
38  
39

40 **Funding.** We would like to acknowledge the funding supported from the Agency for Science, Technology  
41 and Research (A\*STAR) under its Industry Alignment Fund-Pre-Positioning Programme (IAF-PP) grant  
42 number H1901a00Y9/ and H17/01/a0/0CC9 as part of the Wound Care Innovation for the Tropics (WCIT)  
43 Programme.  
44  
45  
46  
47

48 **Data availability statement.** No data from the wound registry or MoH administrative databases are  
49 available. This is due to the privacy considerations of the Singapore MOH and the Singapore wound  
50 registry.  
51  
52  
53

## 54 **Ethics Approval**

55  
56  
57 This research study has been approved by the NHG Domain Specific Review Board (DSRB 2019/00917).  
58  
59  
60

## References

1. Raeder, K., et al., *Prevalence and risk factors of chronic wounds in nursing homes in Germany: A Cross-Sectional Study*. *Int Wound J*, 2020. **17**(5): p. 1128-1134.
2. Graves, N., C.J. Phillips, and K. Harding, *A narrative review of the epidemiology and economics of chronic wounds*. *British Journal of Dermatology*. **n/a**(n/a).
3. Dávila Torres, J., [To err is human, but to not put processes in place to avoid errors from becoming fatal is inhumane. *5th International Summit of the Patient Safety Movement (PSM), California, USA, 2017*]. *Cir Cir*, 2017. **85**(2): p. 101-103.
4. Olsson, M., et al., *The humanistic and economic burden of chronic wounds: A systematic review*. *Wound Repair Regen*, 2019. **27**(1): p. 114-125.
5. Posnett, J. and P.J. Franks, *The burden of chronic wounds in the UK*. *Nurs Times*, 2008. **104**(3): p. 44-5.
6. Gottrup, F., et al., *A new concept of a multidisciplinary wound healing center and a national expert function of wound healing*. *Archives Of Surgery (Chicago, Ill.: 1960)*, 2001. **136**(7): p. 765-772.
7. Pacella, R.E., et al., *Reimbursement for the cost of compression therapy for the management of venous leg ulcers in Australia*. *Int Wound J*, 2019. **16**(4): p. 1069-1072.
8. Gyawali, B., R. Sullivan, and C.M. Booth, *Cancer groundshot: going global before going to the moon*. *Lancet Oncol*, 2018. **19**(3): p. 288-290.
9. Cheng, Q., N. Graves, and R.E. Pacella, *Economic Evaluations of Guideline-Based Care for Chronic Wounds: a Systematic Review*. *Appl Health Econ Health Policy*, 2018. **16**(5): p. 633-651.
10. Lo, Z.J., et al., *Clinical and economic burden of wound care in the tropics: a 5-year institutional population health review*. *Int Wound J*, 2020. **17**(3): p. 790-803.
11. Fitridge, R., G. Pena, and J.L. Mills, *The patient presenting with chronic limb-threatening ischaemia. Does diabetes influence presentation, limb outcomes and survival?* *Diabetes Metab Res Rev*, 2020. **36** **Suppl 1**: p. e3242.
12. Sorber, R. and C.J. Abularrage, *Diabetic foot ulcers: Epidemiology and the role of multidisciplinary care teams*. *Semin Vasc Surg*, 2021. **34**(1): p. 47-53.
13. Martinengo, L., et al., *Prevalence of chronic wounds in the general population: systematic review and meta-analysis of observational studies*. *Ann Epidemiol*, 2019. **29**: p. 8-15.
14. Kapp, S. and N. Santamaria, *The financial and quality-of-life cost to patients living with a chronic wound in the community*. *Int Wound J*, 2017. **14**(6): p. 1108-1119.
15. McCabe, C., K. Claxton, and A.J. Culyer, *The NICE cost-effectiveness threshold: what it is and what that means*. *Pharmacoeconomics*, 2008. **26**(9): p. 733-44.
16. Jo, C., *Cost-of-illness studies: concepts, scopes, and methods*. *Clin Mol Hepatol*, 2014. **20**(4): p. 327-37.
17. Ministry of Health *Population in Brief*. Available at <https://www.population.gov.sg/images/PublicationImages/population-in-brief-2017.pdf>. 2022.
18. Department of Statistics, M.o.T.I., Republic of Singapore,, *Census of Population 2020 Statistical Release 1: Demographic Characteristics, Education, Language and Religion*. Available here <https://www.singstat.gov.sg/-/media/files/publications/cop2020/sr1/cop2020sr1.ashx>. 2020.
19. Dodd, S., et al., *A comparison of multivariable regression models to analyse cost data*. *J Eval Clin Pract*, 2006. **12**(1): p. 76-86.
20. Goh, O.Q., et al., *Incidence of chronic wounds in Singapore, a multiethnic Asian country, between 2000 and 2017: a retrospective cohort study using a nationwide claims database*. *BMJ Open*, 2020. **10**(9): p. e039411.
21. Devlin N, P.D., Janssen B., *Methods for Analysing and Reporting EQ-5D Data*. Available here <https://link.springer.com/content/pdf/10.1007%2F978-3-030-47622-9.pdf>. 2020: Springer.
22. Luo, N., et al., *Valuation of EQ-5D-3L health states in Singapore: modeling of time trade-off values for 80 empirically observed health states*. *Pharmacoeconomics*, 2014. **32**(5): p. 495-507.
23. Abdin, E., et al., *Population norms for the EQ-5D index scores using Singapore preference weights*. *Qual Life Res*, 2015. **24**(6): p. 1545-53.
24. World Bank *GDP per capita (current US\$) - Singapore*, available at <https://data.worldbank.org/indicator/NY.GDP.PCAP.CD?locations=SG>. Accessed June 2021. 2018.
25. Williams A, *What Could be Nicer than NICE? OHE Annual Lecture*. Available here [file:///C:/Users/gmsgnic/Downloads/292%20-%202004\\_What\\_Could\\_Be\\_Nicer\\_Williams.pdf](file:///C:/Users/gmsgnic/Downloads/292%20-%202004_What_Could_Be_Nicer_Williams.pdf), ed. O.o.H. Economics. 2004, London.

26. Ministry of Health Singapore, *GOVERNMENT HEALTH EXPENDITURE AND HEALTHCARE FINANCING*. Available here <https://www.moh.gov.sg/resources-statistics/singapore-health-facts/government-health-expenditure-and-healthcare-financing>. 2022.
27. Posnett, J. and P.J. Franks, *The costs of skin breakdown and ulceration in the UK*, in *Skin Breakdown: The Silent Epidemic*, M. Pownett, Editor. 2007, Hull: Smith & Nephew Foundation.
28. Böttrich, J.G. *Challenges in chronic wound care: the need for interdisciplinary collaboration* [cited 2013 Mach 2]; Available from: <http://www.eucomed.be/blog/108/59/blog/2012/02/23/Challenges-in-chronic-wound-care-the-need-for-interdisciplinary-collaboration>.
29. Png, M.E., et al., *Current and future economic burden of diabetes among working-age adults in Asia: conservative estimates for Singapore from 2010-2050*. BMC Public Health, 2016. **16**: p. 153.
30. Ministry of Health, *WAR ON DIABETES*. Available here <https://www.moh.gov.sg/wodcj>. 2022.
31. Nazeha, N., et al., *The burden of costs on health services from patients with venous leg ulcers in Singapore*. Int Wound J, 2022.
32. Nazeha, N., et al., *The burden of costs on health services by patients with neuro-ischaemic ulcers in Singapore*. Int Wound J, 2022.
33. Purwins, S., et al., *Cost-of-illness of chronic leg ulcers in Germany*. Int Wound J, 2010. **7**(2): p. 97-102.
34. Rawlins, M.D. and A.J. Culyer, *National Institute for Clinical Excellence and its value judgments*. Bmj, 2004. **329**(7459): p. 224-7.
35. Foot., I.W.G.o.t.D., *International consensus on the diabetic foot*. Amsterdam: International Working Group on the Diabetic Foot. 1999.
36. Cárdenas, M.K., et al., *The cost of illness attributable to diabetic foot and cost-effectiveness of secondary prevention in Peru*. BMC Health Services Research, 2015. **15**(1): p. 483.
37. Cheng, Q., et al., *A cost-effectiveness analysis of optimal care for diabetic foot ulcers in Australia*. Int Wound J, 2017. **14**(4): p. 616-628.
38. Rerkasem, K., et al., *A multidisciplinary diabetic foot protocol at Chiang Mai University Hospital: cost and quality of life*. Int J Low Extrem Wounds, 2009. **8**(3): p. 153-6.
39. Wu, B., X. Wan, and J. Ma, *Cost-effectiveness of prevention and management of diabetic foot ulcer and amputation in a health resource-limited setting*. J Diabetes, 2018. **10**(4): p. 320-327.
40. Mathiesen, A.S.M., et al., *Are labour-intensive efforts to prevent pressure ulcers cost-effective?* Journal of Medical Economics, 2013. **16**(10): p. 1238-1245.
41. Padula, W.V., et al., *Improving the quality of pressure ulcer care with prevention: a cost-effectiveness analysis*. Med Care, 2011. **49**(4): p. 385-92.
42. Thomson, J.S. and R.G. Brooks, *The economics of preventing and treating pressure ulcers: a pilot study*. J Wound Care, 1999. **8**(6): p. 312-6.
43. Xakellis, G.C. and R.A. Frantz, *The Cost-Effectiveness of Interventions for Preventing Pressure Ulcers*. The Journal of the American Board of Family Practice, 1996. **9**(2): p. 79-85.
44. Xakellis, G.C., Jr., et al., *Cost-effectiveness of an intensive pressure ulcer prevention protocol in long-term care*. Adv Wound Care, 1998. **11**(1): p. 22-9.
45. Bosanquet, N., et al., *Community leg ulcer clinics: cost-effectiveness*. Health Trends, 1993. **25**(4): p. 146-8.
46. Simon, D.A., et al., *Community leg ulcer clinics: a comparative study in two health authorities*. Bmj, 1996. **312**(7047): p. 1648-51.
47. Korn, P., et al., *Why insurers should reimburse for compression stockings in patients with chronic venous stasis*. J Vasc Surg, 2002. **35**(5): p. 950-7.
48. McGuckin, M., et al., *Validation of venous leg ulcer guidelines in the United States and United Kingdom*. Am J Surg, 2002. **183**(2): p. 132-7.

**Figure 1. A diagram to show how the various parameters update the outcomes**

**Figure 2. Total cost outcomes for the cost of Illness by wound type**



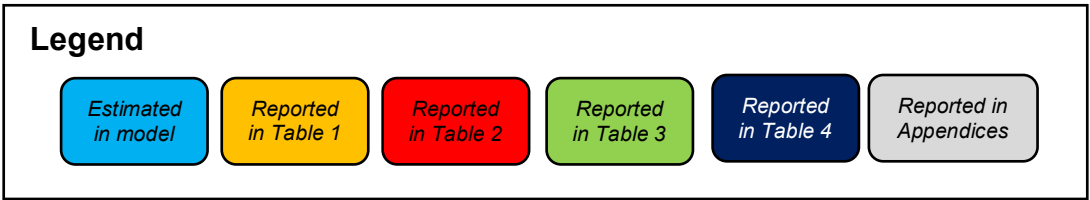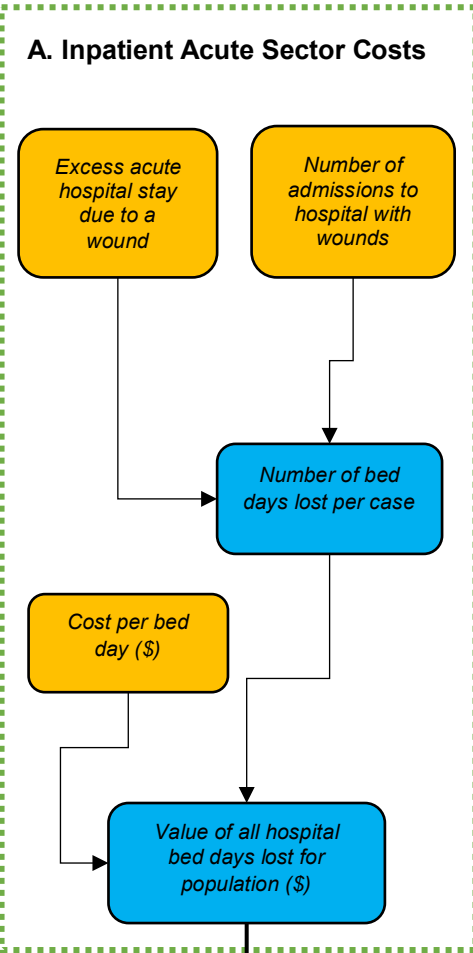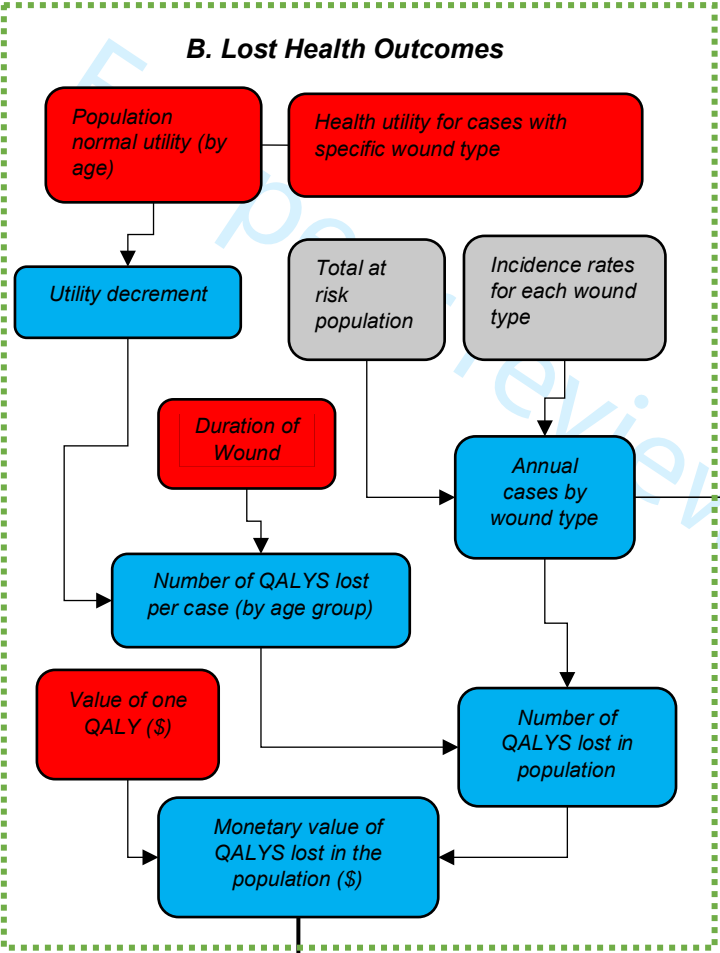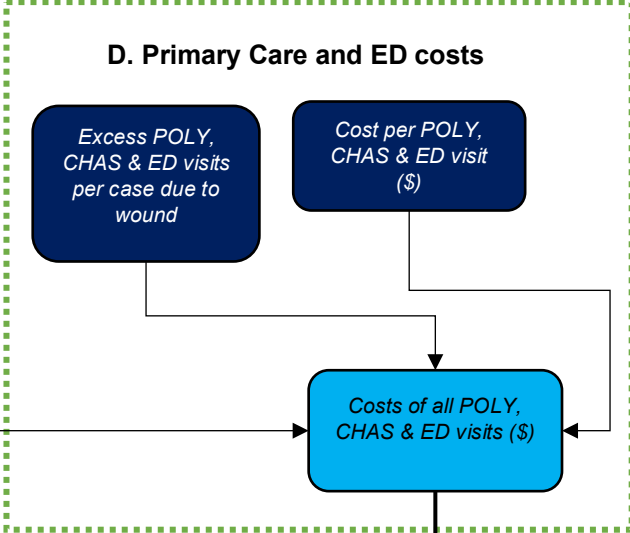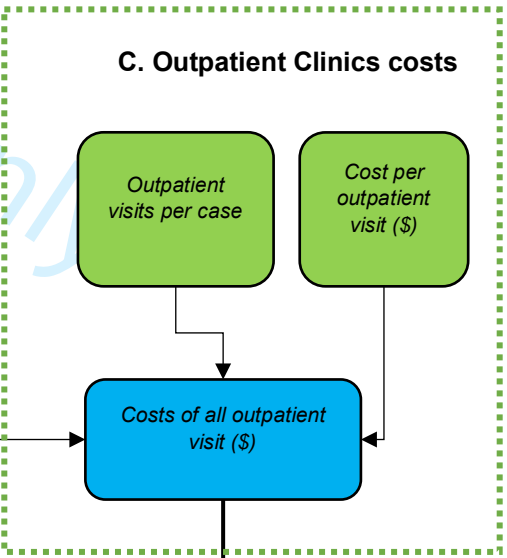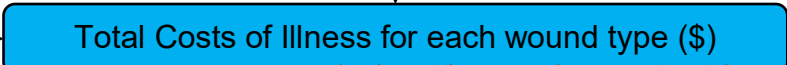

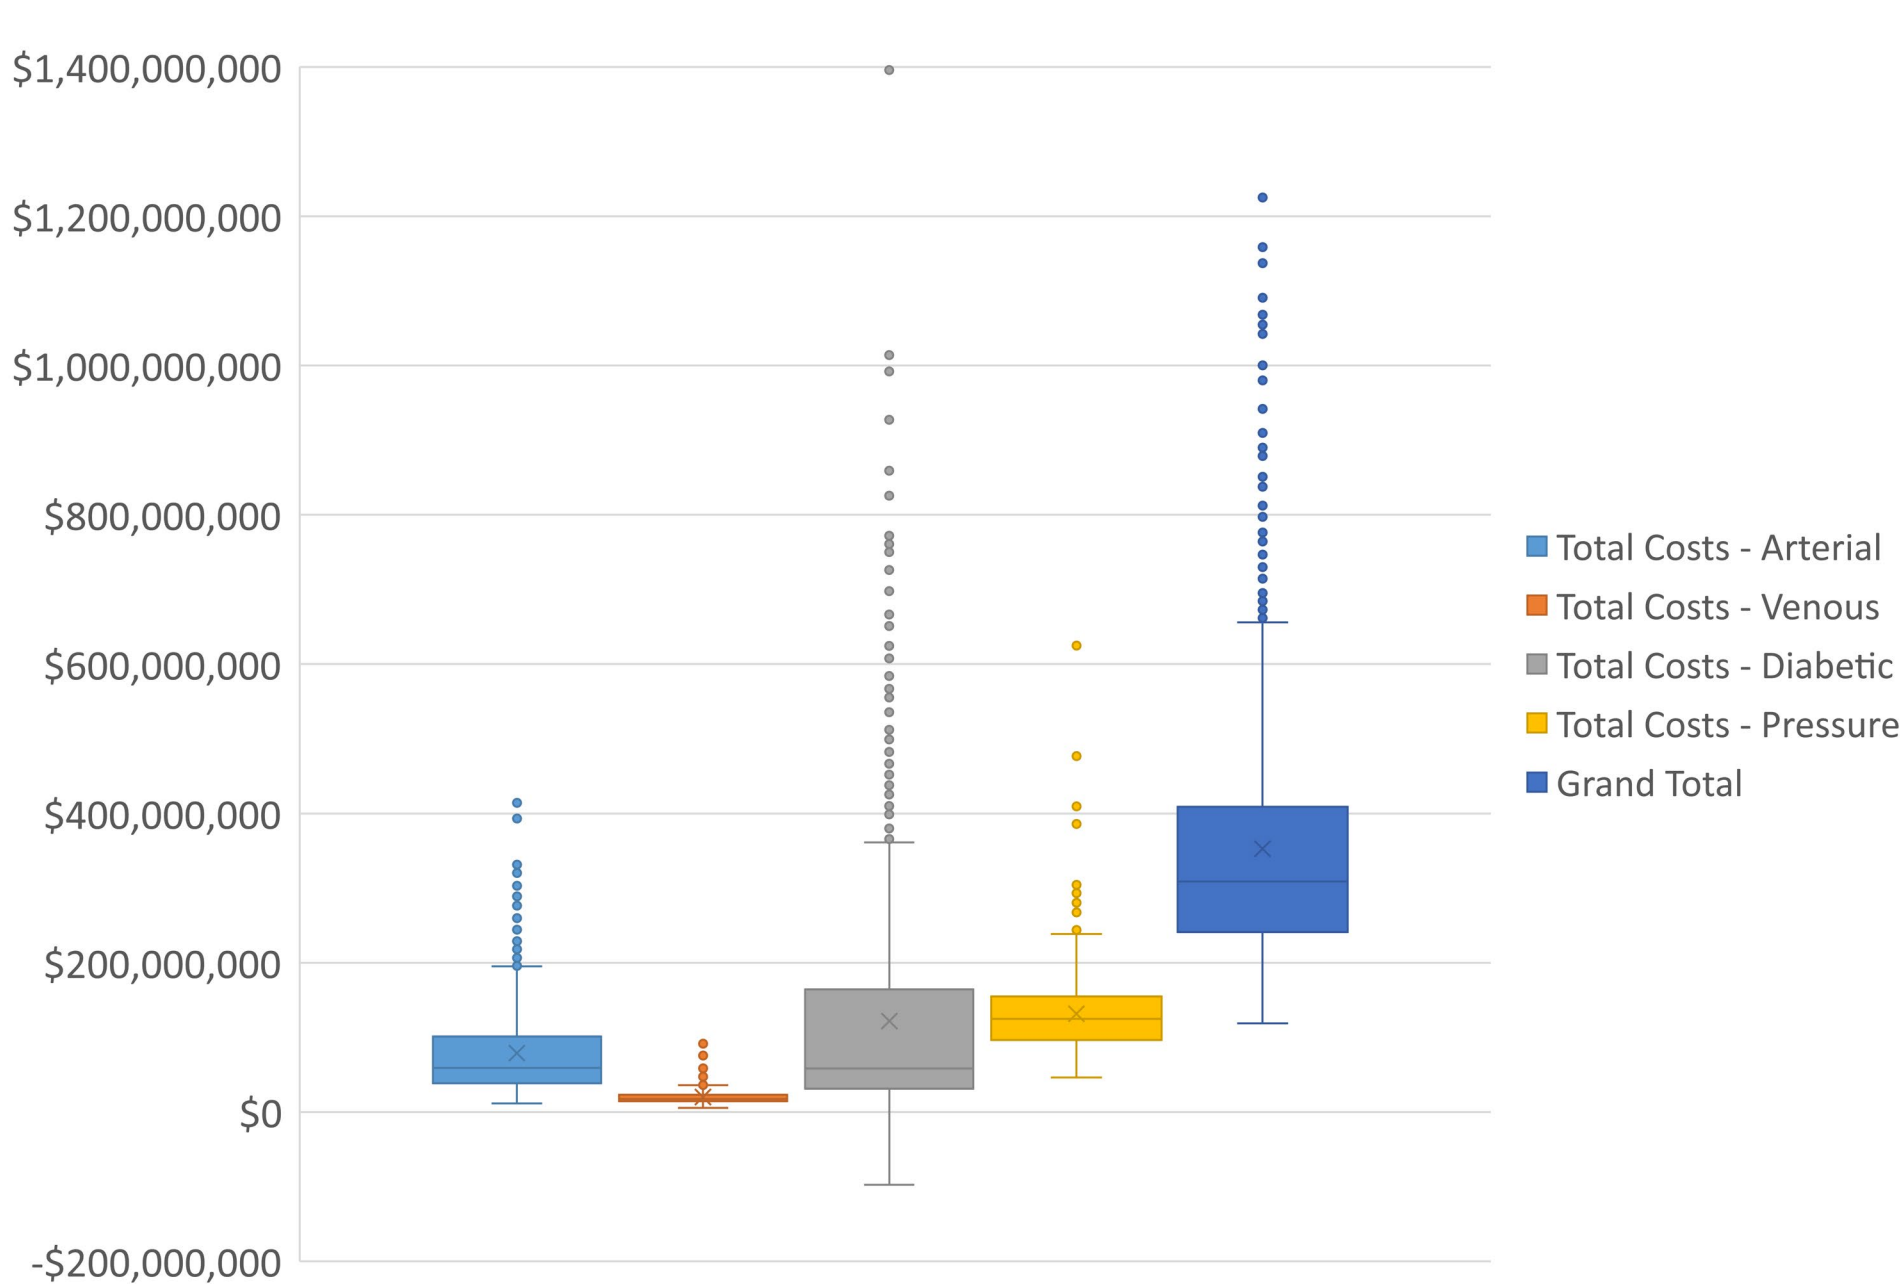

1  
2  
3  
4  
5  
6  
7  
8  
9  
10  
11  
12  
13  
14  
15  
16  
17  
18  
19  
20  
21  
22  
23  
24  
25  
26  
27  
28  
29  
30  
31  
32  
33  
34  
35  
36  
37  
38  
39  
40  
41  
42  
43  
44  
45  
46

**Appendix 1. ICD-9 codes used to identify chronic wounds from national claims dataset**

1  
2 Venous ulcers – *ICD-9-AM: 4540, 4532, 4591; ICD-10-AM: I83.0, I83.2, I87.0.*

3  
4 Arterial insufficiency ulcers – *ICD-9-AM: 44023, 44024; ICD-10-AM: I70.23, I70.24*

5  
6 Diabetic ulcers – *ICD-9-AM: 7071, 7078, 7079, 7854 & one of 25070, 25071, 25072 or 25073; ICD-10-AM: E10.73, E11.73, E13.73, E14.73, E10.52, E11.52, E13.52, E14.52,*  
7 *E09.02, E09.52, E10.69, E11.69, E13.69, E14.69*

8  
9 Pressure ulcers – *ICD-9-AM: 7070; ICD-10-AM: L89.0, L89.1, L89.2, L89.3, L89.4, L89.5, L89.6, L89.7, L89.8, L89.9*

10  
11  
12  
13  
14  
15  
16  
17  
18  
19  
20  
21  
22  
23  
24  
25  
26  
27  
28  
29  
30  
31  
32  
33  
34  
35  
36  
37  
38  
39  
40  
41  
42  
43  
44  
45  
46

For peer review only

## Appendix 2. Cohort of all hospital admissions for a relevant chronic wound 2012 to 2019

|                               | All         | No wound    | Arterial    | Venous      | Diabetic    | Pressure    |
|-------------------------------|-------------|-------------|-------------|-------------|-------------|-------------|
| Number                        | 5,196,899   | 5,047,162   | 14,536      | 19,210      | 16,999      | 49,879      |
| Age, mean (st dev)            | 50.4 (26.9) | 49.6 (26.8) | 75 (13.3)   | 72.1 (17.1) | 72.4 (15.7) | 81.7 (13)   |
| Male                          | 49%         | 48%         | 56%         | 57%         | 58%         | 50%         |
| CCI score (mean)              | 4.1         | 4.1         | 6.1         | 4.7         | 5.9         | 4.4         |
| Chinese                       | 64%         | 64%         | 63%         | 60%         | 54%         | 71%         |
| Malay                         | 14%         | 14%         | 17%         | 16%         | 21%         | 13%         |
| Indian                        | 10%         | 10%         | 11%         | 13%         | 13%         | 6%          |
| Others                        | 12%         | 12%         | 9%          | 11%         | 12%         | 10%         |
| COPD                          | 7%          | 7%          | 6%          | 5%          | 5%          | 8%          |
| Diabetes Mellitus             | 42%         | 42%         | 82%         | 57%         | 100%        | 40%         |
| Hypertension                  | 69%         | 68%         | 92%         | 77%         | 88%         | 76%         |
| Dyslipidemia                  | 61%         | 61%         | 84%         | 67%         | 86%         | 59%         |
| Heart Failure                 | 14%         | 14%         | 33%         | 21%         | 27%         | 14%         |
| Renal Failure                 | 24%         | 23%         | 49%         | 30%         | 44%         | 21%         |
| Stroke                        | 17%         | 17%         | 27%         | 19%         | 20%         | 40%         |
| Dementia                      | 6%          | 6%          | 7%          | 5%          | 4%          | 33%         |
| Major Depression              | 6%          | 6%          | 5%          | 5%          | 6%          | 8%          |
| Parkinson                     | 3%          | 3%          | 2%          | 2%          | 1%          | 17%         |
| Schizophrenia                 | 4%          | 4%          | 1%          | 3%          | 2%          | 4%          |
| Length of Stay, mean (st dev) | 6.5(17)     | 6.3 (16.7)  | 16.2 (20.2) | 9.8 (16)    | 14 (18.6)   | 16.8 (25.2) |

**Appendix 3. Summary results of generalised linear model (GLM) with a gamma link function to estimate excess length of stay**

|                                        | All       | No wound   | Arterial            | Venous              | Diabetic            | Pressure            |
|----------------------------------------|-----------|------------|---------------------|---------------------|---------------------|---------------------|
| Number                                 | 5,196,899 | 5,054,937  | 14,536              | 19,210              | 16,999              | 49,879              |
| Length of Stay, mean (st dev)          | 6.5 (17)  | 6.3 (16.7) | 16.2 (20.2)         | 9.8 (16)            | 14 (18.6)           | 16.8 (25.2)         |
| Coefficient (95% CI)                   | -         | -          | 0.722 (0.690,0.754) | 0.303 (0.272,0.333) | 0.701 (0.669,0.733) | 0.543 (0.516,0.570) |
| Rate ratio of length of stay (95% CI)  | -         | -          | 2.059 (1.993,2.126) | 1.353 (1.993,2.126) | 2.015 (1.952,2.081) | 1.722 (1.676,1.769) |
| Estimated mean length of stay (95% CI) | -         | -          | 2.233 (2.215,2.252) | 2.232 (2.215,2.252) | 2.226 (2.208,2.245) | 2.234 (2.216,2.253) |
| Expected length of stay (95% CI)       | -         | -          | 4.598 (4.414,4.788) | 3.02 (4.414,4.788)  | 4.485 (4.31,4.672)  | 3.847 (3.714,3.986) |
| Excess length of stay (95% CI)         | -         | -          | 2.365 (2.199,2.536) | 0.788 (2.199,2.536) | 2.259 (2.102,2.427) | 1.613 (1.498,1.733) |

For peer review only

## Appendix 4. Full results of generalised linear model (GLM) with a gamma link function to estimate excess length of stay

| Co-variate    | Exponentiated coefficients; 95% confidence intervals in brackets |       |          |       |          |       |          |       |
|---------------|------------------------------------------------------------------|-------|----------|-------|----------|-------|----------|-------|
| los_cens      | Arterial                                                         |       | Venous   |       | Diabetic |       | Pressure |       |
| d_ulcer       | 2.059***                                                         |       | 1.353*** |       | 2.015*** |       | 1.722*** |       |
| 95CI          | 1.993                                                            | 2.126 | 1.993    | 2.126 | 1.952    | 2.081 | 1.676    | 1.769 |
| age           | 1.013***                                                         |       | 1.013*** |       | 1.013*** |       | 1.013*** |       |
| 95CI          | 1.013                                                            | 1.013 | 1.013    | 1.013 | 1.013    | 1.013 | 1.013    | 1.013 |
| male          | 1.019***                                                         |       | 1.020*** |       | 1.019*** |       | 1.020*** |       |
| 95CI          | 1.016                                                            | 1.023 | 1.016    | 1.023 | 1.015    | 1.023 | 1.016    | 1.024 |
| 1.Race        | 1                                                                |       | 1        |       | 1        |       | 1        |       |
| 2.Race        | 0.989***                                                         |       | 0.989*** |       | 0.987*** |       | 0.988*** |       |
| 95CI          | 0.983                                                            | 0.994 | 0.983    | 0.994 | 0.982    | 0.992 | 0.983    | 0.993 |
| 3.Race        | 0.903***                                                         |       | 0.902*** |       | 0.902*** |       | 0.904*** |       |
| 95CI          | 0.898                                                            | 0.909 | 0.898    | 0.909 | 0.897    | 0.908 | 0.898    | 0.910 |
| 4.Race        | 0.935***                                                         |       | 0.935*** |       | 0.934*** |       | 0.935*** |       |
| 95CI          | 0.927                                                            | 0.942 | 0.927    | 0.942 | 0.926    | 0.941 | 0.928    | 0.943 |
| dCCI_AMI      | 0.941***                                                         |       | 0.943*** |       | 0.942*** |       | 0.943*** |       |
| 95CI          | 0.936                                                            | 0.946 | 0.936    | 0.946 | 0.937    | 0.948 | 0.938    | 0.948 |
| dCCI_Cancer   | 1.099***                                                         |       | 1.099*** |       | 1.099*** |       | 1.099*** |       |
| 95CI          | 1.094                                                            | 1.105 | 1.094    | 1.105 | 1.093    | 1.105 | 1.094    | 1.105 |
| dCD_DM        | 1.094***                                                         |       | 1.096*** |       | 1.091*** |       | 1.098*** |       |
| 95CI          | 1.090                                                            | 1.099 | 1.090    | 1.099 | 1.087    | 1.096 | 1.093    | 1.102 |
| dCD_Hyp       | 1.076***                                                         |       | 1.077*** |       | 1.077*** |       | 1.078*** |       |
| 95CI          | 1.071                                                            | 1.082 | 1.071    | 1.082 | 1.071    | 1.083 | 1.072    | 1.084 |
| dCD_LPD       | 0.919***                                                         |       | 0.919*** |       | 0.918*** |       | 0.920*** |       |
| 95CI          | 0.914                                                            | 0.923 | 0.914    | 0.923 | 0.914    | 0.923 | 0.916    | 0.925 |
| dCD_HeartFail | 1.040***                                                         |       | 1.040*** |       | 1.041*** |       | 1.041*** |       |
| 95CI          | 1.034                                                            | 1.046 | 1.034    | 1.046 | 1.035    | 1.046 | 1.036    | 1.047 |
| dCCI_Renal    | 1.113***                                                         |       | 1.115*** |       | 1.113*** |       | 1.115*** |       |
| 95CI          | 1.108                                                            | 1.118 | 1.108    | 1.118 | 1.108    | 1.118 | 1.110    | 1.121 |
| dCD_Stroke    | 1.153***                                                         |       | 1.153*** |       | 1.154*** |       | 1.150*** |       |
| 95CI          | 1.148                                                            | 1.159 | 1.148    | 1.159 | 1.149    | 1.159 | 1.144    | 1.155 |
| dCD_Dementia  | 1.144***                                                         |       | 1.143*** |       | 1.143*** |       | 1.132*** |       |

|                   |            |       |            |       |            |       |            |       |
|-------------------|------------|-------|------------|-------|------------|-------|------------|-------|
| 95CI              | 1.135      | 1.152 | 1.135      | 1.152 | 1.134      | 1.151 | 1.124      | 1.141 |
| dCD_MajDepression | 1.086***   |       | 1.086***   |       | 1.086***   |       | 1.085***   |       |
| 95CI              | 1.078      | 1.095 | 1.078      | 1.095 | 1.077      | 1.094 | 1.077      | 1.094 |
| dCD_Parkinson     | 1.155***   |       | 1.154***   |       | 1.154***   |       | 1.143***   |       |
| 95CI              | 1.142      | 1.168 | 1.142      | 1.168 | 1.141      | 1.168 | 1.130      | 1.156 |
| dCD_Schizophrenia | 1.475***   |       | 1.474***   |       | 1.476***   |       | 1.474***   |       |
| 95CI              | 1.459      | 1.492 | 1.459      | 1.492 | 1.460      | 1.493 | 1.458      | 1.491 |
| dCD_COPD          | 0.971***   |       | 0.970***   |       | 0.970***   |       | 0.971***   |       |
| 95CI              | 0.965      | 0.977 | 0.965      | 0.977 | 0.964      | 0.977 | 0.965      | 0.978 |
| dCCI_ModLiver     | 1.003      |       | 1.002      |       | 1.003      |       | 1.003      |       |
| 95CI              | 0.990      | 1.016 | 0.990      | 1.016 | 0.990      | 1.016 | 0.991      | 1.017 |
| dCCI_PUD          | 0.969***   |       | 0.969***   |       | 0.969***   |       | 0.969***   |       |
| 95CI              | 0.964      | 0.975 | 0.964      | 0.975 | 0.964      | 0.975 | 0.963      | 0.975 |
| dCCI_PVD          | 1.226***   |       | 1.244***   |       | 1.234***   |       | 1.248***   |       |
| 95CI              | 1.217      | 1.235 | 1.217      | 1.235 | 1.225      | 1.243 | 1.238      | 1.257 |
| dCCI_SevereLiver  | 1.015      |       | 1.014      |       | 1.016      |       | 1.014      |       |
| 95CI              | 0.999      | 1.032 | 0.999      | 1.032 | 0.999      | 1.033 | 0.998      | 1.031 |
| _cons             | 2.233***   |       | 2.232***   |       | 2.226***   |       | 2.234***   |       |
|                   | 2.215      | 2.252 | 2.215      | 2.252 | 2.208      | 2.245 | 2.216      | 2.253 |
| N                 | 1908832    |       | 1908832    |       | 1908832    |       | 1908832    |       |
|                   | 10790634.3 |       | 10794131.0 |       | 10790860.0 | 1.8   | 10791675.1 | 9.0   |
| BIC               | 10790933.4 |       | 10794430.1 |       | 10791159.1 |       | 10791974.2 |       |

## Appendix 5. The incidence rates by age band, at risk population and incident cases

|          | age band | at risk population | incidence rate per 100,000 | annual incident cases |
|----------|----------|--------------------|----------------------------|-----------------------|
| Venous   | <40      | 1,957,020          | 1.2                        | 23                    |
|          | 40-49    | 614,941            | 7                          | 43                    |
|          | 50-59    | 614,492            | 19.9                       | 122                   |
|          | 60-69    | 466,620            | 37.5                       | 175                   |
|          | 70-79    | 211,447            | 66.7                       | 141                   |
|          | ≥80      | 101,276            | 91.8                       | 93                    |
|          | total    | 3,965,796          |                            | 598                   |
| Arterial | <40      | 1,957,020          | 1.1                        | 22                    |
|          | 40-49    | 614,941            | 15.6                       | 96                    |
|          | 50-59    | 614,492            | 67.5                       | 415                   |
|          | 60-69    | 466,620            | 143.4                      | 669                   |
|          | 70-79    | 211,447            | 246.4                      | 521                   |
|          | ≥80      | 101,276            | 477.9                      | 484                   |
|          | total    | 3,965,796          |                            | 2,206                 |
| Diabetic | <40      | 1,957,020          | 5.8                        | 114                   |
|          | 40-49    | 614,941            | 56.6                       | 348                   |
|          | 50-59    | 614,492            | 175.8                      | 1,080                 |
|          | 60-69    | 466,620            | 368.6                      | 1,720                 |
|          | 70-79    | 211,447            | 758.6                      | 1,604                 |
|          | ≥80      | 101,276            | 1791.1                     | 1,814                 |
|          | total    | 3,965,796          |                            | 6,680                 |
| Pressure | <40      | 1,957,020          | 4.8                        | 94                    |
|          | 40-49    | 614,941            | 22                         | 135                   |
|          | 50-59    | 614,492            | 74.4                       | 457                   |
|          | 60-69    | 466,620            | 236.4                      | 1,103                 |
|          | 70-79    | 211,447            | 844.2                      | 1,785                 |
|          | ≥80      | 101,276            | 3646.5                     | 3,693                 |
|          | total    | 3,965,796          |                            | 7,268                 |



**Appendix 6. EQ-5D scores by type of wound and time from Singapore Wound Registry**

| Mean (Std. Dev.) | Baseline            | month 1             | month 3             | month 6             |
|------------------|---------------------|---------------------|---------------------|---------------------|
| Venous           | 0.57 (0.34) (n=255) | 0.68 (0.31) (n=235) | 0.74 (0.30) (n=242) | 0.74 (0.30) (n=243) |
| Arterial         | 0.44 (0.40) (n=354) | 0.52 (0.42) (n=311) | 0.54 (0.45) (n=303) | 0.58 (0.44) (n=291) |
| Diabetic         | 0.64 (0.42) (n=139) | 0.71 (0.44) (n=128) | 0.72 (0.38) (n=129) | 0.74 (0.43) (n=126) |
| Pressure         | -0.18 (0.50) (n=51) | 0.00 (0.56) (n=43)  | 0.18 (0.54) (n=38)  | 0.11 (0.59) (n=40)  |

For peer review only

**Appendix 7 - SAS code for calculating the local EQ-5D index score from EQ-5D-3L**

```
1
2 *** coding of EQ-5D data: 1 = no problems, 2 = some/moderate problems, 3 = extreme problems;
3 *** mo = mobility, sc = self-care, ua = usual activity, pd = pain/discomfort, ad = anxiety/depression;
4
5 data new; set new;
6   if mo=2 then m2=1; else m2=0;
7   if mo=3 then m3=1; else m3=0;
8   if sc=2 then s2=1; else s2=0;
9   if sc=3 then s3=1; else s3=0;
10  if ua=2 then u2=1; else u2=0;
11  if ua=3 then u3=1; else u3=0;
12  if pd=2 then p2=1; else p2=0;
13  if pd=3 then p3=1; else p3=0;
14  if ad=2 then a2=1; else a2=0;
15  if ad=3 then a3=1; else a3=0;
16  if mo=3 or sc=3 or ua=3 or pd=3 or ad=3 then n3=1; else n3=0;
17  EQ_index = 1 - 0.1678*m2 - 0.3040*m3 - 0.1615*s2 - 0.3465*s3 - 0.2555*u2 - 0.3209*u3 - 0.1462*p2 - 0.2291*p3 - 0.1501*a2 - 0.2784*a3 - 0.2905*n3;
18  if mo=. or sc=. or ua=. or pd=. or ad=. then EQ_index =. ;
19  drop m2 m3 s2 s3 u2 u3 p2 p3 a2 a3 n3; run;
20
21
22
23
24
25
26
27
28
29
30
31
32
33
34
35
36
37
38
39
40
41
42
43
44
45
46
```

**Appendix 8. Mean duration of wounds in days, by age band; Mean (Standard Deviation)**

| Age Band | Venous (n=150) | Diabetic (n=245) | Pressure (n=24) |
|----------|----------------|------------------|-----------------|
| <40      | 133 (92)       | 177 (88)         | 55 (11)         |
| 40-49    | 129 (109)      | 325 (550)        | 86 (24)         |
| 50-59    | 331 (394)      | 224 (216)        | 115 (1)         |
| 60-69    | 223 (269)      | 314 (430)        | 103 (59)        |
| 70-79    | 307 (438)      | 256 (305)        | 105 (115)       |
| ≥80      | 205 (153)      | 160 (138)        | 62 (52)         |

# values for Diabetic were used to proxy 'Arterial' wounds

## Appendix 9 – usage and costs of outpatient services for patients with chronic wounds

|                                                       | with consult        |                       | without consult       |                        |
|-------------------------------------------------------|---------------------|-----------------------|-----------------------|------------------------|
|                                                       | mean (sd)           | 95% CI                | mean (sd)             | 95% CI                 |
| Total annual costs                                    |                     |                       |                       |                        |
| Costs of Outpatient with Consult - Arterial           | \$908.13 (\$778.27) | (\$815.39, \$1000.86) | \$992.01 (\$1241.53)  | (\$844.08, \$1139.94)  |
| Costs of Outpatient with Consult - Venous             | \$685.73 (\$575.30) | (\$603.62, \$767.84)  | \$2381.98 (\$2449.41) | (\$2024.72, \$2739.24) |
| Costs of Outpatient with Consult - Diabetic           | \$918.06 (\$823.40) | (\$752.11, \$1084.01) | \$1068.85 (\$905.06)  | (\$888.33, \$1249.36)  |
| Costs of Outpatient with Consult - Pressure           | \$702.40 (\$525.63) | (\$368.43, \$1036.37) | \$1111.98 (\$1330.34) | (-\$118.38, \$2342.34) |
| Annual visits                                         | mean (sd)           | 95% CI                | mean (sd)             | 95% CI                 |
| No. of Visits of Outpatient with Consult - Arterial   | 8.249 (6.107)       | (7.521, 8.977)        | 8.454 (6.362)         | (7.696, 9.212)         |
| No. of Visits of Outpatient with Consult - Venous     | 5.874 (5.932)       | (5.028, 6.721)        | 23.639 (18.989)       | (20.870, 26.409)       |
| No. of Visits of Outpatient with Consult - Diabetic   | 8.102 (6.209)       | (6.857, 9.347)        | 14.172 (51.225)       | (4.008, 24.336)        |
| No. of Visits of Outpatient with Consult - Pressure   | 6.5 (4.681)         | (3.526, 9.474)        | 9.714 (10.797)        | (-0.271, 19.700)       |
| Cost per Visit                                        | mean (sd)           | 95% CI                | mean (sd)             | 95% CI                 |
| Costs per Visit of Outpatient with Consult - Arterial | \$110.44 (\$46.69)  | (\$104.88, \$116.01)  | \$117.28 (\$87.66)    | (\$106.84, \$127.73)   |
| Costs per Visit of Outpatient with Consult - Venous   | \$133.24 (\$81.05)  | (\$121.67, \$144.80)  | \$106.81 (\$105.11)   | (\$91.48, \$122.14)    |
| Costs per Visit of Outpatient with Consult - Diabetic | \$112.00 (\$66.26)  | (\$98.64, \$125.35)   | \$114.93 (\$39.31)    | (\$107.08, \$122.77)   |
| Costs per Visit of Outpatient with Consult - Pressure | \$111.04 (\$55.19)  | (\$75.97, \$146.10)   | \$124.14 (\$38.92)    | (\$88.14, \$160.13)    |

**Appendix 10. Cohort of all patients who accessed CHAS, Polyclinic or Emergency departments (ED) 2012 to 2019**

|                                                             | CHAS      |           | Polyclinic |           | ED        |           |
|-------------------------------------------------------------|-----------|-----------|------------|-----------|-----------|-----------|
|                                                             | No Wound  | Any Wound | No Wound   | Any Wound | No Wound  | Any Wound |
| Number                                                      | 1,013,104 | 3,463     | 2,600,153  | 1,441     | 2,964,540 | 7,403     |
| Age                                                         | 49.4      | 67.9      | 37         | 65        | 36        | 68        |
| Male                                                        | 46%       | 45%       | 51%        | 57%       | 56%       | 52%       |
| CCI score                                                   | 2.6       | 4.0       | 2.1        | 4.3       | 2.0       | 5.0       |
| Chinese                                                     | 72%       | 78%       | 64%        | 61%       | 52%       | 61%       |
| Malay                                                       | 14%       | 10%       | 12%        | 13%       | 10%       | 17%       |
| Indian                                                      | 6%        | 8%        | 10%        | 20%       | 9%        | 13%       |
| Others                                                      | 9%        | 5%        | 14%        | 6%        | 30%       | 9%        |
| COPD                                                        | 3%        | 4%        | 2%         | 5%        | 3%        | 5%        |
| Diabetes Mellitus                                           | 32%       | 55%       | 28%        | 68%       | 30%       | 70%       |
| Hypertension                                                | 64%       | 82%       | 55%        | 81%       | 56%       | 83%       |
| Dyslipidemia                                                | 61%       | 72%       | 50%        | 78%       | 51%       | 77%       |
| Heart Failure                                               | 4%        | 13%       | 3%         | 15%       | 4%        | 22%       |
| Renal Failure                                               | 10%       | 24%       | 7%         | 26%       | 8%        | 39%       |
| Stroke                                                      | 8%        | 16%       | 7%         | 17%       | 8%        | 26%       |
| Dementia                                                    | 2%        | 6%        | 1%         | 6%        | 2%        | 16%       |
| Major Depression                                            | 3%        | 3%        | 2%         | 4%        | 2%        | 7%        |
| Parkinson                                                   | 1%        | 3%        | 1%         | 2%        | 1%        | 6%        |
| Schizophrenia                                               | 2%        | 2%        | 2%         | 3%        | 2%        | 3%        |
| Average no. of episodes in 12 months from wound/first visit | 3.1       | 6.2       | 1.8        | 2.8       | 1.4       | 2.6       |

**Appendix 11. Results of generalised linear model (GLM) with a Poisson link function to estimate excess use of poly-clinic services, CHAS and ED.**

|                                       |             |             |                       |
|---------------------------------------|-------------|-------------|-----------------------|
| <i>Polyclinic</i>                     | All         | No wound    | Any wound             |
| Number                                | 2601594     | 2600153     | 1441                  |
| Mean no. of episodes in 12 months, SD | 1.85(1.78)  | 1.85(1.77)  | 1.85(1.78)            |
| Median 12 month utilisation, IQR      | 1 (1-2)     | 1 (1-2)     | 2 (1-3)               |
| Coefficient                           |             |             | 0.352 (0.288,0.416)   |
| Rate ratio of Episodes, CI            |             |             | 1.423 (1.333,1.513 )  |
| Estimated mean Episodes, CI           |             |             | 2.157 (2.13,2.184 )   |
| Expected Episodes, CI                 |             |             | 3.069 (3.031 ,3.108 ) |
| Excess Episodes, CI                   |             |             | 0.912 (0.901 ,0.924 ) |
| <i>CHAS</i>                           | All         | No wound    | Any wound             |
| Number                                | 1016567     | 1013104     | 3463                  |
| Mean no. of episodes in 12 months, SD | 3.13 (3.75) | 3.12 (3.73) | 6.18 (7.30)           |
| Median 12 month utilisation, IQR      | 2 (1 - 4)   | 2 (1 - 4)   | 4(2 -8)               |
| Coefficient                           |             |             | 0.685 (0.669 , 0.701) |
| Rate ratio of Episodes, CI            |             |             | 1.984 (1.952 , 2.016) |
| Estimated mean Episodes, CI           |             |             | 3.596 (3.578 , 3.614) |
| Expected Episodes, CI                 |             |             | 7.134 (7.099 , 7.169) |
| Excess Episodes, CI                   |             |             | 3.538 (3.521 , 3.556) |
| <i>ED</i>                             | All         | No wound    | Any wound             |
| Number                                | 2971943     | 2964540     | 7403                  |
| Mean no. of episodes in 12 months, SD | 1.38(1.17)  | 1.38(1.16)  | 1.38(1.17)            |
| Median 12 month utilisation, IQR      | 1 (1-1)     | 1 (1-1)     | 2 (1-3)               |
| Coefficient                           |             |             | 0.343 (0.319 ,0.367 ) |
| Rate ratio of Episodes, CI            |             |             | 1.410 (1.376 ,1.444 ) |
| Estimated mean Episodes, CI           |             |             | 1.531 (1.515 ,1.547 ) |
| Expected Episodes, CI                 |             |             | 2.159 (2.136 ,2.181 ) |
| Excess Episodes, CI                   |             |             | 0.628 (0.621 ,0.634 ) |

# BMJ Open

## Chronic Wounds in a Multi-Ethnic Asian Population. A Cost of Illness Study.

|                                 |                                                                                                                                                                                                                                                                                                                                                                                                                                                                                                                                                                                                                                                                                                                                                                                                                                       |
|---------------------------------|---------------------------------------------------------------------------------------------------------------------------------------------------------------------------------------------------------------------------------------------------------------------------------------------------------------------------------------------------------------------------------------------------------------------------------------------------------------------------------------------------------------------------------------------------------------------------------------------------------------------------------------------------------------------------------------------------------------------------------------------------------------------------------------------------------------------------------------|
| Journal:                        | <i>BMJ Open</i>                                                                                                                                                                                                                                                                                                                                                                                                                                                                                                                                                                                                                                                                                                                                                                                                                       |
| Manuscript ID                   | bmjopen-2022-065692.R2                                                                                                                                                                                                                                                                                                                                                                                                                                                                                                                                                                                                                                                                                                                                                                                                                |
| Article Type:                   | Original research                                                                                                                                                                                                                                                                                                                                                                                                                                                                                                                                                                                                                                                                                                                                                                                                                     |
| Date Submitted by the Author:   | 21-Apr-2023                                                                                                                                                                                                                                                                                                                                                                                                                                                                                                                                                                                                                                                                                                                                                                                                                           |
| Complete List of Authors:       | Graves, Nicholas; Duke-NUS Medical School<br>Ganesan, Ganga; Ministry of Health Singapore<br>Tan, Kelvin; Ministry of Health Singapore, Policy Research & Evaluation Division<br>Goh, Orlanda; Singapore General Hospital, Department of Internal Medicine<br>Ho, Jackie; National University of Singapore<br>Chong, Tze; Singapore General Hospital,<br>Bishnoi, Priya; A*STAR,<br>Carmody, David; Singapore General Hospital, Department of Internal Medicine<br>Yuh, Ang Shin; Singapore General Hospital<br>Ng, Yi Zhen; Skin Research Institute of Singapore,<br>Lo, Zhiwen; National Healthcare Group Woodlands Health Campus<br>Enming, Yong; Tan Tock Seng Hospital<br>Abu Bakar Aloweni, Fazila; Singapore General Hospital, Nursing Division<br>Zifei, Wang; Skin Research Institute of Singapore<br>Harding, Keith; A*STAR |
| <b>Primary Subject Heading</b>: | Health economics                                                                                                                                                                                                                                                                                                                                                                                                                                                                                                                                                                                                                                                                                                                                                                                                                      |
| Secondary Subject Heading:      | Health policy, Health services research, Epidemiology                                                                                                                                                                                                                                                                                                                                                                                                                                                                                                                                                                                                                                                                                                                                                                                 |
| Keywords:                       | GENERAL MEDICINE (see Internal Medicine), HEALTH ECONOMICS, HEALTH SERVICES ADMINISTRATION & MANAGEMENT, WOUND MANAGEMENT                                                                                                                                                                                                                                                                                                                                                                                                                                                                                                                                                                                                                                                                                                             |
|                                 |                                                                                                                                                                                                                                                                                                                                                                                                                                                                                                                                                                                                                                                                                                                                                                                                                                       |

SCHOLARONE™  
Manuscripts



I, the Submitting Author has the right to grant and does grant on behalf of all authors of the Work (as defined in the below author licence), an exclusive licence and/or a non-exclusive licence for contributions from authors who are: i) UK Crown employees; ii) where BMJ has agreed a CC-BY licence shall apply, and/or iii) in accordance with the terms applicable for US Federal Government officers or employees acting as part of their official duties; on a worldwide, perpetual, irrevocable, royalty-free basis to BMJ Publishing Group Ltd ("BMJ") its licensees and where the relevant Journal is co-owned by BMJ to the co-owners of the Journal, to publish the Work in this journal and any other BMJ products and to exploit all rights, as set out in our [licence](#).

The Submitting Author accepts and understands that any supply made under these terms is made by BMJ to the Submitting Author unless you are acting as an employee on behalf of your employer or a postgraduate student of an affiliated institution which is paying any applicable article publishing charge ("APC") for Open Access articles. Where the Submitting Author wishes to make the Work available on an Open Access basis (and intends to pay the relevant APC), the terms of reuse of such Open Access shall be governed by a Creative Commons licence – details of these licences and which [Creative Commons](#) licence will apply to this Work are set out in our licence referred to above.

Other than as permitted in any relevant BMJ Author's Self Archiving Policies, I confirm this Work has not been accepted for publication elsewhere, is not being considered for publication elsewhere and does not duplicate material already published. I confirm all authors consent to publication of this Work and authorise the granting of this licence.



## Chronic Wounds in a Multi-Ethnic Asian Population. A Cost of Illness Study

Nicholas Graves. Health Services & Systems Research, Duke-NUS Medical School, Singapore.

Ganga Ganesan. Policy and Research Division, Ministry of Health, Singapore.

Kelvin Tan. Policy and Research Division, Ministry of Health, Singapore.

Orlanda Qi Mei Goh. Department of Internal Medicine, Singapore General Hospital, Singapore.

Jackie Ho. Department of Cardiac, Thoracic and Vascular Surgery, National University Health System, Singapore, Singapore.

Chong Tze Tec. Department of Vascular Surgery, Singapore General Hospital.

Priya Bishnoi. Wound Care Innovation for the Tropics Programme, Skin Research Institute of Singapore, A\*STAR, Singapore.

David Carmody. Department of Internal Medicine, Singapore General Hospital, Singapore.

Ang Shin Yuh. Singapore General Hospital, Singapore.

Ng Yi Zhen. Wound Care Innovation for the Tropics Programme, Skin Research Institute of Singapore, A\*STAR, Singapore.

Zhiwen Lo. Vascular Surgery Service, Tan Tock Seng Hospital, Singapore.

Yong Enming. Vascular Surgery Service, Tan Tock Seng Hospital, Singapore.

Fazila Binte Abu Bakar. Aloweni Singapore General Hospital, Singapore.

Wang Zifei. Wound Care Innovation for the Tropics Programme, Skin Research Institute of Singapore, A\*STAR, Singapore.

Keith Harding. Wound Care Innovation for the Tropics Programme, Skin Research Institute of Singapore, A\*STAR, Singapore.

Corresponding. Nicholas Graves Professor of Health Economics | Deputy Director Health Services & Systems Research, Duke-NUS Medical School | 8 College Road, Singapore 169857 | +65 8333 5906 | n.graves@duke-nus.edu.sg | www.duke-nus.edu.sg

Words. 3500

## Abstract

Objective. To estimate the 'cost of illness' arising from chronic wounds in Singapore.

Design. Incidence based cost of illness study using evidence from a range of sources.

Setting: Singapore health services.

Participants. We consider 3.49 million Singapore citizens and permanent residents. There are 16,752 new individuals with a chronic wound in 2017, with 598 venous ulcers, 2,206 arterial insufficiency ulcers, 6,680 diabetic ulcers and 7,268 pressure injuries.

Primary outcome measures expressed in monetary terms are the: value of all hospital bed days lost for the population; monetary value of QALYs lost in the population; costs of all outpatient visits; and, costs of all poly clinic, use of community health assist scheme (CHAS) and emergency departments (ED) visits.

Intermediate outcomes that inform the primary outcomes are also estimated.

Results: Total annual cost of illness was \$350 million (range \$72 to 1,779 million). With 168,503 acute bed days taken up annually (range 141,966 to 196,032) that incurred costs of \$139 million (range 117 to 161 million). Total costs to health services were \$184 million (range \$120 to \$1,179 million). Total annual costs of lost health were 2,077 QALYS (range -2,657 to 29,029) valued at \$166 million (range -212 to 2,399 million).

Conclusions. The costs of chronic wounds are large to Singapore. Many of them could be avoided by making positive investments in integrated and comprehensive wound prevention and treatment programmes.

### Strengths and limitations of this study

- Reliable and relevant data sources were used to update the results
- First study to quantify the national cost of chronic wounds in a multi-ethnic Asian population
- Some important costs were excluded as no information was available
- The sample size for the preference based utility weights for QALYS were small
- Some outcomes were not adjusted for co-morbidities and so might overstate the true costs.

## 1 Introduction

2  
3  
4 Chronic wounds are those that fail to heal in a time sufficient for 'normal' healing. They tend to present as a  
5 co-morbid rather than primary condition among older individuals. Other risk factors are diabetes, poor  
6 nutrition, incontinence and reduced mobility [1]. They have been described as causing a 'silent epidemic'  
7 that affects a large proportion of the world's population [2]. Chronic wounds are prevalent among vulnerable  
8 individuals living at home and residents of long-term care facilities. They are commonly associated with  
9 extended hospital stays but patient safety programmes have reduced healthcare associated events [3].  
10  
11  
12  
13  
14

15 The burden of cost is particularly large [4] with 3% of the total NHS budget [5] and 4% of health care  
16 expenditure in Scandinavian countries used to manage the consequences of chronic wounds [6]. The goal of  
17 reducing the prevalence of chronic wounds has failed to attract sustained investment from those who pay for  
18 health services [7]. This contrasts with other major diseases, where payers are prepared to invest in 'cancer  
19 moonshots' for example [8], that will hopefully lead to better outcomes the future. This inequity is puzzling  
20 as the technology for reducing chronic wounds is available now, saves more than it costs to implement [9],  
21 and will cause large and certain gains in health outcomes.  
22  
23  
24  
25  
26  
27

28 Ulcers of the skin are the most common type of chronic wounds and include venous ulcers, arterial ulcers,  
29 diabetic foot ulcers and pressure ulcers or injuries. There are associated with a wide range of economic costs  
30 [2]. Affected individuals require frequent evidence-based treatments and if the condition becomes  
31 overwhelming an admission to hospital is inevitable. Many patients will be admitted for other reasons, and  
32 the wound may independently prolong hospital stay [10]. Debridement, minor amputations, and major  
33 amputations are common among higher risk groups [11, 12]. Chronic wounds are prevalent among residents  
34 of aged care facilities and will incur additional costs for staff time and consumables. Home nursing services  
35 as well as charities and volunteer groups that support the frail and elderly in their homes also manage  
36 patients [13]. Out of pocket expenditures will arise for patients and family members who travel to access  
37 services and purchase consumable items [14]. Productivity losses will arise as the patients are unable to  
38 perform their normal activities, be they paid or unpaid, and family members will have to take time from  
39 waged and unwaged productive activity. Health-related quality of life, which has monetary value [15], will  
40 be reduced. All these costs can be structured by a 'cost of illness' method [16].  
41  
42  
43  
44  
45  
46  
47  
48  
49  
50  
51

52 The aim of this study is to estimate the 'cost of illness' arising from chronic wounds in Singapore. Our  
53 results could be used to stimulate decision makers to invest in known prevention and management  
54 programmes. The findings will also aid researchers who wish to model the cost savings or the cost-  
55 effectiveness of specific interventions.  
56  
57  
58  
59  
60

## Method

### Scope of the Analyses

We include all resident Singapore Citizens and Permanent Residents (n=3.49M) and exclude resident foreign nationals and long-term employment pass holders (n=526,000) in 2017 [17]. Singapore has a multi-ethnic Asian population comprising of residents who are 76% Chinese, 15% Malay and 7.5% Indian descent [18]. The perspective for this analysis includes the costs incurred by health services and the losses to health benefits, expressed as QALYs foregone. We do not represent the ‘societal’ perspective as there are no data on private out of pocket costs, but we do review this omission in the Discussion. We estimate the expected annual costs arising from incident cases of venous ulcers, arterial insufficiency ulcers, diabetic ulcers and pressure injury.

### Scope of the Modelling

We use statistical models to estimate four primary outcomes for the year 2017, see Figure 1.

#### FIGURE 1 HERE

First, are the monetary ‘*value of all hospital bed days lost for the population*’. The information used is summarised in Part A of Figure 1 and is labelled Inpatient ‘Acute Sector Costs’. Second, are the ‘*monetary value of QALYs lost in the population*’. The information used is summarised in Part B of Figure 1 and is labelled ‘Lost Health Outcomes’. Third, are the ‘*costs of all outpatient visits*’. The information used is summarised in Part C of Figure 1 and is labelled ‘Outpatient Clinics Costs’. Fourth, are the ‘*costs of all poly clinic, use of community health assist scheme (CHAS) and emergency departments (ED) visits*’. The information used is summarised in Part D of Figure 1 and is labelled ‘Primary Care and ED costs’. CHAS is a mechanism for funding all Singapore Citizens to attend medical and or dental care at participating General Practitioner (GP) and dental clinics. CHAS is particularly designed to support the management of chronic diseases.

### Data, Parameters and Assumptions

#### A. Inpatient Acute Sector Costs

Two outcomes, shown by blue boxes in Figure 1, are estimated: ‘*Number of bed days lost per case*’ and ‘*Value of all hospital bed days lost for population (\$)*’. To estimate the ‘*Number of bed days lost per case*’ we combined information on the ‘*Number of admissions to hospital with wounds*’ with information on ‘*Excess acute hospital stay due to a wound*’. To estimate the ‘*Number of admissions to hospital with wounds*’ we retrieved a population cohort of all inpatient admissions to acute hospitals in Singapore between

2012 and 2019 from the Singapore Ministry of Health, and applied the cases from 2017. From the entire dataset we identified all inpatient episodes with any occurrence of Venous ulcers, Arterial insufficiency ulcers, Diabetic ulcers and Pressure injury or any combination of these wounds as a primary or secondary diagnosis based on the ICD-9 codes in Appendix 1.

To estimate '*Excess acute hospital stay due to wound*' we extracted the length of hospital stay and relevant co-variate information that could be used to explain variation in the length of stay, see Appendix 2. A parsimonious multivariable generalised linear model (GLM) with a gamma link function was used to accommodate the skew typical of lengths of stay data [19]. The outcome of interest was the length of stay associated with chronic wound management in the inpatient setting. Other covariates included were age, gender, race, and comorbid chronic diseases. The statistical model generated a coefficient for 'wound type' expressed as a rate ratio, that showed the amount of increase in length of stay associated with the presence of wound, given that other factors that predicted length of stay had been accounted for. This rate ratio was used to moderate the mean length of stay for the entire sample and an excess length of stay associated with the wound was estimated. In Appendix 3 we show a summary of the results of the multivariable generalised linear model and in Appendix 4 we show the full model results.

To estimate the '*Value of all hospital bed days lost for population (\$)*' we combined the '*Number of bed days lost per case*' with the '*Cost per bed day (\$)*'.

All the data inputs used for this part of the model are shown in Table 1.

**Table 1. Data inputs used to estimate the outcomes for the 'Inpatient Acute Sector Costs'**

| Parameter                                      | Estimate | Distribution used for uncertainty |                                                     |
|------------------------------------------------|----------|-----------------------------------|-----------------------------------------------------|
| Excess acute hospital stay due to wound (days) |          |                                   |                                                     |
| Arterial                                       | 2.37     | Gamma (757, 0.0031)               | Estimated by multivariable generalised linear model |
| Venous                                         | 0.79     | Gamma (84, 0.0094)                |                                                     |
| Diabetic                                       | 2.26     | Gamma (742, 0.003)                |                                                     |
| Pressure                                       | 1.61     | Gamma (724, 0.0022)               |                                                     |
| Number of admissions to hospital with wounds   |          |                                   |                                                     |
| Arterial                                       | 14,536   | Fixed                             | #                                                   |
| Venous                                         | 19,210   | Fixed                             |                                                     |
| Diabetic                                       | 16,999   | Fixed                             |                                                     |
| Pressure                                       | 49,879   | Fixed                             |                                                     |
| Cost per bed day (\$)                          | 823      | Normal(823, 2.78)                 | #                                                   |

# Ministry of Health, *Administrative database*, Ministry of Health (MOH). Accessed in 2021.

## B. Lost Health Outcomes

Five outcomes, shown by blue boxes in Figure 1, are estimated: *Annual cases by wound type*; *Number of QALYs lost per case (by age group)*; *Utility decrement*; *Number of QALYs lost in population*; and, *Monetary value of QALYs lost in the population (\$)*. The first four are intermediate outcomes that contribute information to the primary outcome of '*Monetary value of QALYs lost in the population (\$)*'.

1 To estimate '*Annual cases by wound type*' we apply the incidence rates for each wound type to the '*Total at*  
2 *risk population*'. We used published incidence rates for 2017 from a population-based study of wounds  
3 among those admitted to Singapore acute care hospitals from 2000 to 2017 [20]. For this work the authors  
4 identified relevant ICD-10 codes for occurrences of venous ulcers, arterial insufficiency ulcers, diabetic  
5 ulcers, and pressure ulcers or injuries, see Appendix 1, and applied them to the Singapore Ministry of Health  
6 central claims database, which includes records of all admissions to public and private acute care hospitals.  
7 The incidence rates by age band are reported alongside the at-risk population enabling the number of  
8 incident cases to be estimated, see Appendix 5 for more detail.  
9  
10  
11  
12  
13  
14

15 To estimate the '*Number of QALYs lost per case (by age group)*' we use EQ-5D-5L data. This instrument  
16 includes preference based valuations of health states expressed as 'health utilities' on a scale between zero,  
17 the worst possible health state, and one, the best possible health state [21]. We used EQ-5D-5L data from  
18 799 individuals with relevant wounds from the Singapore wound care registry to inform the '*Health utility*  
19 *for cases with specific wound type*'. Responses were recorded at entry into the registry, when the wound was  
20 first assessed in the hospital setting and then at 1, 3 and 6 months, see Appendix 6. We used a Singapore  
21 EQ-5D-3L value set [22] that was then mapped onto the EQ-5D-5L version using the SAS code in Appendix  
22 7. The utility outcomes for the wound patients are compared to population norms for the EQ-5D index  
23 informed by Singapore preference weights for appropriate age bands [23], this informs the '*Population*  
24 *normal Utility (by age)*'. Using the information described above we are able to estimate the '*Utility*  
25 *Decrement*' from having a wound. The '*Duration of Wound*' was informed by the mean durations of wounds  
26 in days for the specific wound types from the Singapore Wound Registry, see Appendix 8. The '*Number of*  
27 *QALYs lost in population*' is the product of the '*Number of QALYs lost per case*' and the '*Annual cases by*  
28 *wound type*'. The '*Monetary value of QALYs lost in the population*' is the product of the '*Number of QALYs*  
29 *lost in population*' and the '*Value of one QALY*', which is set at the mean gross domestic product per capita  
30 for Singapore of SGD \$80,000 [24]. This approach assumes the value of one year of perfect quality of life  
31 does not exceed the per capita gross domestic product [25].  
32  
33  
34  
35  
36  
37  
38  
39  
40  
41  
42  
43  
44  
45

46 All the data inputs used for this part of the model are shown in Table 2.  
47  
48  
49  
50  
51  
52  
53  
54  
55  
56  
57  
58  
59  
60

**Table 2. Data inputs used to estimate the outcomes for the ‘Lost Health Outcomes’**

| Parameter                                                  | Estimate | Distribution used for uncertainty |                          |  |
|------------------------------------------------------------|----------|-----------------------------------|--------------------------|--|
| <i>Health utility for cases with specific wound type</i>   |          |                                   |                          |  |
| Arterial – baseline                                        | 0.44     | Beta (0.24, 0.30)                 | Singapore Wound Registry |  |
| Venous – baseline                                          | 0.57     | Beta (0.60, 0.46)                 |                          |  |
| Diabetic – baseline                                        | 0.64     | Beta (0.21, 0.12)                 |                          |  |
| Pressure – baseline                                        | -0.18    | Normal (-0.18, 0.50)              |                          |  |
| Arterial – month 1                                         | 0.52     | Beta (0.23, 0.21)                 |                          |  |
| Venous – month 1                                           | 0.68     | Beta (0.89, 0.41)                 |                          |  |
| Diabetic – month 1                                         | 0.71     | Beta (0.04, 0.02)                 |                          |  |
| Pressure – month 1                                         | 0.00     | Normal (0.00, 0.56)               |                          |  |
| Arterial – month 3                                         | 0.54     | Beta (0.13, 0.11)                 |                          |  |
| Venous – month 3                                           | 0.74     | Beta (0.81, 0.28)                 |                          |  |
| Diabetic – month 3                                         | 0.72     | Beta (0.28, 0.11)                 |                          |  |
| Pressure – month 3                                         | 0.18     | Normal (0.18, 0.54)               |                          |  |
| Arterial – month 6                                         | 0.58     | Beta (0.16, 0.12)                 |                          |  |
| Venous – month 6                                           | 0.74     | Beta (0.83, 0.28)                 |                          |  |
| Diabetic – month 6                                         | 0.74     | Beta (0.05, 0.02)                 |                          |  |
| Pressure – month 6                                         | 0.11     | Normal (0.11, 0.59)               |                          |  |
| <i>Population normal utility (by age group)</i>            |          |                                   |                          |  |
| <40                                                        | 0.980    | Beta (350, 7)                     | [23]                     |  |
| 40-49                                                      | 0.950    | Beta (636, 33)                    |                          |  |
| 50-59                                                      | 0.940    | Beta (535, 34)                    |                          |  |
| 60-69                                                      | 0.960    | Beta (193, 8)                     |                          |  |
| 70-79                                                      | 0.890    | Beta (189, 23)                    |                          |  |
| ≥80                                                        | 0.890    | Beta (189, 23)                    |                          |  |
| <i>Value of one QALY (\$)</i>                              | 80,000   | Fixed                             | [24]                     |  |
| <i>Durations of Arterial wounds in days (by age group)</i> |          |                                   |                          |  |
| <40                                                        | 133      | Normal(133,92)                    | Singapore Wound Registry |  |
| 40-49                                                      | 129      | Normal(129,109)                   |                          |  |
| 50-59                                                      | 331      | Normal(331,394)                   |                          |  |
| 60-69                                                      | 223      | Normal(223,269)                   |                          |  |
| 70-79                                                      | 307      | Normal(307,438)                   |                          |  |
| ≥80                                                        | 205      | Normal(205,153)                   |                          |  |
| <i>Durations of Venous wounds in days (by age group)</i>   |          |                                   |                          |  |
| <40                                                        | 133      | Normal(133,92)                    |                          |  |
| 40-49                                                      | 129      | Normal(129,109)                   |                          |  |
| 50-59                                                      | 331      | Normal(331,394)                   |                          |  |
| 60-69                                                      | 223      | Normal(223,269)                   |                          |  |
| 70-79                                                      | 307      | Normal(307,438)                   |                          |  |
| ≥80                                                        | 205      | Normal(205,153)                   |                          |  |
| <i>Durations of Diabetic wounds in days (by age group)</i> |          |                                   |                          |  |
| <40                                                        | 177      | Normal(177,88)                    |                          |  |
| 40-49                                                      | 325      | Normal(325,550)                   |                          |  |
| 50-59                                                      | 224      | Normal(224,216)                   |                          |  |
| 60-69                                                      | 314      | Normal(314,430)                   |                          |  |
| 70-79                                                      | 256      | Normal(256,305)                   |                          |  |
| ≥80                                                        | 160      | Normal(160,138)                   |                          |  |
| <i>Durations of Pressure injury in days (by age group)</i> |          |                                   |                          |  |
| <40                                                        | 55       | Normal(55,11)                     |                          |  |
| 40-49                                                      | 86       | Normal(86,24)                     |                          |  |
| 50-59                                                      | 115      | Normal(115,1)                     |                          |  |
| 60-69                                                      | 103      | Normal(103,59)                    |                          |  |
| 70-79                                                      | 105      | Normal(105,115)                   |                          |  |
| ≥80                                                        | 62       | Normal(62,52)                     |                          |  |

**C. Outpatient Clinics costs**

Only one outcome, ‘Costs of all outpatient visit (\$)’, was estimated. Information was used for the ‘Annual cases by wound type’, ‘Cost per outpatient visit (\$)’ and ‘Outpatient visits per case’

To estimate '*Cost per outpatient visit (\$)*' we interrogated the Singapore wound care registry to identify the annual number of visits for those with chronic wounds and the reported costs per visits, this information was available by wound type. There were 573 individuals for whom these data were reported. Visits were for specialist consultations specifically for their wound, and for podiatry visit or medical tests, see Appendix 9. All the data inputs used for this part of the model are shown in Table 3.

**Table 3. Data inputs used to estimate the outcomes for the 'Outpatient Clinic Costs'**

|                                                  | Estimate | Distribution used for uncertainty | Source                   |
|--------------------------------------------------|----------|-----------------------------------|--------------------------|
| Outpatient visits per case (with consult)        |          |                                   | Singapore Wound Registry |
| Arterial                                         | 8.2      | Gamma (1.82:4.52)                 |                          |
| Venous                                           | 5.9      | Gamma (0.98:5.99)                 |                          |
| Diabetic                                         | 8.1      | Gamma (1.70:4.76)                 |                          |
| Pressure                                         | 6.5      | Gamma (1.93:3.37)                 |                          |
| Outpatient visits per case (without consult)     |          |                                   |                          |
| Arterial                                         | 8.5      | Gamma (1.77:4.79)                 |                          |
| Venous                                           | 23.6     | Gamma (1.55:15.25)                |                          |
| Diabetic                                         | 14.2     | Gamma (0.08:185.15)               |                          |
| Pressure                                         | 9.7      | Gamma (0.81:12.00)                |                          |
| Cost per outpatient visit (with consult) (\$)    |          |                                   |                          |
| Arterial                                         | 110      | Gamma (5.60:19.74)                |                          |
| Venous                                           | 133      | Gamma (2.70:49.30)                |                          |
| Diabetic                                         | 112      | Gamma (2.86:39.20)                |                          |
| Pressure                                         | 111      | Gamma (4.05:27.43)                |                          |
| Cost per outpatient visit (without consult) (\$) |          |                                   |                          |
| Arterial                                         | 117      | Gamma (5.60:19.74)                |                          |
| Venous                                           | 106      | Gamma (2.70:49.30)                |                          |
| Diabetic                                         | 114      | Gamma (2.86:39.20)                |                          |
| Pressure                                         | 124      | Gamma (4.05:27.43)                |                          |

#### D. Primary Care and ED costs

Only one outcome '*Costs of all POLY, CHAS & ED visits (\$)*' was estimated. Information was used for the '*Annual cases by wound type*', '*Cost per POLY, CHAS & ED visit (\$)*' and '*Excess POLY, CHAS & ED visits per case due to wound*'.

For the '*Cost per POLY, CHAS & ED visit (\$)*' we use estimates reported by the Singapore Ministry of Health. To estimate '*Excess POLY, CHAS & ED visits per case due to wound*' the same population cohort for 2012 to 2019 who were admitted as inpatients were interrogated. We identify the use of the Emergency Departments (ED) of acute hospitals and all visits to community-based Polyclinics (POLY) and use of community health assist scheme (CHAS).

We sought to estimate the excess use of these services associated with any chronic wound. For the analysis each patient is counted only once, and those with wounds are only counted when they first appear with any wound, and the number of 12-month visits from the incidence date is the outcome variable. For those without wounds, their 12-month use starts from the first visit during the study period. A parsimonious generalised linear model with a log link Poisson function was used for all regressions. The Poisson



distribution was chosen over the negative binomial distribution based on fitting the model then doing model checks with diagnostic plots and relevant statistics. The outcome of interest was a count of the use of the services. Other covariates included were age, gender, race, Charlson comorbidity index and presence of comorbid conditions, see Appendix 10. The ensuing statistical models generated a coefficient for ‘any wound’ expressed as a rate ratio, that showed the change in the number of visits associated with the presence of wound, given that other factors that predicted variation in these outcomes. As before, the rate ratio was used to moderate the mean counts for the entire sample and an excess number of visits was estimated for all wounds, see Appendix 11. All the data inputs used for this part of the model are shown in Table 4.

**Table 4. Data inputs used to estimate the outcomes for the ‘Primary care and ED Costs’**

| Parameter                                  | Estimate | Distribution used for uncertainty | Source                                                                                  |
|--------------------------------------------|----------|-----------------------------------|-----------------------------------------------------------------------------------------|
| Excess visits for Polyclinics (all wounds) | 0.91     | Gamma (18.33, 0.049)              | Estimated by multivariable generalised linear model                                     |
| Excess visits for CHAS (all wounds)        | 3.54     | Gamma (38.51, 0.091)              |                                                                                         |
| Excess visits for ED (all wounds)          | 0.63     | Gamma (4.18, 0.15)                |                                                                                         |
| Cost per Poly clinic visit                 | \$147    | Normal(147,2.5)                   | Ministry of Health, Administrative database, Ministry of Health (MOH). Accessed in 2021 |
| Cost per CHAS use                          | \$56     | Normal(56,1.14)                   |                                                                                         |
| Cost per ED visit                          | \$352    | Normal(352,.14)                   |                                                                                         |

## Uncertainty & Model Evaluation

Uncertainty for all the outcomes shown in Figure 1 was assessed by probabilistic sensitivity analysis. We take 5,000 Monte Carlo resamples from all the parameters described in Tables 1 to 4. We report the number of ‘acute care bed days lost’ and the number of ‘QALYs lost to chronic wounds’. We then report the findings from the resamples for the primary model outcomes: *Value of all bed days lost for population; Monetary value of QALYS lost in the population; Costs of all outpatient visit; and, Costs of all POLY, CHAS & ED visits.* We sum these four primary outcomes to report the ‘*Total Costs of Illness for each wound type*’. These processes are shown in Figure 1.

## Patient and Public Involvement

The data came from the Singapore Wound Registry and from the Ministry of Health. It was routinely reported data collected for the purpose of managing and planning health services. It was not possible to develop the research question or outcome measures based on the priorities, experience, and preferences of the patients. Patients were not involved patients in the design, recruitment and conduct of the study. Patients who are interested will be able to read the paper.

## Results

There were 16,752 'new' or 'incident' cases for 2017, with 598 venous ulcers, 2,206 arterial insufficiency ulcers, 6,680 diabetic ulcers and 7,268 pressure injuries. The values obtained from the model for 'acute care bed days lost' and the number of 'QALYs lost to chronic wounds' are shown in Table 5.

**Table 5. Annual outcomes for bed days lost and QALYs lost for incident cases (n=16,752)**

| Number of QALYS lost    | mean (min:max)         |
|-------------------------|------------------------|
| Arterial                | 544 (-340:5,436)       |
| Venous                  | 75 (-127:0,971)        |
| Diabetic                | 856 (-1670:16,962)     |
| Pressure                | 602 (-520:6,631)       |
| Number of Bed days lost |                        |
| Arterial                | 34,389 (29269:38,674)  |
| Venous                  | 15,161 (10,044:22,166) |
| Diabetic                | 38,423 (33,445:43,573) |
| Pressure                | 80,530 (69,208:91,619) |

The values obtained from the model for the four primary outcomes are shown in Table 6.

**Table 6. Annual cost outcomes for the primary outcomes (n=16,752)**

| Value of all bed days lost for population      | mean (min:max)                                |
|------------------------------------------------|-----------------------------------------------|
| Arterial                                       | \$28,302,139 (\$24,148,856:\$31,912,933)      |
| Venous                                         | \$12,477,776 (\$8,243,954:\$18,212,629)       |
| Diabetic                                       | \$31,622,397 (\$27,431,880:\$35,693,113)      |
| Pressure                                       | \$66,276,250 (\$57,237,092:\$75,718,807)      |
| Monetary value of QALYS lost in the population |                                               |
| Arterial                                       | \$43,491,588 (-\$27,170,499:\$434,890,646)    |
| Venous                                         | \$5,975,553 (-\$10,153,391:\$77,645,170)      |
| Diabetic                                       | \$68,498,429 (-\$133,624,494:\$1,356,989,736) |
| Pressure                                       | \$48,199,291 (-\$41,617,890:\$530,453,557)    |
| Costs of all outpatient visit                  |                                               |
| Arterial                                       | \$4,233,236 (\$84,899:\$35,360,192)           |
| Venous                                         | \$2,017,189 (\$8,957:\$27,539,296)            |
| Diabetic                                       | \$16,337,217 (\$3,058:\$785,613,392)          |
| Pressure                                       | \$13,859,689 (\$42,824:\$142,991,574)         |
| Primary care & ED costs                        |                                               |
| Costs Polyclinic visits - all wounds           | \$2,245,437 (\$877,197:\$5,715,449)           |
| Costs CHAS episodes of care - all wounds       | \$3,296,040 (\$1,849,062:\$5,930,304)         |
| Costs ED visits - all wounds                   | \$3,730,682 (\$235,741:\$14,456,940)          |

The aggregate of these cost outcomes are the 'Total Costs of Illness for each wound type' and are shown in Table 7 for the entire population of Singapore, and for the average individual.

**Table 7. Annual total costs of illness for each wound type (n=16,752)**

| Total Costs of Illness for each wound type | mean (min:max)                                |                                |
|--------------------------------------------|-----------------------------------------------|--------------------------------|
|                                            | population                                    | individual                     |
| Arterial                                   | \$77,247,993 (\$6,047,354:\$469,696,045)      | \$35,364 (\$383:\$257,207)     |
| Venous                                     | \$20,801,577 (\$5,388,353:\$91,673,830)       | \$35,023 (\$9,064:\$162,054)   |
| Diabetic                                   | \$120,155,304 (-\$97,359,748:\$1,395,843,120) | \$18,095 (-\$17,094:\$231,815) |
| Pressure                                   | \$132,358,039 (\$42,035,656:\$624,864,715)    | \$18,161 (\$3,829:\$73,175)    |
| Total Cost of Illness                      | \$350,562,913 (\$72,814,108:\$1,779,366,924)  | \$21,002 (\$2,664:\$100,366)   |

Based on our estimates pressure injuries account for 48% of the 168,503 bed days lost to chronic wounds and 38% of the \$28.4M outpatients costs. For the non-hospital sector, the costs of CHAS services and ED visits account for most of the burden. The QALY burdens are large for diabetic foot, arterial and pressure injury with venous ulcers having lesser impact. Box plots for the 'Total Costs' outcomes are shown in Figure 2.

FIGURE 2 HERE

There is a 100% probability that the costs of chronic wounds are positive with the most likely value suggesting an annual cost to Singapore of \$350 million. The findings are uncertain with the range of total costs between \$79 million and \$1.78 billion. More than half of the total costs arise from use of health services (\$185 million, 53%) with outpatients accounting for \$37 million (10%) and the use of acute bed days accounting for \$139 million (40%). The value of the lost health by QALYs is substantial at \$165 million, 47% of the total burden.

## Discussion

These findings suggest the costs of chronic wounds to Singapore are large and account for approximately 0.07% of GDP. The total cost burden accounts for 3.14% of the 2019 Government Health Expenditure on services [26] and 2.3% of total economy-wide expenditure on services. Our estimates roughly align with those from other countries. In Australia 2% of the total national health expenditure is used for chronic wounds and in the UK 3% of the national health expenditure is taken up [27]. Two percent of the European health budget [28] is for care of chronic wounds and for Scandinavian countries the costs were found to be 2 to 4% of the total health care expenditure [6].

While the findings are lower than the annual costs of diabetes in Singapore, estimated to be US \$787 million in 2010 [29], the policy response to diabetes has been considerable with a 'War on Diabetes' declared in 2016 to mobilise a national programme to reduce the problem of diabetes [30]. We found two other studies

1 reporting costs of chronic venous leg and neuro-ischemic ulcers in Singapore, but neither study were at a  
2 population level instead focusing on average costs per patient [31, 32].  
3  
4

5 This study likely underestimates the extent of the costs of chronic wounds as relevant information was not  
6 available for many costs we suspect are present. Our data came primarily from patients who were admitted  
7 to the hospital for their wounds. Thus patients with less serious wounds managed in the community are  
8 excluded. We were also unable to identify and include estimates of the private costs incurred by patients and  
9 family members. Other studies have found that such costs can be substantial. For the German setting  
10 Purwins et al. [33] found patients with leg ulcers in a given year spent €424 on topical treatments and drugs,  
11 €486 on out of pocket incidentals, €254 on drug prescriptions and €740 on non-drug treatments.  
12  
13

14 Although no data were available on the time away from work and other production losses, we addressed this  
15 by estimating and valuing lost quality adjusted life years (QALYs). We assume that time in reduced health  
16 states has a relationship with an ability to be economically productive. Thus, the dollar valuations of the lost  
17 QALYs can be thought of as representing lost production from chronic wounds. Most governments are  
18 willing to pay money for services that increase the number of QALYs in a population, given a programme  
19 achieves a marginal QALY below a designated cost [34]. Importantly we did not consider the costs of lost  
20 production for informal carers, which we expect are substantial.  
21  
22

23 There are further limitations to our study. Regarding the estimation of QALY losses, the sample sizes for  
24 EQ5D were quite small for Pressure injury with only 51 patients providing data. It is possible the estimate  
25 would change with a larger and more representative sample. It should be noted that the lowest health utilities  
26 arise from this sample. For example, the values for baseline were -0.18 indicating a health state valued  
27 worse than death, and a value of 0.00, the worst possible health state, was observed for month 1. Values  
28 remained low at 0.18 and 0.11 for the 3 month and 6 month follow-ups. We assumed that the observed  
29 decrement between the population norms for health utility and the estimates from the wound registry were  
30 wholly attributable to the presence of a wound. These QALY estimates did not adjust for the other health  
31 conditions that patients may have, and as such may overstate the QALY losses.  
32  
33

34 To attribute excess acute bed days to the presence of a chronic wound we developed generalised linear  
35 regression models with the outcome of length of stay. While did not have an exhaustive list of control  
36 variables we did find that factors such as race, age, gender, myocardial infarction, cancer, liver disease,  
37 peptic ulcer disease, peripheral vascular disease, renal disease, COPD, dementia, diabetes, heart failure,  
38 hyperlipidemia, lymphoproliferative disease, major depression, Parkinson's, schizophrenia and stroke all  
39 played a role in explaining variation in the observed length of stay. We fitted the best models possible, but  
40 acknowledge there may be some covariate information missing.  
41  
42  
43  
44  
45  
46  
47  
48  
49  
50  
51  
52  
53  
54  
55  
56  
57  
58  
59  
60

1 In summary, this recurring and unnecessary cost burden is a deadweight loss to Singapore health services,  
2 and society in general. It could be reduced if evidence-based and relatively simple prevention and  
3 management programmes were implemented. International evidence [9] reveals that using optimal  
4 prevention practices for diabetic foot ulcers [35] was cost-saving in Peru [36], Australia [37], Thailand [38]  
5 and China [39]. For the prevention of pressure injury nursing led interventions, a quality improvement  
6 collaborative and the standardised use of pressure injury bundles were found to be cost-saving in Denmark  
7 [40], the US and UK [41-44]. And for the prevention of venous leg ulcers, compression therapy, clinical  
8 assessments and use of guidelines were found to be cost-saving in the UK [45, 46] and US [47, 48].  
9

10  
11 Our findings provide fundamental information for researchers who wish to model the cost-effectiveness of  
12 programmes that will improve wound outcomes in the future. Understanding the baseline of costs and  
13 QALY outcomes form a useful start-point for any evaluation of interventions.  
14

## 15 **Conclusions.**

16  
17 The costs of chronic wounds are large to Singapore, but many of them could be avoided by making positive  
18 investments in integrated and comprehensive wound prevention and treatment programmes.  
19

## 20 **Authors contributions.**

21  
22 Nicholas Graves, Ganga Ganesan, Kelvin Tan, Orlanda Qi Mei Goh, Jackie Ho, Chong Tze Tec, Priya  
23 Bishnoi, David Carmody, Ang Shin Yuh, Ng Yi Zhen, Zhiwen Lo, Yong Enming, Fazila Binte, Abu Bakar  
24 Aloweni, Wang Zifei and Keith Harding made substantial contributions to the: conception and design of the  
25 paper, the acquisition, analysis, and interpretation of data; drafting and reviewing versions of the  
26 manuscript; and, final approval of the version submitted. All authors are accountable for all aspects of the  
27 work.  
28

29  
30 **A competing interests statement.** None  
31

32  
33 **Funding.** We would like to acknowledge the funding supported from the Agency for Science, Technology  
34 and Research (A\*STAR) under its Industry Alignment Fund-Pre-Positioning Programme (IAF-PP) grant  
35 number H1901a00Y9/ and H17/01/a0/0CC9 as part of the Wound Care Innovation for the Tropics (WCIT)  
36 Programme.  
37

38  
39 **Data availability statement.** No data from the wound registry or MoH administrative databases are  
40 available. This is due to the privacy considerations of the Singapore MOH and the Singapore wound  
41 registry.  
42  
43

## Ethics Approval

This research study has been approved by the NHG Domain Specific Review Board (DSRB 2019/00917).

## References

1. Raeder, K., et al., *Prevalence and risk factors of chronic wounds in nursing homes in Germany: A Cross-Sectional Study*. *Int Wound J*, 2020. **17**(5): p. 1128-1134.
2. Graves, N., C.J. Phillips, and K. Harding, *A narrative review of the epidemiology and economics of chronic wounds*. *British Journal of Dermatology*. n/a(n/a).
3. Dávila Torres, J., *[To err is human, but to not put processes in place to avoid errors from becoming fatal is inhumane. 5th International Summit of the Patient Safety Movement (PSM), California, USA, 2017]*. *Cir Cir*, 2017. **85**(2): p. 101-103.
4. Olsson, M., et al., *The humanistic and economic burden of chronic wounds: A systematic review*. *Wound Repair Regen*, 2019. **27**(1): p. 114-125.
5. Posnett, J. and P.J. Franks, *The burden of chronic wounds in the UK*. *Nurs Times*, 2008. **104**(3): p. 44-5.
6. Gottrup, F., et al., *A new concept of a multidisciplinary wound healing center and a national expert function of wound healing*. *Archives Of Surgery (Chicago, Ill.: 1960)*, 2001. **136**(7): p. 765-772.
7. Pacella, R.E., et al., *Reimbursement for the cost of compression therapy for the management of venous leg ulcers in Australia*. *Int Wound J*, 2019. **16**(4): p. 1069-1072.
8. Gyawali, B., R. Sullivan, and C.M. Booth, *Cancer groundshot: going global before going to the moon*. *Lancet Oncol*, 2018. **19**(3): p. 288-290.
9. Cheng, Q., N. Graves, and R.E. Pacella, *Economic Evaluations of Guideline-Based Care for Chronic Wounds: a Systematic Review*. *Appl Health Econ Health Policy*, 2018. **16**(5): p. 633-651.
10. Lo, Z.J., et al., *Clinical and economic burden of wound care in the tropics: a 5-year institutional population health review*. *Int Wound J*, 2020. **17**(3): p. 790-803.
11. Fitridge, R., G. Pena, and J.L. Mills, *The patient presenting with chronic limb-threatening ischaemia. Does diabetes influence presentation, limb outcomes and survival?* *Diabetes Metab Res Rev*, 2020. **36** Suppl 1: p. e3242.
12. Sorber, R. and C.J. Abularrage, *Diabetic foot ulcers: Epidemiology and the role of multidisciplinary care teams*. *Semin Vasc Surg*, 2021. **34**(1): p. 47-53.
13. Martinengo, L., et al., *Prevalence of chronic wounds in the general population: systematic review and meta-analysis of observational studies*. *Ann Epidemiol*, 2019. **29**: p. 8-15.
14. Kapp, S. and N. Santamaria, *The financial and quality-of-life cost to patients living with a chronic wound in the community*. *Int Wound J*, 2017. **14**(6): p. 1108-1119.
15. McCabe, C., K. Claxton, and A.J. Culyer, *The NICE cost-effectiveness threshold: what it is and what that means*. *Pharmacoeconomics*, 2008. **26**(9): p. 733-44.
16. Jo, C., *Cost-of-illness studies: concepts, scopes, and methods*. *Clin Mol Hepatol*, 2014. **20**(4): p. 327-37.
17. Ministry of Health *Population in Brief*. Available at <https://www.population.gov.sg/images/PublicationImages/population-in-brief-2017.pdf>. 2022.
18. Department of Statistics, M.o.T.I., Republic of Singapore,, *Census of Population 2020 Statistical Release 1: Demographic Characteristics, Education, Language and Religion*. Available here <https://www.singstat.gov.sg/-/media/files/publications/cop2020/sr1/cop2020sr1.ashx>. 2020.
19. Dodd, S., et al., *A comparison of multivariable regression models to analyse cost data*. *J Eval Clin Pract*, 2006. **12**(1): p. 76-86.
20. Goh, O.Q., et al., *Incidence of chronic wounds in Singapore, a multiethnic Asian country, between 2000 and 2017: a retrospective cohort study using a nationwide claims database*. *BMJ Open*, 2020. **10**(9): p. e039411.
21. Devlin N, P.D., Janssen B,, *Methods for Analysing and Reporting EQ-5D Data*. Available here <https://link.springer.com/content/pdf/10.1007%2F978-3-030-47622-9.pdf>. 2020: Springer.
22. Luo, N., et al., *Valuation of EQ-5D-3L health states in Singapore: modeling of time trade-off values for 80 empirically observed health states*. *Pharmacoeconomics*, 2014. **32**(5): p. 495-507.
23. Abdin, E., et al., *Population norms for the EQ-5D index scores using Singapore preference weights*. *Qual Life Res*, 2015. **24**(6): p. 1545-53.

24. World Bank *GDP per capita (current US\$) - Singapore*, available at <https://data.worldbank.org/indicator/NY.GDP.PCAP.CD?locations=SG>. Accessed June 2021. 2018.
25. Williams A, *What Could be Nicer than NICE? OHE Annual Lecture*. Available here [file:///C:/Users/gmsgnic/Downloads/292%20-%202004\\_What\\_Could\\_Be\\_Nicer\\_Williams.pdf](file:///C:/Users/gmsgnic/Downloads/292%20-%202004_What_Could_Be_Nicer_Williams.pdf), ed. O.o.H. Economics. 2004, London.
26. Ministry of Health Singapore, *GOVERNMENT HEALTH EXPENDITURE AND HEALTHCARE FINANCING*. Available here <https://www.moh.gov.sg/resources-statistics/singapore-health-facts/government-health-expenditure-and-healthcare-financing>. 2022.
27. Posnett, J. and P.J. Franks, *The costs of skin breakdown and ulceration in the UK*, in *Skin Breakdown: The Silent Epidemic*, M. Pownett, Editor. 2007, Hull: Smith & Nephew Foundation.
28. Böttrich, J.G. *Challenges in chronic wound care: the need for interdisciplinary collaboration* [cited 2013 Mach 2]; Available from: <http://www.eucomed.be/blog/108/59/blog/2012/02/23/Challenges-in-chronic-wound-care-the-need-for-interdisciplinary-collaboration>.
29. Png, M.E., et al., *Current and future economic burden of diabetes among working-age adults in Asia: conservative estimates for Singapore from 2010-2050*. BMC Public Health, 2016. **16**: p. 153.
30. Ministry of Health, *WAR ON DIABETES*. Available here <https://www.moh.gov.sg/wodcj>. 2022.
31. Nazeha, N., et al., *The burden of costs on health services from patients with venous leg ulcers in Singapore*. Int Wound J, 2022.
32. Nazeha, N., et al., *The burden of costs on health services by patients with neuro-ischaeamic ulcers in Singapore*. Int Wound J, 2022.
33. Purwins, S., et al., *Cost-of-illness of chronic leg ulcers in Germany*. Int Wound J, 2010. **7**(2): p. 97-102.
34. Rawlins, M.D. and A.J. Culyer, *National Institute for Clinical Excellence and its value judgments*. Bmj, 2004. **329**(7459): p. 224-7.
35. Foot., I.W.G.o.t.D., *International consensus on the diabetic foot*. Amsterdam: International Working Group on the Diabetic Foot. 1999.
36. Cárdenas, M.K., et al., *The cost of illness attributable to diabetic foot and cost-effectiveness of secondary prevention in Peru*. BMC Health Services Research, 2015. **15**(1): p. 483.
37. Cheng, Q., et al., *A cost-effectiveness analysis of optimal care for diabetic foot ulcers in Australia*. Int Wound J, 2017. **14**(4): p. 616-628.
38. Rerkasem, K., et al., *A multidisciplinary diabetic foot protocol at Chiang Mai University Hospital: cost and quality of life*. Int J Low Extrem Wounds, 2009. **8**(3): p. 153-6.
39. Wu, B., X. Wan, and J. Ma, *Cost-effectiveness of prevention and management of diabetic foot ulcer and amputation in a health resource-limited setting*. J Diabetes, 2018. **10**(4): p. 320-327.
40. Mathiesen, A.S.M., et al., *Are labour-intensive efforts to prevent pressure ulcers cost-effective?* Journal of Medical Economics, 2013. **16**(10): p. 1238-1245.
41. Padula, W.V., et al., *Improving the quality of pressure ulcer care with prevention: a cost-effectiveness analysis*. Med Care, 2011. **49**(4): p. 385-92.
42. Thomson, J.S. and R.G. Brooks, *The economics of preventing and treating pressure ulcers: a pilot study*. J Wound Care, 1999. **8**(6): p. 312-6.
43. Xakellis, G.C. and R.A. Frantz, *The Cost-Effectiveness of Interventions for Preventing Pressure Ulcers*. The Journal of the American Board of Family Practice, 1996. **9**(2): p. 79-85.
44. Xakellis, G.C., Jr., et al., *Cost-effectiveness of an intensive pressure ulcer prevention protocol in long-term care*. Adv Wound Care, 1998. **11**(1): p. 22-9.
45. Bosanquet, N., et al., *Community leg ulcer clinics: cost-effectiveness*. Health Trends, 1993. **25**(4): p. 146-8.
46. Simon, D.A., et al., *Community leg ulcer clinics: a comparative study in two health authorities*. Bmj, 1996. **312**(7047): p. 1648-51.
47. Korn, P., et al., *Why insurers should reimburse for compression stockings in patients with chronic venous stasis*. J Vasc Surg, 2002. **35**(5): p. 950-7.
48. McGuckin, M., et al., *Validation of venous leg ulcer guidelines in the United States and United Kingdom*. Am J Surg, 2002. **183**(2): p. 132-7.

**Figure 1. A diagram to show how the various parameters update the outcomes**

**Figure 2. Total cost outcomes for the cost of Illness by wound type**

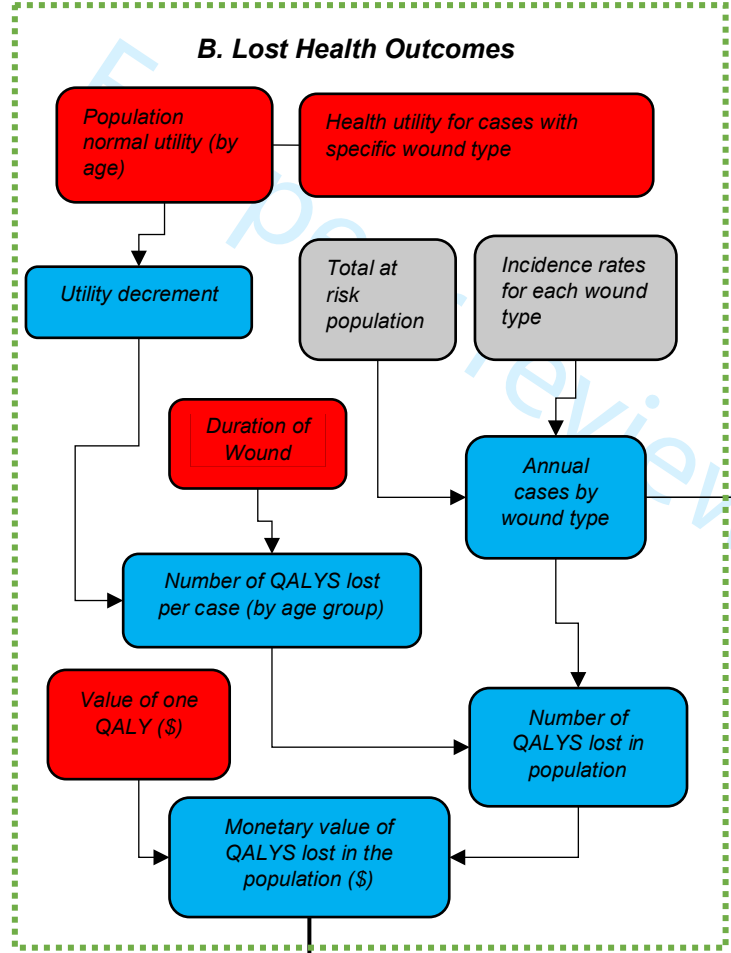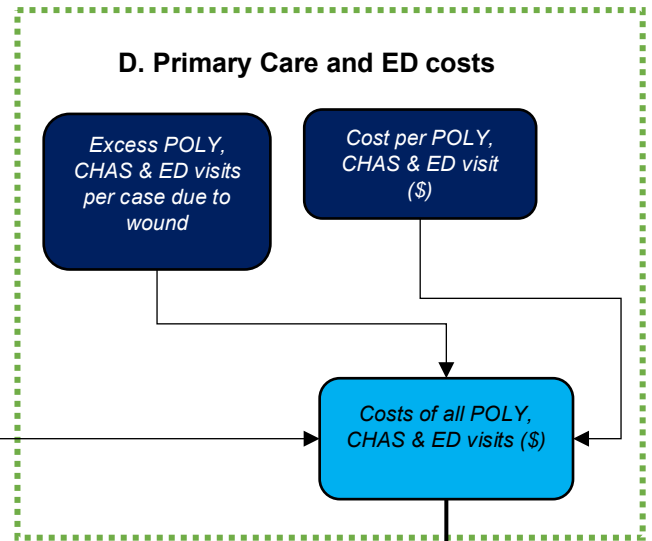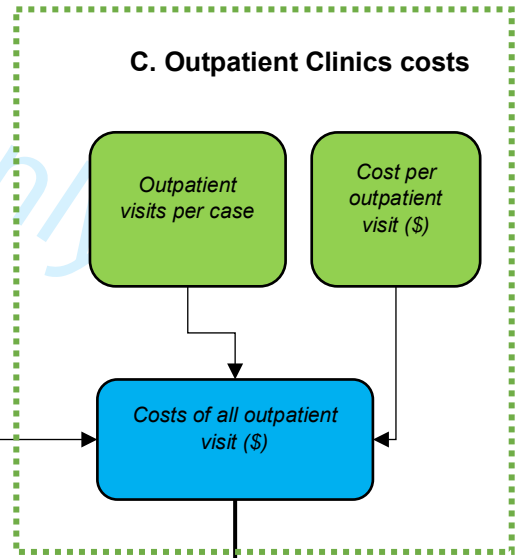



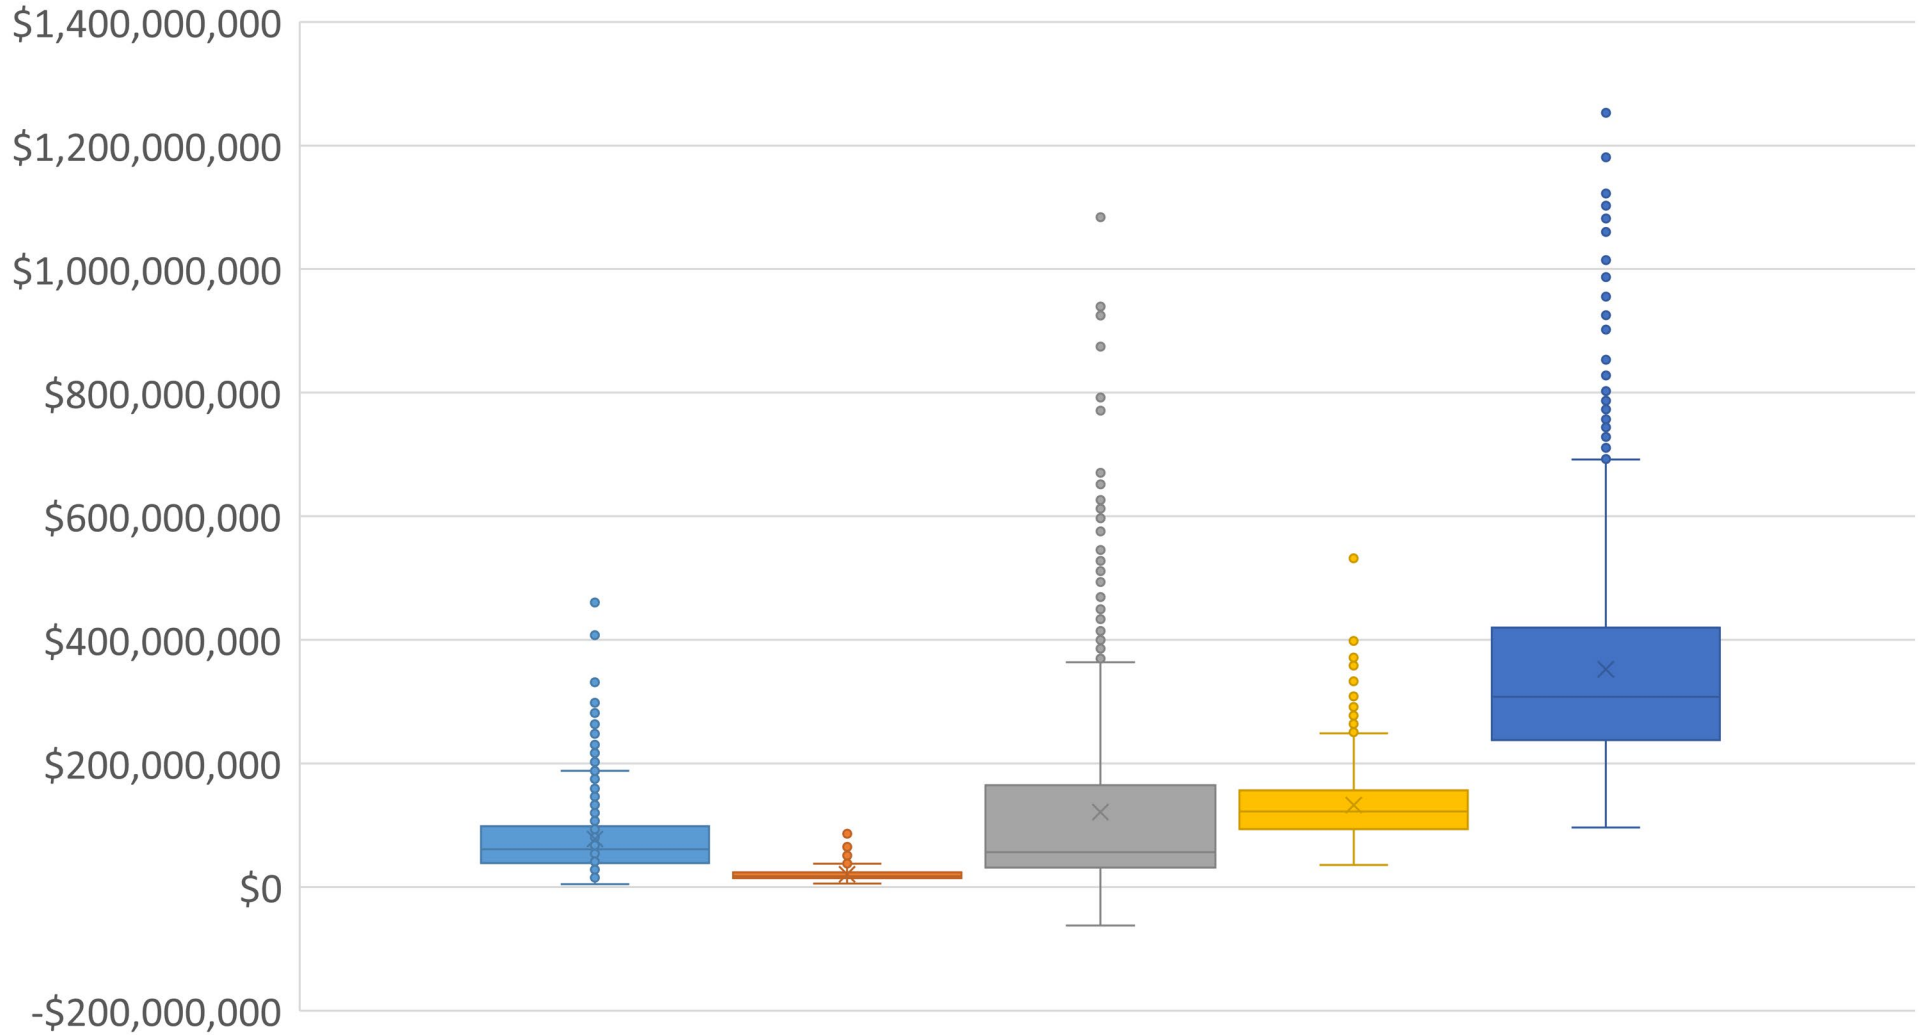

■ Total Costs - Arterial (median = 58,661,499)     ■ Total Costs - Venous (median = 17,701,681)  
■ Total Costs - Diabetic (median = 58,148,362)     ■ Total Costs - Pressure (median = 122,218,981)  
■ Grand Total (median = 306,517,809)

**Appendix 1. ICD-9 codes used to identify chronic wounds from national claims dataset**

1  
2 Venous ulcers – *ICD-9-AM: 4540, 4532, 4591; ICD-10-AM: I83.0, I83.2, I87.0.*

3  
4 Arterial insufficiency ulcers – *ICD-9-AM: 44023, 44024; ICD-10-AM: I70.23, I70.24*

5  
6 Diabetic ulcers – *ICD-9-AM: 7071, 7078, 7079, 7854 & one of 25070, 25071, 25072 or 25073; ICD-10-AM: E10.73, E11.73, E13.73, E14.73, E10.52, E11.52, E13.52, E14.52, E09.02, E09.52, E10.69, E11.69, E13.69, E14.69*

7  
8  
9 Pressure ulcers – *ICD-9-AM: 7070; ICD-10-AM: L89.0, L89.1, L89.2, L89.3, L89.4, L89.5, L89.6, L89.7, L89.8, L89.9*

10  
11  
12  
13  
14  
15  
16  
17  
18  
19  
20  
21  
22  
23  
24  
25  
26  
27  
28  
29  
30  
31  
32  
33  
34  
35  
36  
37  
38  
39  
40  
41  
42  
43  
44  
45  
46

For peer review only

## Appendix 2. Cohort of all hospital admissions for a relevant chronic wound 2012 to 2019

|                               | All         | No wound    | Arterial    | Venous      | Diabetic    | Pressure    |
|-------------------------------|-------------|-------------|-------------|-------------|-------------|-------------|
| Number                        | 5,196,899   | 5,047,162   | 14,536      | 19,210      | 16,999      | 49,879      |
| Age, mean (st dev)            | 50.4 (26.9) | 49.6 (26.8) | 75 (13.3)   | 72.1 (17.1) | 72.4 (15.7) | 81.7 (13)   |
| Male                          | 49%         | 48%         | 56%         | 57%         | 58%         | 50%         |
| CCI score (mean)              | 4.1         | 4.1         | 6.1         | 4.7         | 5.9         | 4.4         |
| Chinese                       | 64%         | 64%         | 63%         | 60%         | 54%         | 71%         |
| Malay                         | 14%         | 14%         | 17%         | 16%         | 21%         | 13%         |
| Indian                        | 10%         | 10%         | 11%         | 13%         | 13%         | 6%          |
| Others                        | 12%         | 12%         | 9%          | 11%         | 12%         | 10%         |
| COPD                          | 7%          | 7%          | 6%          | 5%          | 5%          | 8%          |
| Diabetes Mellitus             | 42%         | 42%         | 82%         | 57%         | 100%        | 40%         |
| Hypertension                  | 69%         | 68%         | 92%         | 77%         | 88%         | 76%         |
| Dyslipidemia                  | 61%         | 61%         | 84%         | 67%         | 86%         | 59%         |
| Heart Failure                 | 14%         | 14%         | 33%         | 21%         | 27%         | 14%         |
| Renal Failure                 | 24%         | 23%         | 49%         | 30%         | 44%         | 21%         |
| Stroke                        | 17%         | 17%         | 27%         | 19%         | 20%         | 40%         |
| Dementia                      | 6%          | 6%          | 7%          | 5%          | 4%          | 33%         |
| Major Depression              | 6%          | 6%          | 5%          | 5%          | 6%          | 8%          |
| Parkinson                     | 3%          | 3%          | 2%          | 2%          | 1%          | 17%         |
| Schizophrenia                 | 4%          | 4%          | 1%          | 3%          | 2%          | 4%          |
| Length of Stay, mean (st dev) | 6.5(17)     | 6.3 (16.7)  | 16.2 (20.2) | 9.8 (16)    | 14 (18.6)   | 16.8 (25.2) |

**Appendix 3. Summary results of generalised linear model (GLM) with a gamma link function to estimate excess length of stay**

|                                        | All       | No wound   | Arterial            | Venous              | Diabetic            | Pressure            |
|----------------------------------------|-----------|------------|---------------------|---------------------|---------------------|---------------------|
| Number                                 | 5,196,899 | 5,054,937  | 14,536              | 19,210              | 16,999              | 49,879              |
| Length of Stay, mean (st dev)          | 6.5 (17)  | 6.3 (16.7) | 16.2 (20.2)         | 9.8 (16)            | 14 (18.6)           | 16.8 (25.2)         |
| Coefficient (95% CI)                   | -         | -          | 0.722 (0.690,0.754) | 0.303 (0.272,0.333) | 0.701 (0.669,0.733) | 0.543 (0.516,0.570) |
| Rate ratio of length of stay (95% CI)  | -         | -          | 2.059 (1.993,2.126) | 1.353 (1.993,2.126) | 2.015 (1.952,2.081) | 1.722 (1.676,1.769) |
| Estimated mean length of stay (95% CI) | -         | -          | 2.233 (2.215,2.252) | 2.232 (2.215,2.252) | 2.226 (2.208,2.245) | 2.234 (2.216,2.253) |
| Expected length of stay (95% CI)       | -         | -          | 4.598 (4.414,4.788) | 3.02 (4.414,4.788)  | 4.485 (4.31,4.672)  | 3.847 (3.714,3.986) |
| Excess length of stay (95% CI)         | -         | -          | 2.365 (2.199,2.536) | 0.788 (2.199,2.536) | 2.259 (2.102,2.427) | 1.613 (1.498,1.733) |

For peer review only

## Appendix 4. Full results of generalised linear model (GLM) with a gamma link function to estimate excess length of stay

| Co-variate    | Exponentiated coefficients; 95% confidence intervals in brackets |       |          |       |          |       |          |       |
|---------------|------------------------------------------------------------------|-------|----------|-------|----------|-------|----------|-------|
| los_cens      | Arterial                                                         |       | Venous   |       | Diabetic |       | Pressure |       |
| d_ulcer       | 2.059***                                                         |       | 1.353*** |       | 2.015*** |       | 1.722*** |       |
| 95CI          | 1.993                                                            | 2.126 | 1.993    | 2.126 | 1.952    | 2.081 | 1.676    | 1.769 |
| age           | 1.013***                                                         |       | 1.013*** |       | 1.013*** |       | 1.013*** |       |
| 95CI          | 1.013                                                            | 1.013 | 1.013    | 1.013 | 1.013    | 1.013 | 1.013    | 1.013 |
| male          | 1.019***                                                         |       | 1.020*** |       | 1.019*** |       | 1.020*** |       |
| 95CI          | 1.016                                                            | 1.023 | 1.016    | 1.023 | 1.015    | 1.023 | 1.016    | 1.024 |
| 1.Race        | 1                                                                |       | 1        |       | 1        |       | 1        |       |
| 2.Race        | 0.989***                                                         |       | 0.989*** |       | 0.987*** |       | 0.988*** |       |
| 95CI          | 0.983                                                            | 0.994 | 0.983    | 0.994 | 0.982    | 0.992 | 0.983    | 0.993 |
| 3.Race        | 0.903***                                                         |       | 0.902*** |       | 0.902*** |       | 0.904*** |       |
| 95CI          | 0.898                                                            | 0.909 | 0.898    | 0.909 | 0.897    | 0.908 | 0.898    | 0.910 |
| 4.Race        | 0.935***                                                         |       | 0.935*** |       | 0.934*** |       | 0.935*** |       |
| 95CI          | 0.927                                                            | 0.942 | 0.927    | 0.942 | 0.926    | 0.941 | 0.928    | 0.943 |
| dCCI_AMI      | 0.941***                                                         |       | 0.943*** |       | 0.942*** |       | 0.943*** |       |
| 95CI          | 0.936                                                            | 0.946 | 0.936    | 0.946 | 0.937    | 0.948 | 0.938    | 0.948 |
| dCCI_Cancer   | 1.099***                                                         |       | 1.099*** |       | 1.099*** |       | 1.099*** |       |
| 95CI          | 1.094                                                            | 1.105 | 1.094    | 1.105 | 1.093    | 1.105 | 1.094    | 1.105 |
| dCD_DM        | 1.094***                                                         |       | 1.096*** |       | 1.091*** |       | 1.098*** |       |
| 95CI          | 1.090                                                            | 1.099 | 1.090    | 1.099 | 1.087    | 1.096 | 1.093    | 1.102 |
| dCD_Hyp       | 1.076***                                                         |       | 1.077*** |       | 1.077*** |       | 1.078*** |       |
| 95CI          | 1.071                                                            | 1.082 | 1.071    | 1.082 | 1.071    | 1.083 | 1.072    | 1.084 |
| dCD_LPD       | 0.919***                                                         |       | 0.919*** |       | 0.918*** |       | 0.920*** |       |
| 95CI          | 0.914                                                            | 0.923 | 0.914    | 0.923 | 0.914    | 0.923 | 0.916    | 0.925 |
| dCD_HeartFail | 1.040***                                                         |       | 1.040*** |       | 1.041*** |       | 1.041*** |       |
| 95CI          | 1.034                                                            | 1.046 | 1.034    | 1.046 | 1.035    | 1.046 | 1.036    | 1.047 |
| dCCI_Renal    | 1.113***                                                         |       | 1.115*** |       | 1.113*** |       | 1.115*** |       |
| 95CI          | 1.108                                                            | 1.118 | 1.108    | 1.118 | 1.108    | 1.118 | 1.110    | 1.121 |
| dCD_Stroke    | 1.153***                                                         |       | 1.153*** |       | 1.154*** |       | 1.150*** |       |
| 95CI          | 1.148                                                            | 1.159 | 1.148    | 1.159 | 1.149    | 1.159 | 1.144    | 1.155 |
| dCD_Dementia  | 1.144***                                                         |       | 1.143*** |       | 1.143*** |       | 1.132*** |       |

|                   |            |       |            |       |            |       |            |       |
|-------------------|------------|-------|------------|-------|------------|-------|------------|-------|
| 95CI              | 1.135      | 1.152 | 1.135      | 1.152 | 1.134      | 1.151 | 1.124      | 1.141 |
| dCD_MajDepression | 1.086***   |       | 1.086***   |       | 1.086***   |       | 1.085***   |       |
| 95CI              | 1.078      | 1.095 | 1.078      | 1.095 | 1.077      | 1.094 | 1.077      | 1.094 |
| dCD_Parkinson     | 1.155***   |       | 1.154***   |       | 1.154***   |       | 1.143***   |       |
| 95CI              | 1.142      | 1.168 | 1.142      | 1.168 | 1.141      | 1.168 | 1.130      | 1.156 |
| dCD_Schizophrenia | 1.475***   |       | 1.474***   |       | 1.476***   |       | 1.474***   |       |
| 95CI              | 1.459      | 1.492 | 1.459      | 1.492 | 1.460      | 1.493 | 1.458      | 1.491 |
| dCD_COPD          | 0.971***   |       | 0.970***   |       | 0.970***   |       | 0.971***   |       |
| 95CI              | 0.965      | 0.977 | 0.965      | 0.977 | 0.964      | 0.977 | 0.965      | 0.978 |
| dCCI_ModLiver     | 1.003      |       | 1.002      |       | 1.003      |       | 1.003      |       |
| 95CI              | 0.990      | 1.016 | 0.990      | 1.016 | 0.990      | 1.016 | 0.991      | 1.017 |
| dCCI_PUD          | 0.969***   |       | 0.969***   |       | 0.969***   |       | 0.969***   |       |
| 95CI              | 0.964      | 0.975 | 0.964      | 0.975 | 0.964      | 0.975 | 0.963      | 0.975 |
| dCCI_PVD          | 1.226***   |       | 1.244***   |       | 1.234***   |       | 1.248***   |       |
| 95CI              | 1.217      | 1.235 | 1.217      | 1.235 | 1.225      | 1.243 | 1.238      | 1.257 |
| dCCI_SevereLiver  | 1.015      |       | 1.014      |       | 1.016      |       | 1.014      |       |
| 95CI              | 0.999      | 1.032 | 0.999      | 1.032 | 0.999      | 1.033 | 0.998      | 1.031 |
| _cons             | 2.233***   |       | 2.232***   |       | 2.226***   |       | 2.234***   |       |
|                   | 2.215      | 2.252 | 2.215      | 2.252 | 2.208      | 2.245 | 2.216      | 2.253 |
| N                 | 1908832    |       | 1908832    |       | 1908832    |       | 1908832    |       |
|                   | 10790634.3 |       | 10794131.0 |       | 10790860.0 | 1.8   | 10791675.1 | 9.0   |
| BIC               | 10790933.4 |       | 10794430.1 |       | 10791159.1 |       | 10791974.2 |       |

## Appendix 5. The incidence rates by age band, at risk population and incident cases

|          | age band | at risk population | incidence rate per 100,000 | annual incident cases |
|----------|----------|--------------------|----------------------------|-----------------------|
| Venous   | <40      | 1,957,020          | 1.2                        | 23                    |
|          | 40-49    | 614,941            | 7                          | 43                    |
|          | 50-59    | 614,492            | 19.9                       | 122                   |
|          | 60-69    | 466,620            | 37.5                       | 175                   |
|          | 70-79    | 211,447            | 66.7                       | 141                   |
|          | ≥80      | 101,276            | 91.8                       | 93                    |
|          | total    | 3,965,796          |                            | 598                   |
| Arterial | <40      | 1,957,020          | 1.1                        | 22                    |
|          | 40-49    | 614,941            | 15.6                       | 96                    |
|          | 50-59    | 614,492            | 67.5                       | 415                   |
|          | 60-69    | 466,620            | 143.4                      | 669                   |
|          | 70-79    | 211,447            | 246.4                      | 521                   |
|          | ≥80      | 101,276            | 477.9                      | 484                   |
|          | total    | 3,965,796          |                            | 2,206                 |
| Diabetic | <40      | 1,957,020          | 5.8                        | 114                   |
|          | 40-49    | 614,941            | 56.6                       | 348                   |
|          | 50-59    | 614,492            | 175.8                      | 1,080                 |
|          | 60-69    | 466,620            | 368.6                      | 1,720                 |
|          | 70-79    | 211,447            | 758.6                      | 1,604                 |
|          | ≥80      | 101,276            | 1791.1                     | 1,814                 |
|          | total    | 3,965,796          |                            | 6,680                 |
| Pressure | <40      | 1,957,020          | 4.8                        | 94                    |
|          | 40-49    | 614,941            | 22                         | 135                   |
|          | 50-59    | 614,492            | 74.4                       | 457                   |
|          | 60-69    | 466,620            | 236.4                      | 1,103                 |
|          | 70-79    | 211,447            | 844.2                      | 1,785                 |
|          | ≥80      | 101,276            | 3646.5                     | 3,693                 |
|          | total    | 3,965,796          |                            | 7,268                 |

**Appendix 6. EQ-5D scores by type of wound and time from Singapore Wound Registry**

| Mean (Std. Dev.) | Baseline            | month 1             | month 3             | month 6             |
|------------------|---------------------|---------------------|---------------------|---------------------|
| Venous           | 0.57 (0.34) (n=255) | 0.68 (0.31) (n=235) | 0.74 (0.30) (n=242) | 0.74 (0.30) (n=243) |
| Arterial         | 0.44 (0.40) (n=354) | 0.52 (0.42) (n=311) | 0.54 (0.45) (n=303) | 0.58 (0.44) (n=291) |
| Diabetic         | 0.64 (0.42) (n=139) | 0.71 (0.44) (n=128) | 0.72 (0.38) (n=129) | 0.74 (0.43) (n=126) |
| Pressure         | -0.18 (0.50) (n=51) | 0.00 (0.56) (n=43)  | 0.18 (0.54) (n=38)  | 0.11 (0.59) (n=40)  |

For peer review only



**Appendix 7 - SAS code for calculating the local EQ-5D index score from EQ-5D-3L**

```
1
2 *** coding of EQ-5D data: 1 = no problems, 2 = some/moderate problems, 3 = extreme problems;
3 *** mo = mobility, sc = self-care, ua = usual activity, pd = pain/discomfort, ad = anxiety/depression;
4
5 data new; set new;
6   if mo=2 then m2=1; else m2=0;
7   if mo=3 then m3=1; else m3=0;
8   if sc=2 then s2=1; else s2=0;
9   if sc=3 then s3=1; else s3=0;
10  if ua=2 then u2=1; else u2=0;
11  if ua=3 then u3=1; else u3=0;
12  if pd=2 then p2=1; else p2=0;
13  if pd=3 then p3=1; else p3=0;
14  if ad=2 then a2=1; else a2=0;
15  if ad=3 then a3=1; else a3=0;
16  if mo=3 or sc=3 or ua=3 or pd=3 or ad=3 then n3=1; else n3=0;
17  EQ_index = 1 - 0.1678*m2 - 0.3040*m3 - 0.1615*s2 - 0.3465*s3 - 0.2555*u2 - 0.3209*u3 - 0.1462*p2 - 0.2291*p3 - 0.1501*a2 - 0.2784*a3 - 0.2905*n3;
18  if mo=. or sc=. or ua=. or pd=. or ad=. then EQ_index =. ;
19  drop m2 m3 s2 s3 u2 u3 p2 p3 a2 a3 n3; run;
20
21
22
23
24
25
26
27
28
29
30
31
32
33
34
35
36
37
38
39
40
41
42
43
44
45
46
```

**Appendix 8. Mean duration of wounds in days, by age band; Mean (Standard Deviation)**

| Age Band | Venous (n=150) | Diabetic (n=245) | Pressure (n=24) |
|----------|----------------|------------------|-----------------|
| <40      | 133 (92)       | 177 (88)         | 55 (11)         |
| 40-49    | 129 (109)      | 325 (550)        | 86 (24)         |
| 50-59    | 331 (394)      | 224 (216)        | 115 (1)         |
| 60-69    | 223 (269)      | 314 (430)        | 103 (59)        |
| 70-79    | 307 (438)      | 256 (305)        | 105 (115)       |
| ≥80      | 205 (153)      | 160 (138)        | 62 (52)         |

# values for Diabetic were used to proxy 'Arterial' wounds

## Appendix 9 – usage and costs of outpatient services for patients with chronic wounds

|                                                       | with consult        |                       | without consult       |                        |
|-------------------------------------------------------|---------------------|-----------------------|-----------------------|------------------------|
|                                                       | mean (sd)           | 95% CI                | mean (sd)             | 95% CI                 |
| Total annual costs                                    |                     |                       |                       |                        |
| Costs of Outpatient with Consult - Arterial           | \$908.13 (\$778.27) | (\$815.39, \$1000.86) | \$992.01 (\$1241.53)  | (\$844.08, \$1139.94)  |
| Costs of Outpatient with Consult - Venous             | \$685.73 (\$575.30) | (\$603.62, \$767.84)  | \$2381.98 (\$2449.41) | (\$2024.72, \$2739.24) |
| Costs of Outpatient with Consult - Diabetic           | \$918.06 (\$823.40) | (\$752.11, \$1084.01) | \$1068.85 (\$905.06)  | (\$888.33, \$1249.36)  |
| Costs of Outpatient with Consult - Pressure           | \$702.40 (\$525.63) | (\$368.43, \$1036.37) | \$1111.98 (\$1330.34) | (-\$118.38, \$2342.34) |
| Annual visits                                         | mean (sd)           | 95% CI                | mean (sd)             | 95% CI                 |
| No. of Visits of Outpatient with Consult - Arterial   | 8.249 (6.107)       | (7.521, 8.977)        | 8.454 (6.362)         | (7.696, 9.212)         |
| No. of Visits of Outpatient with Consult - Venous     | 5.874 (5.932)       | (5.028, 6.721)        | 23.639 (18.989)       | (20.870, 26.409)       |
| No. of Visits of Outpatient with Consult - Diabetic   | 8.102 (6.209)       | (6.857, 9.347)        | 14.172 (51.225)       | (4.008, 24.336)        |
| No. of Visits of Outpatient with Consult - Pressure   | 6.5 (4.681)         | (3.526, 9.474)        | 9.714 (10.797)        | (-0.271, 19.700)       |
| Cost per Visit                                        | mean (sd)           | 95% CI                | mean (sd)             | 95% CI                 |
| Costs per Visit of Outpatient with Consult - Arterial | \$110.44 (\$46.69)  | (\$104.88, \$116.01)  | \$117.28 (\$87.66)    | (\$106.84, \$127.73)   |
| Costs per Visit of Outpatient with Consult - Venous   | \$133.24 (\$81.05)  | (\$121.67, \$144.80)  | \$106.81 (\$105.11)   | (\$91.48, \$122.14)    |
| Costs per Visit of Outpatient with Consult - Diabetic | \$112.00 (\$66.26)  | (\$98.64, \$125.35)   | \$114.93 (\$39.31)    | (\$107.08, \$122.77)   |
| Costs per Visit of Outpatient with Consult - Pressure | \$111.04 (\$55.19)  | (\$75.97, \$146.10)   | \$124.14 (\$38.92)    | (\$88.14, \$160.13)    |

**Appendix 10. Cohort of all patients who accessed CHAS, Polyclinic or Emergency departments (ED) 2012 to 2019**

|                                                             | CHAS      |           | Polyclinic |           | ED        |           |
|-------------------------------------------------------------|-----------|-----------|------------|-----------|-----------|-----------|
|                                                             | No Wound  | Any Wound | No Wound   | Any Wound | No Wound  | Any Wound |
| Number                                                      | 1,013,104 | 3,463     | 2,600,153  | 1,441     | 2,964,540 | 7,403     |
| Age                                                         | 49.4      | 67.9      | 37         | 65        | 36        | 68        |
| Male                                                        | 46%       | 45%       | 51%        | 57%       | 56%       | 52%       |
| CCI score                                                   | 2.6       | 4.0       | 2.1        | 4.3       | 2.0       | 5.0       |
| Chinese                                                     | 72%       | 78%       | 64%        | 61%       | 52%       | 61%       |
| Malay                                                       | 14%       | 10%       | 12%        | 13%       | 10%       | 17%       |
| Indian                                                      | 6%        | 8%        | 10%        | 20%       | 9%        | 13%       |
| Others                                                      | 9%        | 5%        | 14%        | 6%        | 30%       | 9%        |
| COPD                                                        | 3%        | 4%        | 2%         | 5%        | 3%        | 5%        |
| Diabetes Mellitus                                           | 32%       | 55%       | 28%        | 68%       | 30%       | 70%       |
| Hypertension                                                | 64%       | 82%       | 55%        | 81%       | 56%       | 83%       |
| Dyslipidemia                                                | 61%       | 72%       | 50%        | 78%       | 51%       | 77%       |
| Heart Failure                                               | 4%        | 13%       | 3%         | 15%       | 4%        | 22%       |
| Renal Failure                                               | 10%       | 24%       | 7%         | 26%       | 8%        | 39%       |
| Stroke                                                      | 8%        | 16%       | 7%         | 17%       | 8%        | 26%       |
| Dementia                                                    | 2%        | 6%        | 1%         | 6%        | 2%        | 16%       |
| Major Depression                                            | 3%        | 3%        | 2%         | 4%        | 2%        | 7%        |
| Parkinson                                                   | 1%        | 3%        | 1%         | 2%        | 1%        | 6%        |
| Schizophrenia                                               | 2%        | 2%        | 2%         | 3%        | 2%        | 3%        |
| Average no. of episodes in 12 months from wound/first visit | 3.1       | 6.2       | 1.8        | 2.8       | 1.4       | 2.6       |

**Appendix 11. Results of generalised linear model (GLM) with a Poisson link function to estimate excess use of poly-clinic services, CHAS and ED.**

|                                       |             |             |                       |
|---------------------------------------|-------------|-------------|-----------------------|
| <i>Polyclinic</i>                     | All         | No wound    | Any wound             |
| Number                                | 2601594     | 2600153     | 1441                  |
| Mean no. of episodes in 12 months, SD | 1.85(1.78)  | 1.85(1.77)  | 1.85(1.78)            |
| Median 12 month utilisation, IQR      | 1 (1-2)     | 1 (1-2)     | 2 (1-3)               |
| Coefficient                           |             |             | 0.352 (0.288,0.416)   |
| Rate ratio of Episodes, CI            |             |             | 1.423 (1.333,1.513 )  |
| Estimated mean Episodes, CI           |             |             | 2.157 (2.13,2.184 )   |
| Expected Episodes, CI                 |             |             | 3.069 (3.031 ,3.108 ) |
| Excess Episodes, CI                   |             |             | 0.912 (0.901 ,0.924 ) |
| <i>CHAS</i>                           | All         | No wound    | Any wound             |
| Number                                | 1016567     | 1013104     | 3463                  |
| Mean no. of episodes in 12 months, SD | 3.13 (3.75) | 3.12 (3.73) | 6.18 (7.30)           |
| Median 12 month utilisation, IQR      | 2 (1 - 4)   | 2 (1 - 4)   | 4(2 -8)               |
| Coefficient                           |             |             | 0.685 (0.669 , 0.701) |
| Rate ratio of Episodes, CI            |             |             | 1.984 (1.952 , 2.016) |
| Estimated mean Episodes, CI           |             |             | 3.596 (3.578 , 3.614) |
| Expected Episodes, CI                 |             |             | 7.134 (7.099 , 7.169) |
| Excess Episodes, CI                   |             |             | 3.538 (3.521 , 3.556) |
| <i>ED</i>                             | All         | No wound    | Any wound             |
| Number                                | 2971943     | 2964540     | 7403                  |
| Mean no. of episodes in 12 months, SD | 1.38(1.17)  | 1.38(1.16)  | 1.38(1.17)            |
| Median 12 month utilisation, IQR      | 1 (1-1)     | 1 (1-1)     | 2 (1-3)               |
| Coefficient                           |             |             | 0.343 (0.319 ,0.367 ) |
| Rate ratio of Episodes, CI            |             |             | 1.410 (1.376 ,1.444 ) |
| Estimated mean Episodes, CI           |             |             | 1.531 (1.515 ,1.547 ) |
| Expected Episodes, CI                 |             |             | 2.159 (2.136 ,2.181 ) |
| Excess Episodes, CI                   |             |             | 0.628 (0.621 ,0.634 ) |

## CHEERS 2022 Checklist

| <b>Title</b>                         |          |                                                                                                                                 |                |
|--------------------------------------|----------|---------------------------------------------------------------------------------------------------------------------------------|----------------|
| Title                                | 1        | Identify the study as an economic evaluation and specify the interventions being compared.                                      | N/A            |
| <b>Abstract</b>                      |          |                                                                                                                                 |                |
| Abstract                             | 2        | Provide a structured summary that highlights context, key methods, results, and alternative analyses.                           | P2             |
| <b>Introduction</b>                  |          |                                                                                                                                 |                |
| Background and objectives            | 3        | Give the context for the study, the study question, and its practical relevance for decision making in policy or practice.      | P3             |
| Methods                              |          |                                                                                                                                 |                |
| <b>Health economic analysis plan</b> | <b>4</b> | <b>Indicate whether a health economic analysis plan was developed and where available.</b>                                      | <b>P4 TO 9</b> |
| Study population                     | 5        | Describe characteristics of the study population (such as age range, demographics, socioeconomic, or clinical characteristics). | P4             |
| Setting and location                 | 6        | Provide relevant contextual information that may influence findings.                                                            | P3 TO 4        |
| Comparators                          | 7        | Describe the interventions or strategies being compared and why chosen.                                                         | N/A            |
| Perspective                          | 8        | State the perspective(s) adopted by the study and why chosen.                                                                   | P4             |
| Time horizon                         | 9        | State the time horizon for the study and why appropriate.                                                                       | P4             |

(continued)

|                                                  |    |                                                                                                                                                 |          |
|--------------------------------------------------|----|-------------------------------------------------------------------------------------------------------------------------------------------------|----------|
| Discount rate                                    | 10 | Report the discount rate(s) and reason chosen.                                                                                                  | N/A      |
| Selection of outcomes                            | 11 | Describe what outcomes were used as the measure(s) of benefit(s) and harm(s).                                                                   | FIGURE 1 |
| Measurement of outcomes                          | 12 | Describe how outcomes used to capture benefit(s) and harm(s) were measured.                                                                     | P4 TO 9  |
| Valuation of outcomes                            | 13 | Describe the population and methods used to measure and value outcomes.                                                                         | P4 TO 9  |
| Measurement and valuation of resources and costs | 14 | Describe how costs were valued.                                                                                                                 | P4 TO 9  |
| Currency, price date, and conversion             | 15 | Report the dates of the estimated resource quantities and unit costs, plus the currency and year of conversion.                                 | P4       |
| Rationale and description of model               | 16 | If modelling is used, describe in detail and why used. Report if the model is publicly available and where it can be accessed.                  | P9       |
| Analytics and assumptions                        | 17 | Describe any methods for analysing or statistically transforming data, any extrapolation methods, and approaches for validating any model used. | P4 TO 9  |
| Characterising heterogeneity                     | 18 | Describe any methods used for estimating how the results of the study vary for subgroups.                                                       | P4 TO 9  |
| Characterising distributional effects            | 19 | Describe how impacts are distributed across different individuals or adjustments made to reflect priority populations.                          | P4 TO 9  |

1  
2  
3  
4  
5  
6  
7  
8  
9  
10  
11  
12  
13  
14  
15  
16  
17  
18  
19  
20  
21  
22  
23  
24  
25  
26  
27  
28  
29  
30  
31  
32  
33  
34  
35  
36  
37  
38  
39  
40  
41  
42  
43  
44  
45  
46  
47  
48  
49  
50  
51  
52  
53  
54  
55  
56  
57  
58  
59  
60*(continued)*

|                                                                       |    |                                                                                                                                                                               |           |
|-----------------------------------------------------------------------|----|-------------------------------------------------------------------------------------------------------------------------------------------------------------------------------|-----------|
| Characterising uncertainty                                            | 20 | Describe methods to characterise any sources of uncertainty in the analysis.                                                                                                  | P9        |
| Approach to engagement with patients and others affected by the study | 21 | Describe any approaches to engage patients or service recipients, the general public, communities, or stakeholders (such as clinicians or payers) in the design of the study. | P9        |
| <b>Results</b>                                                        |    |                                                                                                                                                                               |           |
| Study parameters                                                      | 22 | Report all analytic inputs (such as values, ranges, references) including uncertainty or distributional assumptions.                                                          | P4 TO 9   |
| Summary of main results                                               | 23 | Report the mean values for the main categories of costs and outcomes of interest and summarise them in the most appropriate overall measure.                                  | P10 TO 11 |
| Effect of uncertainty                                                 | 24 | Describe how uncertainty about analytic judgments, inputs, or projections affect findings. Report the effect of choice of discount rate and time horizon, if applicable.      | N/A       |
| Effect of engagement with patients and others affected by the study   | 25 | Report on any difference patient/service recipient, general public, community, or stakeholder involvement made to the approach or findings of the study                       | N/A       |

Discussion



(continued)

|                                                                             |           |                                                                                                                                                   |                  |
|-----------------------------------------------------------------------------|-----------|---------------------------------------------------------------------------------------------------------------------------------------------------|------------------|
| <p>Study findings, limitations, generalisability, and current knowledge</p> | <p>26</p> | <p>Report key findings, limitations, ethical or equity considerations not captured, and how these could affect patients, policy, or practice.</p> | <p>P11 TP 13</p> |
| <p>Other relevant information</p> <p>Source of funding</p>                  | <p>27</p> | <p>Describe how the study was funded and any role of the funder in the identification, design, conduct, and reporting of the analysis</p>         | <p>P13</p>       |
| <p>Conflicts of interest</p>                                                | <p>28</p> | <p>Report authors conflicts of interest according to journal or International Committee of Medical Journal Editors requirements.</p>              | <p>P13</p>       |

From: Husereau D, Drummond M, Augustovski F, et al. Consolidated Health Economic Evaluation Reporting Standards 2022 (CHEERS 2022) Explanation and Elaboration: A Report of the ISPOR CHEERS II Good Practices Task Force. *Value Health* 2022;25. doi:10.1016/j.jval.2021.10.008
