# Supplementary material for: Chronic wounds in a multiethnic Asian population: a cost of illness study
Source: PubMed Central journal article supplement — BMJ Open. 2023 Sep 18;13(9):e065692. doi: 10.1136/bmjopen-2022-065692 (PMC10510887; doi:10.1136/bmjopen-2022-065692), 2023-09-18
Supplement: bmjopen-2022-065692supp001.pdf [file bmjopen-2022-065692supp001.pdf]

**Appendix 1. ICD-9 codes used to identify chronic wounds from national claims dataset**

Venous ulcers – *ICD-9-AM: 4540, 4532, 4591; ICD-10-AM: I83.0, I83.2, I87.0.*

Arterial insufficiency ulcers – *ICD-9-AM: 44023, 44024; ICD-10-AM: I70.23, I70.24*

Diabetic ulcers – *ICD-9-AM: 7071, 7078, 7079, 7854 & one of 25070, 25071, 25072 or 25073; ICD-10-AM: E10.73, E11.73, E13.73, E14.73, E10.52, E11.52, E13.52, E14.52, E09.02, E09.52, E10.69, E11.69, E13.69, E14.69*

Pressure ulcers – *ICD-9-AM: 7070; ICD-10-AM: L89.0, L89.1, L89.2, L89.3, L89.4, L89.5, L89.6, L89.7, L89.8, L89.9*

**Appendix 2. Cohort of all hospital admissions for a relevant chronic wound 2012 to 2019**

|                               | All         | No wound    | Arterial    | Venous      | Diabetic    | Pressure    |
|-------------------------------|-------------|-------------|-------------|-------------|-------------|-------------|
| Number                        | 5,196,899   | 5,047,162   | 14,536      | 19,210      | 16,999      | 49,879      |
| Age, mean (st dev)            | 50.4 (26.9) | 49.6 (26.8) | 75 (13.3)   | 72.1 (17.1) | 72.4 (15.7) | 81.7 (13)   |
| Male                          | 49%         | 48%         | 56%         | 57%         | 58%         | 50%         |
| CCI score (mean)              | 4.1         | 4.1         | 6.1         | 4.7         | 5.9         | 4.4         |
| Chinese                       | 64%         | 64%         | 63%         | 60%         | 54%         | 71%         |
| Malay                         | 14%         | 14%         | 17%         | 16%         | 21%         | 13%         |
| Indian                        | 10%         | 10%         | 11%         | 13%         | 13%         | 6%          |
| Others                        | 12%         | 12%         | 9%          | 11%         | 12%         | 10%         |
| COPD                          | 7%          | 7%          | 6%          | 5%          | 5%          | 8%          |
| Diabetes Mellitus             | 42%         | 42%         | 82%         | 57%         | 100%        | 40%         |
| Hypertension                  | 69%         | 68%         | 92%         | 77%         | 88%         | 76%         |
| Dyslipidemia                  | 61%         | 61%         | 84%         | 67%         | 86%         | 59%         |
| Heart Failure                 | 14%         | 14%         | 33%         | 21%         | 27%         | 14%         |
| Renal Failure                 | 24%         | 23%         | 49%         | 30%         | 44%         | 21%         |
| Stroke                        | 17%         | 17%         | 27%         | 19%         | 20%         | 40%         |
| Dementia                      | 6%          | 6%          | 7%          | 5%          | 4%          | 33%         |
| Major Depression              | 6%          | 6%          | 5%          | 5%          | 6%          | 8%          |
| Parkinson                     | 3%          | 3%          | 2%          | 2%          | 1%          | 17%         |
| Schizophrenia                 | 4%          | 4%          | 1%          | 3%          | 2%          | 4%          |
| Length of Stay, mean (st dev) | 6.5(17)     | 6.3 (16.7)  | 16.2 (20.2) | 9.8 (16)    | 14 (18.6)   | 16.8 (25.2) |

**Appendix 3. Summary results of generalised linear model (GLM) with a gamma link function to estimate excess length of stay**

|                                        | All       | No wound   | Arterial            | Venous              | Diabetic            | Pressure            |
|----------------------------------------|-----------|------------|---------------------|---------------------|---------------------|---------------------|
| Number                                 | 5,196,899 | 5,054,937  | 14,536              | 19,210              | 16,999              | 49,879              |
| Length of Stay, mean (st dev)          | 6.5 (17)  | 6.3 (16.7) | 16.2 (20.2)         | 9.8 (16)            | 14 (18.6)           | 16.8 (25.2)         |
| Coefficient (95% CI)                   | -         | -          | 0.722 (0.690,0.754) | 0.303 (0.272,0.333) | 0.701 (0.669,0.733) | 0.543 (0.516,0.570) |
| Rate ratio of length of stay (95% CI)  | -         | -          | 2.059 (1.993,2.126) | 1.353 (1.993,2.126) | 2.015 (1.952,2.081) | 1.722 (1.676,1.769) |
| Estimated mean length of stay (95% CI) | -         | -          | 2.233 (2.215,2.252) | 2.232 (2.215,2.252) | 2.226 (2.208,2.245) | 2.234 (2.216,2.253) |
| Expected length of stay (95% CI)       | -         | -          | 4.598 (4.414,4.788) | 3.02 (4.414,4.788)  | 4.485 (4.31,4.672)  | 3.847 (3.714,3.986) |
| Excess length of stay (95% CI)         | -         | -          | 2.365 (2.199,2.536) | 0.788 (2.199,2.536) | 2.259 (2.102,2.427) | 1.613 (1.498,1.733) |

**Appendix 4. Full results of generalised linear model (GLM) with a gamma link function to estimate excess length of stay**

| Co-variate    | Exponentiated coefficients; 95% confidence intervals in brackets |       |          |       |          |       |          |       |
|---------------|------------------------------------------------------------------|-------|----------|-------|----------|-------|----------|-------|
| los_cens      | Arterial                                                         |       | Venous   |       | Diabetic |       | Pressure |       |
| d_ulcer       | 2.059***                                                         |       | 1.353*** |       | 2.015*** |       | 1.722*** |       |
| 95CI          | 1.993                                                            | 2.126 | 1.993    | 2.126 | 1.952    | 2.081 | 1.676    | 1.769 |
| age           | 1.013***                                                         |       | 1.013*** |       | 1.013*** |       | 1.013*** |       |
| 95CI          | 1.013                                                            | 1.013 | 1.013    | 1.013 | 1.013    | 1.013 | 1.013    | 1.013 |
| male          | 1.019***                                                         |       | 1.020*** |       | 1.019*** |       | 1.020*** |       |
| 95CI          | 1.016                                                            | 1.023 | 1.016    | 1.023 | 1.015    | 1.023 | 1.016    | 1.024 |
| 1.Race        | 1                                                                |       | 1        |       | 1        |       | 1        |       |
| 2.Race        | 0.989***                                                         |       | 0.989*** |       | 0.987*** |       | 0.988*** |       |
| 95CI          | 0.983                                                            | 0.994 | 0.983    | 0.994 | 0.982    | 0.992 | 0.983    | 0.993 |
| 3.Race        | 0.903***                                                         |       | 0.902*** |       | 0.902*** |       | 0.904*** |       |
| 95CI          | 0.898                                                            | 0.909 | 0.898    | 0.909 | 0.897    | 0.908 | 0.898    | 0.910 |
| 4.Race        | 0.935***                                                         |       | 0.935*** |       | 0.934*** |       | 0.935*** |       |
| 95CI          | 0.927                                                            | 0.942 | 0.927    | 0.942 | 0.926    | 0.941 | 0.928    | 0.943 |
| dCCI_AMI      | 0.941***                                                         |       | 0.943*** |       | 0.942*** |       | 0.943*** |       |
| 95CI          | 0.936                                                            | 0.946 | 0.936    | 0.946 | 0.937    | 0.948 | 0.938    | 0.948 |
| dCCI_Cancer   | 1.099***                                                         |       | 1.099*** |       | 1.099*** |       | 1.099*** |       |
| 95CI          | 1.094                                                            | 1.105 | 1.094    | 1.105 | 1.093    | 1.105 | 1.094    | 1.105 |
| dCD_DM        | 1.094***                                                         |       | 1.096*** |       | 1.091*** |       | 1.098*** |       |
| 95CI          | 1.090                                                            | 1.099 | 1.090    | 1.099 | 1.087    | 1.096 | 1.093    | 1.102 |
| dCD_Hyp       | 1.076***                                                         |       | 1.077*** |       | 1.077*** |       | 1.078*** |       |
| 95CI          | 1.071                                                            | 1.082 | 1.071    | 1.082 | 1.071    | 1.083 | 1.072    | 1.084 |
| dCD_LPD       | 0.919***                                                         |       | 0.919*** |       | 0.918*** |       | 0.920*** |       |
| 95CI          | 0.914                                                            | 0.923 | 0.914    | 0.923 | 0.914    | 0.923 | 0.916    | 0.925 |
| dCD_HeartFail | 1.040***                                                         |       | 1.040*** |       | 1.041*** |       | 1.041*** |       |
| 95CI          | 1.034                                                            | 1.046 | 1.034    | 1.046 | 1.035    | 1.046 | 1.036    | 1.047 |
| dCCI_Renal    | 1.113***                                                         |       | 1.115*** |       | 1.113*** |       | 1.115*** |       |
| 95CI          | 1.108                                                            | 1.118 | 1.108    | 1.118 | 1.108    | 1.118 | 1.110    | 1.121 |
| dCD_Stroke    | 1.153***                                                         |       | 1.153*** |       | 1.154*** |       | 1.150*** |       |
| 95CI          | 1.148                                                            | 1.159 | 1.148    | 1.159 | 1.149    | 1.159 | 1.144    | 1.155 |
| dCD_Dementia  | 1.144***                                                         |       | 1.143*** |       | 1.143*** |       | 1.132*** |       |

|                   |            |       |            |       |            |       |            |       |
|-------------------|------------|-------|------------|-------|------------|-------|------------|-------|
| 95CI              | 1.135      | 1.152 | 1.135      | 1.152 | 1.134      | 1.151 | 1.124      | 1.141 |
| dCD_MajDepression | 1.086***   |       | 1.086***   |       | 1.086***   |       | 1.085***   |       |
| 95CI              | 1.078      | 1.095 | 1.078      | 1.095 | 1.077      | 1.094 | 1.077      | 1.094 |
| dCD_Parkinson     | 1.155***   |       | 1.154***   |       | 1.154***   |       | 1.143***   |       |
| 95CI              | 1.142      | 1.168 | 1.142      | 1.168 | 1.141      | 1.168 | 1.130      | 1.156 |
| dCD_Schizophrenia | 1.475***   |       | 1.474***   |       | 1.476***   |       | 1.474***   |       |
| 95CI              | 1.459      | 1.492 | 1.459      | 1.492 | 1.460      | 1.493 | 1.458      | 1.491 |
| dCD_COPD          | 0.971***   |       | 0.970***   |       | 0.970***   |       | 0.971***   |       |
| 95CI              | 0.965      | 0.977 | 0.965      | 0.977 | 0.964      | 0.977 | 0.965      | 0.978 |
| dCCI_ModLiver     | 1.003      |       | 1.002      |       | 1.003      |       | 1.003      |       |
| 95CI              | 0.990      | 1.016 | 0.990      | 1.016 | 0.990      | 1.016 | 0.991      | 1.017 |
| dCCI_PUD          | 0.969***   |       | 0.969***   |       | 0.969***   |       | 0.969***   |       |
| 95CI              | 0.964      | 0.975 | 0.964      | 0.975 | 0.964      | 0.975 | 0.963      | 0.975 |
| dCCI_PVD          | 1.226***   |       | 1.244***   |       | 1.234***   |       | 1.248***   |       |
| 95CI              | 1.217      | 1.235 | 1.217      | 1.235 | 1.225      | 1.243 | 1.238      | 1.257 |
| dCCI_SevereLiver  | 1.015      |       | 1.014      |       | 1.016      |       | 1.014      |       |
| 95CI              | 0.999      | 1.032 | 0.999      | 1.032 | 0.999      | 1.033 | 0.998      | 1.031 |
| _cons             | 2.233***   |       | 2.232***   |       | 2.226***   |       | 2.234***   |       |
|                   | 2.215      | 2.252 | 2.215      | 2.252 | 2.208      | 2.245 | 2.216      | 2.253 |
| N                 | 1908832    |       | 1908832    |       | 1908832    |       | 1908832    |       |
|                   | 10790634.3 |       | 10794131.0 |       | 10790860.0 | 1.8   | 10791675.1 | 9.0   |
| BIC               | 10790933.4 |       | 10794430.1 |       | 10791159.1 |       | 10791974.2 |       |

**Appendix 5. The incidence rates by age band, at risk population and incident cases**

|          | age band | at risk population | incidence rate per 100,000 | annual incident cases |
|----------|----------|--------------------|----------------------------|-----------------------|
| Venous   | <40      | 1,957,020          | 1.2                        | 23                    |
|          | 40-49    | 614,941            | 7                          | 43                    |
|          | 50-59    | 614,492            | 19.9                       | 122                   |
|          | 60-69    | 466,620            | 37.5                       | 175                   |
|          | 70-79    | 211,447            | 66.7                       | 141                   |
|          | ≥80      | 101,276            | 91.8                       | 93                    |
|          | total    | 3,965,796          |                            | 598                   |
| Arterial | <40      | 1,957,020          | 1.1                        | 22                    |
|          | 40-49    | 614,941            | 15.6                       | 96                    |
|          | 50-59    | 614,492            | 67.5                       | 415                   |
|          | 60-69    | 466,620            | 143.4                      | 669                   |
|          | 70-79    | 211,447            | 246.4                      | 521                   |
|          | ≥80      | 101,276            | 477.9                      | 484                   |
|          | total    | 3,965,796          |                            | 2,206                 |
| Diabetic | <40      | 1,957,020          | 5.8                        | 114                   |
|          | 40-49    | 614,941            | 56.6                       | 348                   |
|          | 50-59    | 614,492            | 175.8                      | 1,080                 |
|          | 60-69    | 466,620            | 368.6                      | 1,720                 |
|          | 70-79    | 211,447            | 758.6                      | 1,604                 |
|          | ≥80      | 101,276            | 1791.1                     | 1,814                 |
|          | total    | 3,965,796          |                            | 6,680                 |
| Pressure | <40      | 1,957,020          | 4.8                        | 94                    |
|          | 40-49    | 614,941            | 22                         | 135                   |
|          | 50-59    | 614,492            | 74.4                       | 457                   |
|          | 60-69    | 466,620            | 236.4                      | 1,103                 |
|          | 70-79    | 211,447            | 844.2                      | 1,785                 |
|          | ≥80      | 101,276            | 3646.5                     | 3,693                 |
|          | total    | 3,965,796          |                            | 7,268                 |

**Appendix 6. EQ-5D scores by type of wound and time from Singapore Wound Registry**

| Mean (Std. Dev.) | Baseline            | month 1             | month 3             | month 6             |
|------------------|---------------------|---------------------|---------------------|---------------------|
| Venous           | 0.57 (0.34) (n=255) | 0.68 (0.31) (n=235) | 0.74 (0.30) (n=242) | 0.74 (0.30) (n=243) |
| Arterial         | 0.44 (0.40) (n=354) | 0.52 (0.42) (n=311) | 0.54 (0.45) (n=303) | 0.58 (0.44) (n=291) |
| Diabetic         | 0.64 (0.42) (n=139) | 0.71 (0.44) (n=128) | 0.72 (0.38) (n=129) | 0.74 (0.43) (n=126) |
| Pressure         | -0.18 (0.50) (n=51) | 0.00 (0.56) (n=43)  | 0.18 (0.54) (n=38)  | 0.11 (0.59) (n=40)  |

**Appendix 7 - SAS code for calculating the local EQ-5D index score from EQ-5D-3L**

```
*** coding of EQ-5D data: 1 = no problems, 2 = some/moderate problems, 3 = extreme problems;
*** mo = mobility, sc = self-care, ua = usual activity, pd = pain/discomfort, ad = anxiety/depression;

data new; set new;
  if mo=2 then m2=1; else m2=0;
  if mo=3 then m3=1; else m3=0;
  if sc=2 then s2=1; else s2=0;
  if sc=3 then s3=1; else s3=0;
  if ua=2 then u2=1; else u2=0;
  if ua=3 then u3=1; else u3=0;
  if pd=2 then p2=1; else p2=0;
  if pd=3 then p3=1; else p3=0;
  if ad=2 then a2=1; else a2=0;
  if ad=3 then a3=1; else a3=0;
  if mo=3 or sc=3 or ua=3 or pd=3 or ad=3 then n3=1; else n3=0;
  EQ_index = 1 - 0.1678*m2 - 0.3040*m3 - 0.1615*s2 - 0.3465*s3 - 0.2555*u2 - 0.3209*u3 - 0.1462*p2 - 0.2291*p3 - 0.1501*a2 - 0.2784*a3 - 0.2905*n3;
  if mo =. or sc =. or ua =. or pd =. or ad =. then EQ_index =. ;
drop m2 m3 s2 s3 u2 u3 p2 p3 a2 a3 n3; run;
```



**Appendix 8. Mean duration of wounds in days, by age band; Mean (Standard Deviation)**

| Age Band | Venous (n=150) | Diabetic (n=245) | Pressure (n=24) |
|----------|----------------|------------------|-----------------|
| <40      | 133 (92)       | 177 (88)         | 55 (11)         |
| 40-49    | 129 (109)      | 325 (550)        | 86 (24)         |
| 50-59    | 331 (394)      | 224 (216)        | 115 (1)         |
| 60-69    | 223 (269)      | 314 (430)        | 103 (59)        |
| 70-79    | 307 (438)      | 256 (305)        | 105 (115)       |
| ≥80      | 205 (153)      | 160 (138)        | 62 (52)         |

# values for Diabetic were used to proxy 'Arterial' wounds

**Appendix 9 – usage and costs of outpatient services for patients with chronic wounds**

|                                                       | with consult        |                       | without consult       |                        |
|-------------------------------------------------------|---------------------|-----------------------|-----------------------|------------------------|
|                                                       | mean (sd)           | 95% CI                | mean (sd)             | 95% CI                 |
| Total annual costs                                    |                     |                       |                       |                        |
| Costs of Outpatient with Consult - Arterial           | \$908.13 (\$778.27) | (\$815.39, \$1000.86) | \$992.01 (\$1241.53)  | (\$844.08, \$1139.94)  |
| Costs of Outpatient with Consult - Venous             | \$685.73 (\$575.30) | (\$603.62, \$767.84)  | \$2381.98 (\$2449.41) | (\$2024.72, \$2739.24) |
| Costs of Outpatient with Consult - Diabetic           | \$918.06 (\$823.40) | (\$752.11, \$1084.01) | \$1068.85 (\$905.06)  | (\$888.33, \$1249.36)  |
| Costs of Outpatient with Consult - Pressure           | \$702.40 (\$525.63) | (\$368.43, \$1036.37) | \$1111.98 (\$1330.34) | (-\$118.38, \$2342.34) |
| Annual visits                                         |                     |                       |                       |                        |
| No. of Visits of Outpatient with Consult - Arterial   | 8.249 (6.107)       | (7.521, 8.977)        | 8.454 (6.362)         | (7.696, 9.212)         |
| No. of Visits of Outpatient with Consult - Venous     | 5.874 (5.932)       | (5.028, 6.721)        | 23.639 (18.989)       | (20.870, 26.409)       |
| No. of Visits of Outpatient with Consult - Diabetic   | 8.102 (6.209)       | (6.857, 9.347)        | 14.172 (51.225)       | (4.008, 24.336)        |
| No. of Visits of Outpatient with Consult - Pressure   | 6.5 (4.681)         | (3.526, 9.474)        | 9.714 (10.797)        | (-0.271, 19.700)       |
| Cost per Visit                                        |                     |                       |                       |                        |
| Costs per Visit of Outpatient with Consult - Arterial | \$110.44 (\$46.69)  | (\$104.88, \$116.01)  | \$117.28 (\$87.66)    | (\$106.84, \$127.73)   |
| Costs per Visit of Outpatient with Consult - Venous   | \$133.24 (\$81.05)  | (\$121.67, \$144.80)  | \$106.81 (\$105.11)   | (\$91.48, \$122.14)    |
| Costs per Visit of Outpatient with Consult - Diabetic | \$112.00 (\$66.26)  | (\$98.64, \$125.35)   | \$114.93 (\$39.31)    | (\$107.08, \$122.77)   |
| Costs per Visit of Outpatient with Consult - Pressure | \$111.04 (\$55.19)  | (\$75.97, \$146.10)   | \$124.14 (\$38.92)    | (\$88.14, \$160.13)    |

**Appendix 10. Cohort of all patients who accessed CHAS, Polyclinic or Emergency departments (ED) 2012 to 2019**

|                                                             | CHAS      |           | Polyclinic |           | ED        |           |
|-------------------------------------------------------------|-----------|-----------|------------|-----------|-----------|-----------|
|                                                             | No Wound  | Any Wound | No Wound   | Any Wound | No Wound  | Any Wound |
| Number                                                      | 1,013,104 | 3,463     | 2,600,153  | 1,441     | 2,964,540 | 7,403     |
| Age                                                         | 49.4      | 67.9      | 37         | 65        | 36        | 68        |
| Male                                                        | 46%       | 45%       | 51%        | 57%       | 56%       | 52%       |
| CCI score                                                   | 2.6       | 4.0       | 2.1        | 4.3       | 2.0       | 5.0       |
| Chinese                                                     | 72%       | 78%       | 64%        | 61%       | 52%       | 61%       |
| Malay                                                       | 14%       | 10%       | 12%        | 13%       | 10%       | 17%       |
| Indian                                                      | 6%        | 8%        | 10%        | 20%       | 9%        | 13%       |
| Others                                                      | 9%        | 5%        | 14%        | 6%        | 30%       | 9%        |
| COPD                                                        | 3%        | 4%        | 2%         | 5%        | 3%        | 5%        |
| Diabetes Mellitus                                           | 32%       | 55%       | 28%        | 68%       | 30%       | 70%       |
| Hypertension                                                | 64%       | 82%       | 55%        | 81%       | 56%       | 83%       |
| Dyslipidemia                                                | 61%       | 72%       | 50%        | 78%       | 51%       | 77%       |
| Heart Failure                                               | 4%        | 13%       | 3%         | 15%       | 4%        | 22%       |
| Renal Failure                                               | 10%       | 24%       | 7%         | 26%       | 8%        | 39%       |
| Stroke                                                      | 8%        | 16%       | 7%         | 17%       | 8%        | 26%       |
| Dementia                                                    | 2%        | 6%        | 1%         | 6%        | 2%        | 16%       |
| Major Depression                                            | 3%        | 3%        | 2%         | 4%        | 2%        | 7%        |
| Parkinson                                                   | 1%        | 3%        | 1%         | 2%        | 1%        | 6%        |
| Schizophrenia                                               | 2%        | 2%        | 2%         | 3%        | 2%        | 3%        |
| Average no. of episodes in 12 months from wound/first visit | 3.1       | 6.2       | 1.8        | 2.8       | 1.4       | 2.6       |

**Appendix 11. Results of generalised linear model (GLM) with a Poisson link function to estimate excess use of poly-clinic services, CHAS and ED.**

| <i>Polyclinic</i>                     | All         | No wound    | Any wound             |
|---------------------------------------|-------------|-------------|-----------------------|
| Number                                | 2601594     | 2600153     | 1441                  |
| Mean no. of episodes in 12 months, SD | 1.85(1.78)  | 1.85(1.77)  | 1.85(1.78)            |
| Median 12 month utilisation, IQR      | 1 (1-2)     | 1 (1-2)     | 2 (1-3)               |
| Coefficient                           |             |             | 0.352 (0.288,0.416)   |
| Rate ratio of Episodes, CI            |             |             | 1.423 (1.333,1.513 )  |
| Estimated mean Episodes, CI           |             |             | 2.157 (2.13,2.184 )   |
| Expected Episodes, CI                 |             |             | 3.069 (3.031 ,3.108 ) |
| Excess Episodes, CI                   |             |             | 0.912 (0.901 ,0.924 ) |
| <i>CHAS</i>                           | All         | No wound    | Any wound             |
| Number                                | 1016567     | 1013104     | 3463                  |
| Mean no. of episodes in 12 months, SD | 3.13 (3.75) | 3.12 (3.73) | 6.18 (7.30)           |
| Median 12 month utilisation, IQR      | 2 (1 - 4)   | 2 (1 - 4)   | 4(2 -8)               |
| Coefficient                           |             |             | 0.685 (0.669 , 0.701) |
| Rate ratio of Episodes, CI            |             |             | 1.984 (1.952 , 2.016) |
| Estimated mean Episodes, CI           |             |             | 3.596 (3.578 , 3.614) |
| Expected Episodes, CI                 |             |             | 7.134 (7.099 , 7.169) |
| Excess Episodes, CI                   |             |             | 3.538 (3.521 , 3.556) |
| <i>ED</i>                             | All         | No wound    | Any wound             |
| Number                                | 2971943     | 2964540     | 7403                  |
| Mean no. of episodes in 12 months, SD | 1.38(1.17)  | 1.38(1.16)  | 1.38(1.17)            |
| Median 12 month utilisation, IQR      | 1 (1-1)     | 1 (1-1)     | 2 (1-3)               |
| Coefficient                           |             |             | 0.343 (0.319 ,0.367 ) |
| Rate ratio of Episodes, CI            |             |             | 1.410 (1.376 ,1.444 ) |
| Estimated mean Episodes, CI           |             |             | 1.531 (1.515 ,1.547 ) |
| Expected Episodes, CI                 |             |             | 2.159 (2.136 ,2.181 ) |
| Excess Episodes, CI                   |             |             | 0.628 (0.621 ,0.634 ) |
